# Supplementary material for: Comparative Genomic Analysis of Trichinella spiralis Reveals Potential Mechanisms of Adaptive Evolution
Source: Biomed Res Int. 2019 May 21;2019:2948973. doi: 10.1155/2019/2948973 (PMC6556364; doi:10.1155/2019/2948973)
Supplement: Supplementary Materials — 2. Nucleotide sequences with more than 30% identity were selected and a total of 1997 orthologs were obtained (See Supplementary Dataset 1). Orthologs genes of five nematodes (A. ceylanicum, B. malayi, C. elegans, T. spiralis, and T. suis) for positive selection were identified. The data has been deposited in the orthologs genes of five nematodes (A. ceylanicum, B. malayi, C. elegans, T. spiralis, and T. suis) for positive selection repository. See Supplementary Dataset 1. 3. By using CODEML program to infer a dN/dS ratio for each pair of sequences, 986 genes were selected (p-value<0.01) (Supplementary Dataset 2). The data has been deposited in the positive selection genes of T. spiralis by comparing with four related nematodes. See Supplementary Dataset 2. 4. PSGs were grouped into the GO categories of biological processes, cellular components, and molecular functions (Supplementary Dataset 3). The data has been deposited in the GO analysis of PSGs in Trichinella spiralis by comparing with other four related nematodes. See Supplementary Dataset 3. 5. Gene Ontology (GO) term analysis for the positively selected genes of T. spiralis with four related nematodes (Figure 1). The figure has been deposited in the Gene Ontology (GO) term analysis for the positively selected genes of T. spiralis. See Figure 1 (included in the manuscript). 6. Molecular interaction and reaction networks of identified PSGs products were analyzed through KEGG pathway maps, which revealed that some PSGs could be ascribed to specific pathways, including metabolic pathways, the mRNA surveillance pathway, pentose phosphate pathway, amino sugar and nucleotide sugar, synthesis pathways, endocytosis, nucleotide excision repair, calcium signaling pathway, purine metabolism, inositol phosphate metabolism, and the phosphatidylinositol signaling system (Figure 2; Supplementary Dataset 4). The data has been deposited in the Pathway Information of Kyoto Encyclopedia of Genes and Genomes (KEGG) of positively [file 2948973.f1.zip]

Archive with 5 entries (4 files):
- supplementary files/Supplementary dataset 1 Orthologues genes of five nematodes (A. ceylanicum, B. malayi, C. elegans, T. spiralis and T. suis) for positive selection.xls
- supplementary files/Supplementary dataset 2 Positive selection genes of T. spiralis by comparing with four related nematodes.docx
- supplementary files/Supplementary dateset 3 GO analysis of PSGs in Trichinella spiralis by comparing with other four related nematodes.xlsx
- supplementary files/Supplementary dateset 4 Pathway Information of Kyoto Encyclopedia of Genes and Genomes(KEGG) of positively selected genes of Trichinella spiralis.xlsx
- supplementary files/
