# Supplementary material for: Comparative Genomic Analysis of Trichinella spiralis Reveals Potential Mechanisms of Adaptive Evolution
Source: Biomed Res Int. 2019 May 21;2019:2948973. doi: 10.1155/2019/2948973 (PMC6556364; doi:10.1155/2019/2948973)
Supplement: Supplementary Materials — 2. Nucleotide sequences with more than 30% identity were selected and a total of 1997 orthologs were obtained (See Supplementary Dataset 1). Orthologs genes of five nematodes (A. ceylanicum, B. malayi, C. elegans, T. spiralis, and T. suis) for positive selection were identified. The data has been deposited in the orthologs genes of five nematodes (A. ceylanicum, B. malayi, C. elegans, T. spiralis, and T. suis) for positive selection repository. See Supplementary Dataset 1. 3. By using CODEML program to infer a dN/dS ratio for each pair of sequences, 986 genes were selected (p-value<0.01) (Supplementary Dataset 2). The data has been deposited in the positive selection genes of T. spiralis by comparing with four related nematodes. See Supplementary Dataset 2. 4. PSGs were grouped into the GO categories of biological processes, cellular components, and molecular functions (Supplementary Dataset 3). The data has been deposited in the GO analysis of PSGs in Trichinella spiralis by comparing with other four related nematodes. See Supplementary Dataset 3. 5. Gene Ontology (GO) term analysis for the positively selected genes of T. spiralis with four related nematodes (Figure 1). The figure has been deposited in the Gene Ontology (GO) term analysis for the positively selected genes of T. spiralis. See Figure 1 (included in the manuscript). 6. Molecular interaction and reaction networks of identified PSGs products were analyzed through KEGG pathway maps, which revealed that some PSGs could be ascribed to specific pathways, including metabolic pathways, the mRNA surveillance pathway, pentose phosphate pathway, amino sugar and nucleotide sugar, synthesis pathways, endocytosis, nucleotide excision repair, calcium signaling pathway, purine metabolism, inositol phosphate metabolism, and the phosphatidylinositol signaling system (Figure 2; Supplementary Dataset 4). The data has been deposited in the Pathway Information of Kyoto Encyclopedia of Genes and Genomes (KEGG) of positively [file 2948973.f1.zip › supplementary files/Supplementary dataset 1 Orthologues genes of five nematodes (A. ceylanicum, B. malayi, C. elegans, T. spiralis and T. suis) for positive selection.xls]

## Sheet: 正选择同源基因 common_gene7
Orthologues genes of five nematodes for positive selection
T. spiralis	A. ceylanicum	B. malayi	C. elegans	T. suis
EFV46247	Acey_s0031.g2366.t3	Bm1893a	C01G10.11f	M51300170
EFV46270	Acey_s0462.g1890.t1	Bm4945	R13F6.6c	M51308028
EFV46287	Acey_s0019.g3853.t1	Bm14008	F10G8.6	M51305514
EFV46308	Acey_s0913.g3023.t1	Bm13778	C08A9.1	M51309570
EFV46321	Acey_s0066.g3709.t1	Bm6654a	Y48E1A.1a	M51306675
EFV46349	Acey_s0428.g1276.t3	Bm8586	ZK770.3	M51303075
EFV46359	Acey_s0005.g2440.t1	Bm5893	T21D12.4	M51306572
EFV46383	Acey_s0002.g668.t2	Bm2334	C24A11.9	M51301294
EFV46444	Acey_s0069.g400.t1	Bm6224	W07E6.1	M51311240
EFV46519	Acey_s0001.g131.t1	Bm6766	Y53G8AL.2	M51309890
EFV46538	Acey_s0074.g811.t2	Bm4086	F44E2.6b	M51313373
EFV46623	Acey_s0001.g310.t3	Bm3252	F10B5.4	M51301275
EFV46647	Acey_s0036.g3301.t1	Bm2591k	C34F11.3c	M51312277
EFV46690	Acey_s0311.g2129.t2	Bm7043	T19C3.4	M51311280
EFV46789	Acey_s0047.g1457.t1	Bm13811	T23G5.1	M51302104
EFV46889	Acey_s0110.g181.t1	Bm2172	C13C12.2	M51306715
EFV46911	Acey_s0191.g1308.t1	Bm2616	C35D10.4	M51303802
EFV46914	Acey_s0890.g2890.t1	Bm4821b	K04H4.2b	M51310144
EFV46951	Acey_s0932.g3100.t1	Bm4881e	C27B7.7a	M51311695
EFV46964	Acey_s0179.g719.t1	Bm13902	F53A3.3b	M51314014
EFV46996	Acey_s0153.g2927.t3	Bm13790	R160.1b	M51302160
EFV47014	Acey_s0571.g131.t1	Bm4100	K06C4.5	M51302949
EFV47048	Acey_s0571.g118.t1	Bm9762	F55G1.10	M51310119
EFV47286	Acey_s0003.g1559.t5	Bm6681	Y48G9A.4	M51312297
EFV47329	Acey_s0061.g3237.t2	Bm5981	T24C4.2	M51311745
EFV47343	Acey_s0021.g263.t1	Bm4669	H21P03.3c	M51304295
EFV47358	Acey_s0002.g532.t2	Bm5958	T23G5.2a	M51301341
EFV47368	Acey_s0038.g3665.t2	Bm7154a	Y39A3CL.5a	M51310306
EFV47489	Acey_s0074.g843.t4	Bm5594	T05G5.8b	M51303704
EFV47512	Acey_s0002.g576.t2	Bm4416	F55C5.8	M51307204
EFV47556	Acey_s0178.g654.t3	Bm10220	R09A1.1d	M51309647
EFV47608	Acey_s0015.g2677.t3	Bm5600	K08F9.2	M51310894
EFV47629	Acey_s0002.g656.t1	Bm11238	F27C1.7a	M51301934
EFV47704	Acey_s0316.g2288.t1	Bm4372	F54E4.1b	M51301314
EFV47705	Acey_s0642.g1041.t1	Bm4131b	F46A9.6	M51301998
EFV47721	Acey_s0011.g1372.t2	Bm5502	F56D2.7	M51302889
EFV47783	Acey_s0186.g1074.t2	Bm4772	K02G10.6	M51303557
EFV47803	Acey_s0463.g1915.t5	Bm1768j	B0348.4x	M51309244
EFV47832	Acey_s0098.g3096.t2	Bm4934	K08H2.6	M51305561
EFV47834	Acey_s0461.g1883.t1	Bm2142	ZC168.1	M51303281
EFV47850	Acey_s0302.g1862.t1	Bm3386	C53B4.6a	M51305352
EFV47885	Acey_s0078.g1149.t3	Bm2376	C25G4.10a	M51310630
EFV47939	Acey_s0007.g3397.t1	Bm2162	C12D8.11	M51300462
EFV47944	Acey_s0263.g610.t2	Bm2928b	K05C4.6b	M51300236
EFV47968	Acey_s0531.g3015.t2	Bm10359	W02B12.2	M51310495
EFV48013	Acey_s0068.g255.t1	Bm2972	C56C10.8	M51310146
EFV48046	Acey_s0051.g2071.t1	Bm13953	ZK863.3	M51311538
EFV48078	Acey_s0004.g1971.t4	Bm3790b	F33D4.5	M51300094
EFV48103	Acey_s0158.g3224.t1	Bm2874a	C50F4.5	M51311064
EFV48137	Acey_s0340.g2996.t4	Bm2879	C50F4.16	M51309223
EFV48146	Acey_s0004.g2171.t1	Bm5963	T08B2.5b	M51308311
EFV48151	Acey_s0249.g109.t1	Bm2459d	C29A12.3a	M51307663
EFV48171	Acey_s0081.g1484.t1	Bm5024e	K12H4.1	M51310712
EFV48180	Acey_s0025.g1163.t1	Bm4110	F45E12.3	M51300047
EFV48203	Acey_s0682.g1491.t1	Bm5173	R01H10.6	M51303147
EFV48228	Acey_s0048.g1645.t1	Bm6685	Y48G10A.3	M51308947
EFV48244	Acey_s0020.g177.t1	Bm4897y	K08B4.1a	M51311007
EFV48286	Acey_s0158.g3230.t1	Bm2950	C55A6.10a	M51309709
EFV48290	Acey_s0069.g371.t1	Bm8590	T17H7.4a	M51303675
EFV48380	Acey_s0053.g2363.t3	Bm3216c	M18.8	M51301398
EFV48437	Acey_s0035.g3067.t1	Bm6649	Y56A3A.27	M51308160
EFV48440	Acey_s0443.g1551.t3	Bm14758	T03G11.6	M51312293
EFV48442	Acey_s0021.g289.t1	Bm13835	C34E10.6	M51307106
EFV48460	Acey_s0023.g728.t1	Bm13901	T01C3.6	M51308161
EFV48461	Acey_s0004.g1783.t2	Bm6674	Y48G8AL.8b	M51308016
EFV48512	Acey_s0074.g815.t3	Bm1747	B0303.7b	M51301507
EFV48526	Acey_s0268.g804.t1	Bm3002	F28D1.9	M51300148
EFV48558	Acey_s0341.g3012.t1	Bm5085	C16C10.3	M51313817
EFV48562	Acey_s0020.g211.t2	Bm5066	Y6B3A.1a	M51301896
EFV48586	Acey_s0232.g3022.t5	Bm13728	T22B11.5a	M51304744
EFV48614	Acey_s0321.g2425.t4	Bm2319d	Y66H1B.2t	M51306700
EFV48623	Acey_s0310.g2104.t1	Bm2797	C46F11.6	M51308254
EFV48660	Acey_s0180.g824.t1	Bm9832	ZC101.1	M51306867
EFV48665	Acey_s0051.g2159.t1	Bm7466i	F25H5.1g	M51300204
EFV48706	Acey_s0026.g1335.t1	Bm6872	T28H10.1	M51312196
EFV48715	Acey_s0160.g3321.t3	Bm11258	F45H7.2d	M51305586
EFV48717	Acey_s0471.g2056.t2	Bm6984	C41D11.9	M51301374
EFV48761	Acey_s0893.g2902.t4	Bm5275	R07E4.1a	M51302926
EFV48772	Acey_s0168.g182.t2	Bm5393	ZK1248.17	M51304578
EFV48786	Acey_s0418.g1120.t2	Bm2095	C09D4.5	M51309207
EFV48808	Acey_s0034.g2800.t1	Bm4004i	C44B12.2a	M51309089
EFV48821	Acey_s0018.g3619.t3	Bm7141	Y75B8A.24	M51303380
EFV48926	Acey_s0625.g796.t10	Bm3524	Y53C10A.9	M51303807
EFV48928	Acey_s0531.g3033.t1	Bm2480	C18D11.4a	M51306081
EFV48930	Acey_s0139.g2128.t3	Bm7111	Y73E7A.3a	M51301105
EFV48950	Acey_s0337.g2901.t1	Bm6037b	T27A10.6	M51307713
EFV48961	Acey_s0151.g2793.t1	Bm2477c	C40H5.5a	M51310980
EFV48975	Acey_s0085.g1887.t2	Bm2484f	C30D11.1g	M51304553
EFV48994	Acey_s0001.g464.t1	Bm5092	F58A6.1	M51310289
EFV49012	Acey_s0021.g252.t1	Bm7108i	R107.8	M51303913
EFV49029	Acey_s0009.g559.t4	Bm6855	Y55F3AM.9a	M51310481
EFV49060	Acey_s0143.g2400.t5	Bm6241	W08F4.8b	M51304589
EFV49065	Acey_s0334.g2847.t1	Bm10052	C05D11.12	M51306951
EFV49104	Acey_s0002.g586.t1	Bm14723	Y69A2AL.2	M51305328
EFV49113	Acey_s0055.g2548.t2	Bm13816	Y41E3.4a	M51309698
EFV49123	Acey_s0033.g2787.t1	Bm2416e	C27A2.1	M51303583
EFV49171	Acey_s0293.g1618.t1	Bm7128	W09D6.6	M51302447
EFV49205	Acey_s0065.g3588.t5	Bm4581	F59A6.6b	M51301315
EFV49235	Acey_s0004.g1827.t3	Bm2548a	Y55D9A.2b	M51310010
EFV49243	Acey_s0418.g1116.t3	Bm4432a	C14A11.3b	M51312898
EFV49273	Acey_s0051.g2075.t1	Bm8402	T27A8.1	M51308273
EFV49278	Acey_s0049.g1821.t2	Bm6299	C33A12.7	M51307379
EFV49285	Acey_s0020.g230.t1	Bm1776a	B0361.8	M51305118
EFV49296	Acey_s0756.g2088.t2	Bm1686	B0025.2	M51303631
EFV49301	Acey_s0394.g637.t2	Bm4358	F54D1.6	M51311651
EFV49306	Acey_s0118.g728.t1	Bm7535	ZK686.4	M51303433
EFV49308	Acey_s0134.g1823.t1	Bm3306	F14H12.1	M51300117
EFV49309	Acey_s0099.g3209.t1	Bm5988	T24F1.1	M51309887
EFV49315	Acey_s0016.g3164.t1	Bm1842	B0511.12b	M51308640
EFV49318	Acey_s0078.g1153.t1	Bm7853	F35G2.1b	M51307644
EFV49322	Acey_s0061.g3275.t3	Bm2168e	C13B9.4e	M51306298
EFV49326	Acey_s0161.g3365.t1	Bm5808	T16A9.4a	M51305499
EFV49327	Acey_s0366.g8.t2	Bm7030	Y71F9AL.1	M51300120
EFV49376	Acey_s0288.g1468.t2	Bm4745	K02B2.3	M51310288
EFV49393	Acey_s0629.g847.t2	Bm6403	Y37E11AR.2	M51310134
EFV49402	Acey_s0120.g955.t3	Bm4680	Y47G6A.11	M51304303
EFV49415	Acey_s0132.g1701.t2	Bm9505	T01H10.8	M51303480
EFV49435	Acey_s0431.g1325.t1	Bm13731c	Y39G10AR.8	M51300791
EFV49444	Acey_s0037.g3420.t4	Bm2155	C11H1.3	M51307595
EFV49456	Acey_s0151.g2807.t2	Bm3856	F35H12.3	M51301608
EFV49476	Acey_s0121.g957.t1	Bm2968d	C56A3.8c	M51301037
EFV49477	Acey_s0007.g3199.t4	Bm5857	T20B12.3	M51313696
EFV49499	Acey_s0024.g910.t1	Bm5604	T05H10.5c	M51313987
EFV49508	Acey_s0368.g63.t1	Bm14080b	F32D8.6	M51306553
EFV49527	Acey_s0333.g2798.t1	Bm5433	R151.6	M51305914
EFV49537	Acey_s0546.g3258.t3	Bm3319	F12B6.1b	M51303630
EFV49567	Acey_s0282.g1279.t4	Bm3398	F15G9.4d	M51307492
EFV49608	Acey_s0122.g1037.t1	Bm14019	F09E5.8	M51300247
EFV49612	Acey_s0044.g973.t3	Bm3822	F35B12.10a	M51314142
EFV49637	Acey_s0727.g1882.t1	Bm3295	F11A10.2	M51304743
EFV49642	Acey_s0118.g721.t1	Bm6809a	Y54F10AM.2c	M51306343
EFV49643	Acey_s0013.g1924.t2	Bm4756	K02D7.1a	M51307301
EFV49650	Acey_s0363.g3535.t3	Bm6667c	Y48G1C.4a	M51310187
EFV49666	Acey_s0063.g3467.t2	Bm7222	Y73B3B.1	M51306646
EFV49690	Acey_s0116.g540.t1	Bm5187	F42D1.2	M51307452
EFV49715	Acey_s0003.g1252.t1	Bm13860	Y69A2AR.18a	M51301624
EFV49737	Acey_s0014.g2319.t1	Bm4561	F58G6.1	M51307062
EFV49745	Acey_s0315.g2269.t2	Bm13710	F23B12.6	M51307701
EFV49764	Acey_s0015.g2800.t1	Bm7168	Y82E9BR.18	M51311951
EFV49768	Acey_s0266.g696.t1	Bm4000	Y39A1A.1c	M51305615
EFV49855	Acey_s0306.g1978.t1	Bm12436	Y65B4A.9b	M51306384
EFV49875	Acey_s0039.g165.t1	Bm4552	F55H12.3	M51306328
EFV49884	Acey_s0019.g3806.t1	Bm11274	T14F9.5	M51308235
EFV49905	Acey_s0375.g244.t2	Bm7040	Y71F9AM.6	M51301732
EFV49922	Acey_s0327.g2616.t4	Bm13813f	M03C11.2	M51313882
EFV49924	Acey_s0043.g858.t1	Bm10477d	C17H12.3	M51306638
EFV49949	Acey_s0159.g3285.t1	Bm1672	Y42G9A.3a	M51306000
EFV49955	Acey_s0041.g349.t1	Bm3402	F16A11.2	M51307418
EFV50046	Acey_s0103.g3529.t2	Bm7367	ZC302.1	M51310167
EFV50049	Acey_s0011.g1433.t1	Bm14031	ZC395.7	M51301285
EFV50052	Acey_s0048.g1608.t2	Bm6959	Y63D3A.4	M51309984
EFV50053	Acey_s0239.g3309.t1	Bm2304	C18E9.4	M51302630
EFV50058	Acey_s0047.g1477.t1	Bm3612	F26D10.9a	M51302264
EFV50066	Acey_s0002.g707.t4	Bm11411	T12A7.1	M51310381
EFV50078	Acey_s0032.g2494.t1	Bm3729b	F31D5.3d	M51302027
EFV50166	Acey_s0537.g3108.t1	Bm6837a	Y54H5A.3	M51304552
EFV50168	Acey_s0087.g2087.t2	Bm6869	Y56A3A.2	M51304778
EFV50191	Acey_s0185.g1022.t1	Bm6889k	C14F11.1b	M51305696
EFV50200	Acey_s0006.g3042.t1	Bm8131	F52B10.2	M51301850
EFV50218	Acey_s0015.g2675.t2	Bm5369	R12E2.12	M51301391
EFV50220	Acey_s0016.g3134.t1	Bm5355	R11G1.6c	M51307075
EFV50242	Acey_s0210.g2127.t3	Bm5209	T12A7.6	M51305362
EFV50256	Acey_s0027.g1536.t4	Bm6909	Y37E3.5b	M51302621
EFV50259	Acey_s0772.g2228.t6	Bm6719d	Y51A2D.19k	M51304764
EFV50268	Acey_s0253.g277.t1	Bm9199e	F35G12.3a	M51300408
EFV50270	Acey_s0540.g3169.t1	Bm13782	B0403.2	M51302193
EFV50271	Acey_s0124.g1185.t5	Bm2813	C47D12.8	M51303894
EFV50276	Acey_s0370.g108.t7	Bm13195	B0416.1	M51304278
EFV50278	Acey_s0901.g2956.t1	Bm4398	F55A11.1	M51305933
EFV50279	Acey_s0014.g2212.t5	Bm4277	W09H1.6a	M51310407
EFV50283	Acey_s0191.g1327.t3	Bm7236	Y105E8A.14	M51303921
EFV50291	Acey_s0010.g1155.t1	Bm2443	C27H6.1b	M51309799
EFV50292	Acey_s0358.g3401.t4	Bm5229	D2096.3	M51311125
EFV50305	Acey_s0044.g1046.t1	Bm6051	T27F2.1	M51311260
EFV50309	Acey_s0014.g2237.t1	Bm6724	Y51H1A.3a	M51301072
EFV50310	Acey_s0038.g3645.t3	Bm4527d	K03B8.3	M51304535
EFV50315	Acey_s0367.g36.t4	Bm13799	F44B9.8	M51303014
EFV50316	Acey_s0052.g2239.t2	Bm2557	R04D3.1	M51301895
EFV50329	Acey_s0209.g2100.t1	Bm4474	T10B10.2	M51301857
EFV50332	Acey_s0205.g1947.t1	Bm1701	B0041.6b	M51301858
EFV50357	Acey_s0112.g337.t1	Bm1730	C29F3.1	M51312654
EFV50370	Acey_s0283.g1329.t2	Bm2238	C16A3.7	M51302206
EFV50373	Acey_s0060.g3122.t3	Bm13774d	F10B5.1	M51311493
EFV50374	Acey_s0003.g1229.t1	Bm4323	F53G12.10	M51300922
EFV50384	Acey_s0037.g3470.t1	Bm4511	F57B9.1	M51309888
EFV50386	Acey_s0074.g862.t1	Bm6296	Y16B4A.1	M51313194
EFV50387	Acey_s0001.g183.t6	Bm6382	C34H3.1	M51303209
EFV50392	Acey_s0008.g55.t1	Bm9789	R13F6.10	M51303195
EFV50394	Acey_s0347.g3160.t4	Bm12552	C26E6.9a	M51303360
EFV50397	Acey_s0001.g37.t2	Bm3431	F18C5.3	M51301381
EFV50398	Acey_s0212.g2260.t1	Bm12210	C55B7.8	M51310581
EFV50422	Acey_s0100.g3306.t1	Bm2301	C18D11.1	M51308140
EFV50452	Acey_s0010.g1222.t3	Bm5554	T04F8.2	M51301714
EFV50459	Acey_s0206.g1998.t2	Bm6602	Y47D3A.27	M51306380
EFV50471	Acey_s0189.g1178.t4	Bm6715	Y50E8A.4b	M51312308
EFV50474	Acey_s0141.g2226.t1	Bm8176	C23G10.8	M51304531
EFV50493	Acey_s0014.g2287.t1	Bm3922	F38G1.2	M51307046
EFV50495	Acey_s0334.g2849.t2	Bm12185	T26A5.7b	M51300630
EFV50496	Acey_s0334.g2852.t1	Bm3474e	F20H11.2	M51300629
EFV50515	Acey_s0174.g477.t2	Bm4608	F59G1.3	M51311224
EFV50517	Acey_s0171.g317.t2	Bm2213	C15C6.4	M51306346
EFV50555	Acey_s0214.g2340.t1	Bm4007	F41H10.6d	M51301571
EFV50560	Acey_s0019.g3821.t4	Bm11943	T07A9.9a	M51305041
EFV50571	Acey_s0207.g2014.t1	Bm6213	W06E11.4	M51308323
EFV50579	Acey_s0289.g1506.t3	Bm8323	C06G1.5a	M51311787
EFV50583	Acey_s0185.g1017.t2	Bm2039c	Y48G1A.4	M51312286
EFV50595	Acey_s0091.g2445.t1	Bm4766	K02F2.3	M51300389
EFV50598	Acey_s0081.g1443.t2	Bm11987	C30A5.3	M51306376
EFV50617	Acey_s0043.g892.t1	Bm6114	W02A11.1	M51313729
EFV50618	Acey_s0022.g600.t1	Bm2435	C27F2.5	M51307117
EFV50621	Acey_s0065.g3576.t2	Bm6305	Y17G7B.13	M51310045
EFV50626	Acey_s0032.g2587.t1	Bm5095	M04C9.3b	M51309891
EFV50630	Acey_s0215.g2365.t3	Bm6397	Y37E3.15a	M51307621
EFV50632	Acey_s0005.g2540.t2	Bm7175	F55F8.5	M51305461
EFV50642	Acey_s0226.g2769.t1	Bm13785b	F42A10.1	M51311612
EFV50644	Acey_s0548.g3281.t4	Bm3786	Y39B6A.6	M51304842
EFV50648	Acey_s0187.g1118.t1	Bm6491	F54F7.7	M51310168
EFV50649	Acey_s0185.g1016.t1	Bm14029	F46H6.1	M51308809
EFV50651	Acey_s0002.g929.t3	Bm12350	Y73B6BL.1	M51303173
EFV50652	Acey_s0062.g3386.t1	Bm4519a	Y47G6A.8	M51309205
EFV50654	Acey_s0031.g2277.t2	Bm2272	C17G10.1	M51306134
EFV50655	Acey_s0039.g83.t1	Bm7656	B0432.5a	M51309082
EFV50658	Acey_s0053.g2384.t1	Bm5915c	T22C1.3	M51301576
EFV50659	Acey_s0454.g1733.t1	Bm7207	F01D5.8a	M51301575
EFV50660	Acey_s0004.g1997.t2	Bm6737	F58B4.2	M51308520
EFV50680	Acey_s0204.g1880.t1	Bm7285	Y110A7A.19	M51303041
EFV50700	Acey_s0007.g3539.t1	Bm3035	Y71A12C.2	M51311793
EFV50701	Acey_s0002.g829.t1	Bm3651	F27D4.4a	M51304358
EFV50703	Acey_s0254.g284.t1	Bm2413d	K02E10.8b	M51311795
EFV50718	Acey_s0004.g1910.t1	Bm10408	F22B5.7	M51307053
EFV50728	Acey_s0016.g3154.t1	Bm4824	K05B2.2a	M51307054
EFV50746	Acey_s0076.g1048.t1	Bm3716h	F31B12.1a	M51301694
EFV50761	Acey_s0008.g251.t1	Bm6542	Y43F4B.10	M51308258
EFV50768	Acey_s0052.g2240.t2	Bm1882	C01G5.6	M51301504
EFV50852	Acey_s0226.g2771.t1	Bm6523b	Y41E3.10a	M51311507
EFV50856	Acey_s0026.g1410.t1	Bm7666b	ZK1307.9	M51311502
EFV50886	Acey_s0005.g2262.t1	Bm5835	T19B10.3	M51308701
EFV50896	Acey_s0035.g3097.t2	Bm8939	F56E10.2c	M51301679
EFV50920	Acey_s0724.g1852.t2	Bm5626	T07A5.2	M51312592
EFV50934	Acey_s0401.g792.t1	Bm6692	H06H21.10b	M51306849
EFV50939	Acey_s0011.g1368.t1	Bm10594a	C56G2.15	M51305580
EFV50948	Acey_s0058.g2936.t1	Bm3250	F10B5.2	M51301293
EFV50975	Acey_s0020.g142.t1	Bm7302	Y113G7B.17	M51309184
EFV50984	Acey_s0639.g988.t1	Bm3597	C50D2.1a	M51313460
EFV50985	Acey_s0596.g447.t1	Bm12018	Y105E8A.9	M51302190
EFV50992	Acey_s0108.g48.t1	Bm12652	C14B9.7	M51301625
EFV51031	Acey_s0010.g1221.t1	Bm5428	R148.5a	M51303677
EFV51048	Acey_s0327.g2610.t2	Bm13988b	T16H12.4	M51310027
EFV51059	Acey_s0647.g1099.t4	Bm13797	T20G5.1	M51311620
EFV51093	Acey_s0053.g2296.t2	Bm6128	Y73E7A.7a	M51303478
EFV51097	Acey_s0090.g2331.t2	Bm8165	F35G12.6	M51303479
EFV51123	Acey_s0604.g547.t1	Bm14726	F37C12.4	M51313789
EFV51143	Acey_s0046.g1334.t3	Bm10269b	F54D7.2	M51302950
EFV51148	Acey_s0009.g721.t5	Bm6390	Y37D8A.22	M51303054
EFV51149	Acey_s0122.g1065.t2	Bm13839	T03F1.3	M51303055
EFV51151	Acey_s0014.g2445.t1	Bm4699f	ZC449.1	M51311790
EFV51173	Acey_s0242.g3410.t3	Bm3961b	F40E10.6	M51306108
EFV51193	Acey_s0074.g840.t1	Bm5870c	T20G5.6	M51304538
EFV51201	Acey_s0008.g352.t1	Bm9237b	Y53F4B.22a	M51309628
EFV51202	Acey_s0022.g597.t1	Bm13867	C27F2.4	M51305564
EFV51203	Acey_s0008.g245.t1	Bm6511	Y41C4A.9	M51305566
EFV51222	Acey_s0054.g2488.t2	Bm3747	F32A7.4	M51306160
EFV51225	Acey_s0081.g1463.t4	Bm9719	Y67D2.2	M51304966
EFV51228	Acey_s0072.g642.t5	Bm6449	Y39A1A.14	M51306999
EFV51271	Acey_s0089.g2260.t1	Bm4409	F55B12.4	M51308259
EFV51272	Acey_s0009.g781.t1	Bm4208	F48E8.2	M51307006
EFV51273	Acey_s0835.g2599.t1	Bm3018	D1054.3a	M51307005
EFV51274	Acey_s0320.g2402.t2	Bm14005	K12H4.3	M51308257
EFV51305	Acey_s0096.g2879.t1	Bm9735	T01G9.6a	M51301683
EFV51308	Acey_s0014.g2334.t1	Bm6252	W09C5.8	M51305486
EFV51309	Acey_s0240.g3352.t4	Bm6414	Y38A10A.7	M51305331
EFV51311	Acey_s0033.g2721.t4	Bm4951b	T11F9.6	M51300449
EFV51313	Acey_s0033.g2731.t1	Bm13960	T20G5.2	M51308268
EFV51321	Acey_s0001.g386.t5	Bm6792	Y54E10A.2	M51310287
EFV51322	Acey_s0189.g1188.t2	Bm6729g	Y51H4A.17c	M51301707
EFV51324	Acey_s0145.g2494.t1	Bm13781b	F25H2.5	M51301706
EFV51327	Acey_s0014.g2291.t2	Bm5074	M03A8.2	M51301710
EFV51365	Acey_s0170.g251.t2	Bm5165	F58H7.3	M51308513
EFV51366	Acey_s0024.g907.t2	Bm1822	B0491.4	M51307337
EFV51367	Acey_s0051.g2098.t1	Bm6736	Y52B11A.2a	M51301709
EFV51368	Acey_s0287.g1431.t2	Bm4967	K10B2.4	M51301543
EFV51374	Acey_s0015.g2692.t1	Bm7054b	Y71G12B.11e	M51304603
EFV51389	Acey_s0104.g3638.t1	Bm3730a	C36F7.1	M51302782
EFV51418	Acey_s0178.g663.t1	Bm7246g	Y105E8B.1q	M51305923
EFV51426	Acey_s0295.g1650.t2	Bm4849	K07A1.8	M51305374
EFV51434	Acey_s0293.g1615.t1	Bm6189	W05B5.1e	M51301117
EFV51436	Acey_s0049.g1738.t1	Bm7109	Y73E7A.1b	M51312105
EFV51437	Acey_s0048.g1721.t4	Bm13990a	Y48B6A.13a	M51308958
EFV51439	Acey_s0228.g2871.t3	Bm6024	T26C5.3d	M51313681
EFV51453	Acey_s0181.g864.t2	Bm6969a	Y65B4A.1	M51304685
EFV51477	Acey_s0027.g1543.t1	Bm11095	F32G8.5	M51310462
EFV51487	Acey_s0314.g2233.t1	Bm8954	T24C2.1	M51301278
EFV51492	Acey_s0174.g467.t4	Bm4607	F59G1.1d	M51302839
EFV51503	Acey_s0070.g496.t1	Bm4887	K07G5.2	M51305874
EFV51508	Acey_s0287.g1438.t1	Bm10428	Y110A2AR.3a	M51302042
EFV51534	Acey_s0251.g193.t1	Bm6891	Y57A10A.23	M51310740
EFV51535	Acey_s0175.g506.t2	Bm10790	D2030.2b	M51306232
EFV51541	Acey_s0947.g3162.t1	Bm9892	Y73C8C.7	M51305778
EFV51542	Acey_s0088.g2180.t1	Bm2532	C33C12.9	M51301290
EFV51544	Acey_s0163.g3509.t1	Bm4812	K04G2.6	M51301937
EFV51546	Acey_s0040.g303.t2	Bm6014	K06A5.6	M51310466
EFV51558	Acey_s0022.g456.t1	Bm1808	B0432.7a	M51301867
EFV51562	Acey_s0014.g2481.t1	Bm6210	W06D4.5	M51301154
EFV51563	Acey_s0056.g2693.t1	Bm3676b	F28D9.1	M51306222
EFV51565	Acey_s0032.g2590.t3	Bm3403b	F16A11.3c	M51302751
EFV51566	Acey_s0032.g2595.t3	Bm2997	D1007.5a	M51304135
EFV51596	Acey_s0035.g3131.t1	Bm13678i	F28H1.3	M51311103
EFV51598	Acey_s0139.g2111.t1	Bm6584	Y46G5A.17	M51300370
EFV51618	Acey_s0175.g483.t1	Bm5042	M01E5.5a	M51305708
EFV51623	Acey_s0322.g2466.t2	Bm1865	C09B8.1	M51304787
EFV51636	Acey_s0562.g3499.t3	Bm2211	C15A11.3	M51313790
EFV51659	Acey_s0478.g2191.t1	Bm5423p	T12F5.5a	M51312579
EFV51677	Acey_s0097.g2968.t1	Bm5528	T04A8.7a	M51308215
EFV51698	Acey_s0576.g203.t4	Bm5611	T06D8.1a	M51309606
EFV51721	Acey_s0399.g738.t1	Bm4492	M01A10.2h	M51307912
EFV51734	Acey_s0248.g96.t2	Bm6148	W02H5.8	M51307655
EFV51735	Acey_s0226.g2768.t2	Bm5714a	C16C10.1	M51302468
EFV51739	Acey_s0010.g971.t2	Bm1866	C01B10.8	M51306592
EFV51745	Acey_s0019.g3887.t1	Bm5073d	R05D8.7	M51305413
EFV51750	Acey_s0007.g3240.t3	Bm13977b	T09A5.11	M51300491
EFV51754	Acey_s0068.g254.t3	Bm2971e	C56C10.7c	M51309617
EFV51763	Acey_s0001.g354.t1	Bm7226	C15H11.2a	M51301100
EFV51769	Acey_s0172.g381.t1	Bm6609i	F44G3.6	M51300756
EFV51773	Acey_s0115.g508.t1	Bm7081	Y71H2AR.3	M51307335
EFV51783	Acey_s0492.g2416.t1	Bm4998	K11C4.4	M51302210
EFV51786	Acey_s0335.g2869.t2	Bm4107	F45E10.1h	M51300457
EFV51796	Acey_s0343.g3062.t2	Bm5376	R13A5.1b	M51305378
EFV51808	Acey_s0085.g1879.t1	Bm3748	F32A11.1	M51304865
EFV51810	Acey_s0002.g512.t1	Bm7506b	ZK632.3	M51305420
EFV51813	Acey_s0074.g892.t2	Bm2901	C52E12.3	M51304687
EFV51842	Acey_s0490.g2378.t1	Bm8440	W05H5.3	M51302546
EFV51845	Acey_s0011.g1333.t1	Bm4407	F55A12.9c	M51302070
EFV51851	Acey_s0083.g1661.t2	Bm1739	B0457.1a	M51302654
EFV51871	Acey_s0003.g1641.t1	Bm9838	C32F10.8b	M51307294
EFV51875	Acey_s0025.g1266.t1	Bm6013	T25G3.4	M51302379
EFV51897	Acey_s0013.g2068.t1	Bm5969b	T23G11.7b	M51307083
EFV51898	Acey_s0234.g3155.t2	Bm14033a	F23C8.6	M51306908
EFV51909	Acey_s0070.g417.t1	Bm11326	C31C9.1b	M51313981
EFV51914	Acey_s0086.g1909.t2	Bm14038a	F21C3.3	M51301256
EFV51915	Acey_s0258.g451.t1	Bm11471	ZK337.1a	M51305953
EFV51928	Acey_s0204.g1868.t1	Bm4692b	H37N21.1	M51310488
EFV51929	Acey_s0196.g1545.t2	Bm2131	C10E2.3a	M51308130
EFV51942	Acey_s0064.g3494.t1	Bm7345	ZC97.1a	M51302167
EFV51950	Acey_s0068.g187.t1	Bm3542	F23F1.4	M51312137
EFV51952	Acey_s0058.g2851.t3	Bm3044a	D2030.4	M51305421
EFV51954	Acey_s0907.g2974.t1	Bm3153	F02E9.4b	M51300285
EFV51955	Acey_s0234.g3158.t1	Bm2512	C32E8.3	M51300915
EFV51962	Acey_s0029.g1926.t1	Bm6290	F25B5.3d	M51302552
EFV51964	Acey_s0428.g1286.t1	Bm7194	Y92H12BR.8	M51302575
EFV51982	Acey_s0032.g2497.t1	Bm12043	C26D10.3	M51305876
EFV51984	Acey_s0007.g3458.t2	Bm5096	M04F3.4a	M51313196
EFV51987	Acey_s0049.g1796.t1	Bm3780	F33A8.1	M51302378
EFV52002	Acey_s0037.g3512.t1	Bm4481	F56D12.4a	M51307361
EFV52004	Acey_s0087.g2057.t2	Bm1737	B0285.5	M51301980
EFV52010	Acey_s0298.g1745.t2	Bm11315	C56G2.5	M51301726
EFV52019	Acey_s0418.g1116.t7	Bm12268	C14A11.3a	M51313919
EFV52023	Acey_s0073.g724.t2	Bm6646	Y48C3A.8a	M51301121
EFV52027	Acey_s0234.g3128.t3	Bm3619b	F26E4.7b	M51301169
EFV52032	Acey_s0011.g1296.t4	Bm11194	R12E2.3	M51306217
EFV52052	Acey_s0091.g2423.t2	Bm4268	F52F12.6a	M51304014
EFV52061	Acey_s0466.g1958.t2	Bm4706	JC8.5a	M51300938
EFV52066	Acey_s0536.g3100.t1	Bm1971	C05D9.1	M51305880
EFV52069	Acey_s0133.g1751.t2	Bm6188a	W04H10.3b	M51312566
EFV52074	Acey_s0642.g1029.t1	Bm7035	Y71F9AL.14	M51302735
EFV52077	Acey_s0014.g2441.t1	Bm5506	T03F1.1	M51309541
EFV52079	Acey_s0384.g397.t5	Bm2970	R12C12.5	M51301191
EFV52084	Acey_s0104.g3603.t2	Bm4516	C27D6.4a	M51302102
EFV52088	Acey_s0559.g3439.t1	Bm6319a	Y18D10A.17	M51302675
EFV52090	Acey_s0135.g1922.t1	Bm8133	C01B7.6	M51303239
EFV52092	Acey_s0009.g402.t1	Bm13163	D2007.4	M51300732
EFV52103	Acey_s0006.g2856.t1	Bm11335	F18C12.2a	M51306168
EFV52135	Acey_s0330.g2691.t4	Bm3414	C10F3.3	M51309100
EFV52141	Acey_s0561.g3477.t2	Bm5048	M01E11.7a	M51301015
EFV52152	Acey_s0409.g934.t2	Bm11275	B0034.3a	M51306888
EFV52155	Acey_s0001.g249.t1	Bm1736	ZK970.2d	M51300287
EFV52161	Acey_s0099.g3199.t1	Bm8371d	K11B4.1	M51301192
EFV52166	Acey_s0339.g2953.t1	Bm4355	F54C9.11	M51301992
EFV52168	Acey_s0280.g1219.t1	Bm2629b	C36B7.5b	M51303784
EFV52172	Acey_s0054.g2508.t1	Bm5678	T08G11.1a	M51300307
EFV52174	Acey_s0019.g3825.t1	Bm3781	F46F11.2	M51308773
EFV52187	Acey_s0326.g2567.t1	Bm7669b	C44B7.10	M51301126
EFV52191	Acey_s0083.g1650.t4	Bm6579	F35H12.2b	M51301803
EFV52193	Acey_s0031.g2369.t3	Bm13969	C01G10.10a	M51306135
EFV52194	Acey_s0076.g1034.t2	Bm3531	R03E9.3d	M51302728
EFV52201	Acey_s0086.g1917.t1	Bm4188	F47G4.6	M51310750
EFV52206	Acey_s0003.g1452.t3	Bm8092b	C36B1.1d	M51301148
EFV52218	Acey_s0760.g2120.t1	Bm5438	R155.1b	M51302738
EFV52224	Acey_s0150.g2757.t1	Bm6886	Y57A10A.28	M51300309
EFV52239	Acey_s0003.g1339.t4	Bm7078a	Y71H2AM.20a	M51307164
EFV52245	Acey_s0003.g1207.t2	Bm7158	C44E4.1b	M51300984
EFV52248	Acey_s0065.g3610.t1	Bm3368b	F14E5.2b	M51302606
EFV52253	Acey_s0055.g2571.t1	Bm3892	F37C12.1	M51311988
EFV52254	Acey_s0086.g1959.t2	Bm4390	F55A3.3	M51312789
EFV52255	Acey_s0070.g455.t1	Bm6910	ZC101.3	M51301181
EFV52257	Acey_s0001.g11.t2	Bm4876a	K07D4.7a	M51309612
EFV52260	Acey_s0159.g3263.t1	Bm7155b	Y77E11A.13b	M51308541
EFV52269	Acey_s0144.g2466.t2	Bm7591b	ZK930.3a	M51301042
EFV52284	Acey_s0022.g604.t4	Bm2405	C26E6.6	M51304886
EFV52291	Acey_s0224.g2726.t1	Bm5514	T04A8.9	M51302828
EFV52292	Acey_s0069.g324.t2	Bm2865	C50D2.7	M51308082
EFV52301	Acey_s0460.g1866.t1	Bm5414	D2089.1b	M51310013
EFV52302	Acey_s0287.g1453.t1	Bm11705	F42A8.1	M51307066
EFV52315	Acey_s0049.g1822.t1	Bm6300b	Y17G7B.2c	M51302173
EFV52325	Acey_s0314.g2213.t4	Bm7870	F53B6.2a	M51306241
EFV52327	Acey_s0028.g1665.t1	Bm3075	DY3.6	M51301068
EFV52329	Acey_s0480.g2237.t5	Bm12233	F20D12.2	M51309434
EFV52332	Acey_s0097.g2982.t2	Bm7151	Y76B12C.7b	M51311699
EFV52337	Acey_s0841.g2626.t1	Bm14071	C52E4.3	M51311544
EFV52363	Acey_s0021.g315.t1	Bm6026	T26C12.1	M51307369
EFV52369	Acey_s0267.g762.t1	Bm5542c	F49E11.1i	M51310155
EFV52374	Acey_s0068.g186.t4	Bm3543	F23F1.5	M51304189
EFV52385	Acey_s0066.g3785.t1	Bm13880	Y17G7B.7	M51301417
EFV52403	Acey_s0063.g3408.t1	Bm12335	F07A5.7a	M51309747
EFV52405	Acey_s0155.g3050.t1	Bm5694	T09B4.9	M51304027
EFV52412	Acey_s0669.g1364.t1	Bm8347	T22C1.7	M51302087
EFV52419	Acey_s0293.g1618.t3	Bm7126	Y74C10AL.2	M51304615
EFV52426	Acey_s0010.g865.t1	Bm7059	Y71G12B.16	M51309532
EFV52428	Acey_s0002.g661.t1	Bm13676	F25H2.9	M51311201
EFV52429	Acey_s0181.g835.t1	Bm14003b	C30F8.2	M51304599
EFV52437	Acey_s0559.g3451.t4	Bm4653	R13A1.2e	M51302726
EFV52447	Acey_s0002.g514.t6	Bm7696	F57B9.2	M51312649
EFV52476	Acey_s0038.g3664.t1	Bm15491	F10C2.6	M51310962
EFV52480	Acey_s0110.g138.t1	Bm5227a	R05F9.1a	M51308084
EFV52483	Acey_s0012.g1696.t1	Bm2183b	C14A4.4a	M51304160
EFV52490	Acey_s0459.g1840.t4	Bm2093	C09D4.1a	M51300396
EFV52497	Acey_s0236.g3233.t1	Bm6317	Y18D10A.13	M51301951
EFV52518	Acey_s0704.g1681.t1	Bm4684h	Y39H10A.3a	M51311696
EFV52537	Acey_s0113.g408.t1	Bm7282b	Y110A7A.13	M51300996
EFV52538	Acey_s0020.g101.t1	Bm7210	Y97E10AR.6	M51304012
EFV52547	Acey_s0006.g2919.t1	Bm2065	C08B11.3	M51301035
EFV52550	Acey_s0176.g537.t1	Bm6626	Y47G6A.23d	M51308923
EFV52559	Acey_s0011.g1289.t2	Bm2781	F36A2.2	M51303514
EFV52578	Acey_s0288.g1475.t1	Bm4069	F49D11.8	M51306231
EFV52580	Acey_s0401.g786.t2	Bm2517	C32E8.10h	M51300514
EFV52581	Acey_s0068.g206.t1	Bm10341	B0286.4d	M51300883
EFV52589	Acey_s0175.g516.t3	Bm11784	ZK524.2f	M51309522
EFV52590	Acey_s0086.g1966.t1	Bm1699	B0041.3	M51312135
EFV52591	Acey_s0141.g2272.t1	Bm3565	Y92H12BL.1a	M51304096
EFV52597	Acey_s0004.g2124.t2	Bm3691	Y57G11C.42a	M51302249
EFV52599	Acey_s0128.g1426.t6	Bm6543a	Y43F8A.5	M51300482
EFV52604	Acey_s0012.g1835.t2	Bm8813	C49A1.4a	M51302685
EFV52607	Acey_s0203.g1819.t1	Bm7606	ZK1010.2	M51302489
EFV52612	Acey_s0021.g407.t1	Bm4236	Y56A3A.28	M51302601
EFV52618	Acey_s0007.g3268.t3	Bm13879	Y22D7AL.10	M51308263
EFV52619	Acey_s0009.g823.t1	Bm11501	Y51F10.4a	M51302197
EFV52620	Acey_s0245.g3542.t2	Bm12948	T01B7.4	M51302157
EFV52626	Acey_s0142.g2342.t4	Bm14824a	ZK816.5	M51301979
EFV52642	Acey_s0369.g76.t1	Bm3061	D2092.1b	M51301255
EFV52650	Acey_s0827.g2553.t5	Bm2262a	R10E9.1	M51311126
EFV52660	Acey_s0008.g110.t2	Bm12859d	C02E11.1a	M51308355
EFV52663	Acey_s0091.g2432.t1	Bm11555	Y105E8A.6	M51312760
EFV52676	Acey_s0361.g3465.t2	Bm12633	ZK632.6b	M51313075
EFV52681	Acey_s0270.g869.t1	Bm6701	Y50C1A.1b	M51301160
EFV52683	Acey_s0008.g12.t1	Bm4547	F58B3.7	M51310459
EFV52690	Acey_s0022.g551.t5	Bm13806	Y105E8A.10b	M51304924
EFV52694	Acey_s0050.g1984.t4	Bm7813a	T23D8.8	M51304862
EFV52697	Acey_s0041.g350.t3	Bm3401	F16A11.1a	M51306931
EFV52699	Acey_s0483.g2297.t1	Bm13986	C01F1.2	M51304858
EFV52702	Acey_s0053.g2349.t1	Bm5532	T04A8.11	M51304856
EFV52706	Acey_s0506.g2682.t4	Bm12794a	C28H8.5a	M51300580
EFV52708	Acey_s0017.g3325.t3	Bm3546	F54B11.6	M51303670
EFV52712	Acey_s1056.g3509.t1	Bm12958a	Y62E10A.17a	M51302420
EFV52719	Acey_s0171.g314.t3	Bm2119	C09H6.2c	M51301284
EFV52722	Acey_s0326.g2573.t1	Bm14011a	F42A8.2	M51302736
EFV52729	Acey_s0016.g2912.t1	Bm13948	F22B5.9	M51313465
EFV52737	Acey_s0013.g2140.t1	Bm2303	C18E9.2a	M51302754
EFV52749	Acey_s0093.g2642.t3	Bm8584	F44A2.2	M51307997
EFV52750	Acey_s0066.g3776.t2	Bm11432	E02H1.6	M51306593
EFV52753	Acey_s0068.g277.t1	Bm4830c	K05F1.5	M51300375
EFV52755	Acey_s0011.g1448.t2	Bm13757a	Y48C3A.7	M51303703
EFV52757	Acey_s0423.g1209.t1	Bm6240a	W08F4.6	M51302254
EFV52758	Acey_s0001.g264.t3	Bm4665	H20J04.6	M51304069
EFV52759	Acey_s0024.g952.t1	Bm1750a	B0304.1a	M51301253
EFV52765	Acey_s0016.g3057.t2	Bm14015a	T24H7.1	M51300270
EFV52768	Acey_s0112.g336.t6	Bm1843	B0511.13a	M51304643
EFV52770	Acey_s0038.g3623.t1	Bm2439	C27H5.1	M51305198
EFV52781	Acey_s0008.g361.t2	Bm13746b	R05F9.6	M51308234
EFV52783	Acey_s0317.g2317.t2	Bm5403	R53.4	M51304943
EFV52792	Acey_s0050.g2021.t1	Bm6759	F58H7.2	M51308981
EFV52803	Acey_s0073.g781.t2	Bm14771	F57F10.1b	M51305414
EFV52807	Acey_s0305.g1970.t1	Bm4826	K05C4.2	M51307338
EFV52808	Acey_s0134.g1881.t3	Bm4723c	Y57A10A.24	M51309580
EFV52813	Acey_s0012.g1698.t4	Bm2188	C14A4.14	M51300839
EFV52814	Acey_s0012.g1697.t1	Bm2182	C14A4.3	M51302093
EFV52816	Acey_s0104.g3625.t2	Bm1595	F27E5.1	M51300388
EFV52821	Acey_s0011.g1546.t3	Bm3179	F08B4.1b	M51301197
EFV52822	Acey_s0389.g531.t1	Bm13965	T21B10.2b	M51309564
EFV52829	Acey_s0522.g2907.t1	Bm6682	Y48G9A.8	M51305936
EFV52831	Acey_s0197.g1548.t1	Bm3695	F29F11.1	M51300451
EFV52845	Acey_s0222.g2631.t1	Bm4605	F02D10.1	M51309604
EFV52847	Acey_s0649.g1114.t2	Bm3138	C28H8.3	M51300276
EFV52856	Acey_s0424.g1212.t1	Bm2890	W03F11.6n	M51302558
EFV52864	Acey_s0117.g645.t2	Bm7048	Y71G10AR.4	M51311089
EFV52868	Acey_s0477.g2190.t2	Bm12010	M01D7.4a	M51307559
EFV52876	Acey_s0011.g1240.t1	Bm6074	T28F2.5	M51301974
EFV52879	Acey_s0008.g91.t1	Bm1947	C38D4.5	M51314323
EFV52892	Acey_s0120.g896.t2	Bm12140	Y18D10A.8	M51303968
EFV52894	Acey_s0177.g575.t1	Bm2255	C16D9.1	M51301132
EFV52895	Acey_s0003.g1207.t3	Bm4062	K08D10.5	M51302731
EFV52896	Acey_s0141.g2205.t4	Bm5395	ZC518.3b	M51302038
EFV52898	Acey_s0091.g2430.t1	Bm4848	K07A1.7	M51306216
EFV52901	Acey_s0003.g1449.t2	Bm4701	C36B1.3	M51302688
EFV52905	Acey_s0037.g3495.t1	Bm2810i	C47D12.1a	M51310971
EFV52907	Acey_s0348.g3179.t1	Bm8298	F39B2.8	M51310747
EFV52912	Acey_s0069.g360.t2	Bm13662b	F11F1.1b	M51301595
EFV52919	Acey_s0002.g676.t1	Bm2515	C32E8.7	M51301018
EFV52920	Acey_s0042.g633.t1	Bm3516b	F22D6.2	M51306287
EFV52930	Acey_s0067.g88.t1	Bm5985a	C38H2.2	M51301959
EFV52936	Acey_s0051.g2073.t1	Bm4831	R01E6.3b	M51302885
EFV52939	Acey_s0011.g1484.t4	Bm5744	R06B9.1	M51306916
EFV52942	Acey_s0049.g1840.t2	Bm13903	F58F12.1	M51307317
EFV52961	Acey_s0177.g575.t6	Bm6323	T06A4.3b	M51311428
EFV52963	Acey_s0135.g1923.t2	Bm9545	F52B5.1b	M51308109
EFV52975	Acey_s0330.g2682.t2	Bm4785a	VC5.4	M51304092
EFV52984	Acey_s1140.g3677.t1	Bm7249	T16H12.5a	M51300827
EFV52985	Acey_s0014.g2501.t4	Bm3646	F27C1.13	M51300838
EFV52988	Acey_s0041.g491.t1	Bm7784g	F09G8.3	M51308949
EFV53000	Acey_s0019.g3941.t1	Bm4839a	K06A5.7	M51306378
EFV53005	Acey_s0001.g360.t1	Bm4419	F55C7.7b	M51302017
EFV53011	Acey_s0006.g2884.t1	Bm7044	T23D8.1a	M51300447
EFV53012	Acey_s0586.g332.t1	Bm13955c	K07C5.4	M51302175
EFV53014	Acey_s0203.g1857.t3	Bm6811	Y54F10AM.5	M51305443
EFV53017	Acey_s0349.g3190.t4	Bm3808c	F33H2.2	M51305383
EFV53025	Acey_s0035.g2999.t2	Bm4577	F59A3.4	M51301190
EFV53035	Acey_s0041.g348.t1	Bm13854	M01E5.2	M51305244
EFV53038	Acey_s0560.g3465.t4	Bm2856	C50B8.3	M51314076
EFV53039	Acey_s0110.g191.t1	Bm1964	C05C8.9a	M51309534
EFV53046	Acey_s0123.g1173.t1	Bm4495	F56G4.4	M51304114
EFV53071	Acey_s0424.g1220.t3	Bm7664	ZK177.6	M51313868
EFV53075	Acey_s0563.g3516.t2	Bm2824	C47G2.4	M51301207
EFV53090	Acey_s0201.g1749.t5	Bm2801a	C46H11.4f	M51302280
EFV53092	Acey_s0015.g2669.t1	Bm6200a	W05H12.1	M51302279
EFV53093	Acey_s0802.g2423.t2	Bm1734	C06A8.9a	M51300769
EFV53122	Acey_s0622.g759.t3	Bm5103z	M05B5.5a	M51304085
EFV53154	Acey_s0538.g3139.t3	Bm2898	C52E4.6a	M51310655
EFV53158	Acey_s0008.g327.t1	Bm2833	Y48E1B.13a	M51302081
EFV53159	Acey_s0004.g2199.t4	Bm6518	Y41D4B.19b	M51303406
EFV53162	Acey_s0002.g652.t1	Bm5913	T22B11.1	M51303942
EFV53176	Acey_s0034.g2803.t1	Bm14048	ZK616.6b	M51311618
EFV53177	Acey_s0037.g3371.t1	Bm6776	T08D10.1	M51308162
EFV53178	Acey_s0083.g1642.t1	Bm2692	AH6.2	M51308164
EFV53182	Acey_s0304.g1913.t2	Bm3127	F01F1.1c	M51312795
EFV53189	Acey_s0305.g1963.t1	Bm6697	ZC395.6	M51306332
EFV53213	Acey_s0003.g1335.t1	Bm3937	F57F5.4b	M51306355
EFV53246	Acey_s0034.g2878.t2	Bm6192c	F56A12.1	M51306033
EFV53261	Acey_s0016.g3158.t3	Bm4825	T02G5.12	M51309092
EFV53284	Acey_s0277.g1114.t2	Bm5142	M142.8a	M51306981
EFV53312	Acey_s0017.g3301.t4	Bm6815c	Y71G12B.17	M51309525
EFV53314	Acey_s0048.g1561.t3	Bm4273	ZK822.5b	M51310037
EFV53345	Acey_s0012.g1769.t5	Bm2635	C36E8.3	M51313002
EFV53348	Acey_s0003.g1160.t2	Bm10726	F22B3.8	M51300362
EFV53373	Acey_s0053.g2307.t1	Bm6271	W10D5.2	M51300180
EFV53374	Acey_s0197.g1564.t2	Bm7045c	Y71F9B.6d	M51301162
EFV53375	Acey_s0568.g44.t1	Bm12937b	ZK867.1d	M51301910
EFV53377	Acey_s0642.g1036.t1	Bm13693b	Y54H5A.1	M51301390
EFV53385	Acey_s0760.g2123.t4	Bm6159	W03D8.6d	M51302689
EFV53386	Acey_s0230.g2938.t1	Bm14030	H27M09.2	M51300786
EFV53395	Acey_s0189.g1223.t2	Bm14687a	C27H6.4a	M51306896
EFV53400	Acey_s0010.g854.t1	Bm4203	B0416.6	M51307320
EFV53403	Acey_s0080.g1335.t5	Bm9079	Y59A8B.7	M51305868
EFV53432	Acey_s0014.g2499.t1	Bm3929d	F39B2.5	M51302140
EFV53433	Acey_s0043.g794.t2	Bm13831	C42C1.5	M51300512
EFV53446	Acey_s0071.g569.t2	Bm2871	C05C8.3	M51303155
EFV53488	Acey_s0057.g2794.t2	Bm7546	ZK265.9	M51300292
EFV53497	Acey_s0290.g1537.t3	Bm6576	Y45G12B.3	M51307975
EFV53499	Acey_s0197.g1591.t1	Bm3352	Y43C5B.3	M51302274
EFV53510	Acey_s0001.g308.t2	Bm5035	M01D7.2b	M51301981
EFV53511	Acey_s0050.g1900.t2	Bm14062b	T28D9.10b	M51301936
EFV53522	Acey_s0046.g1421.t1	Bm5399	R31.3	M51308751
EFV53526	Acey_s0762.g2140.t2	Bm4105	T22F3.11b	M51300323
EFV53535	Acey_s0324.g2520.t1	Bm3135	F01F1.12a	M51300518
EFV53536	Acey_s0431.g1315.t5	Bm4765a	C37A2.8a	M51310781
EFV53546	Acey_s0197.g1582.t1	Bm5101	M05B5.2	M51304127
EFV53549	Acey_s0026.g1313.t5	Bm4250	Y56A3A.33	M51301841
EFV53550	Acey_s0039.g79.t2	Bm5443s	R166.5a	M51309625
EFV53558	Acey_s0227.g2804.t2	Bm3663b	F28B12.2c	M51302114
EFV53567	Acey_s0013.g2015.t1	Bm5248f	R06C1.2	M51305450
EFV53576	Acey_s0040.g214.t1	Bm4114	F45F2.9b	M51304845
EFV53588	Acey_s0222.g2598.t1	Bm14009	Y54E10A.10	M51302278
EFV53590	Acey_s0142.g2341.t1	Bm3223b	F09E5.3	M51310625
EFV53606	Acey_s0053.g2319.t1	Bm5616	T06D10.1	M51304018
EFV53612	Acey_s0035.g3003.t2	Bm7231a	Y105E8A.3	M51305431
EFV53614	Acey_s0014.g2489.t1	Bm1804	B0432.2	M51307363
EFV53618	Acey_s0077.g1140.t1	Bm6087	VF13D12L.3	M51302580
EFV53622	Acey_s0202.g1784.t1	Bm3271	F10E7.8	M51300464
EFV53631	Acey_s0172.g354.t4	Bm9377b	W02B12.12a	M51305750
EFV53645	Acey_s0052.g2232.t2	Bm7343	Y76B12C.1a	M51302132
EFV53682	Acey_s0010.g1143.t3	Bm8587	F33D11.7	M51311564
EFV53688	Acey_s0462.g1901.t1	Bm11392	Y48G8AL.1d	M51308979
EFV53689	Acey_s0083.g1664.t1	Bm6286	Y6B3B.5a	M51308535
EFV53713	Acey_s0024.g965.t2	Bm1114	C26D10.6a	M51302513
EFV53721	Acey_s0181.g831.t2	Bm2803	C46H11.11	M51302589
EFV53722	Acey_s0058.g2876.t1	Bm4638	H12C20.2a	M51302930
EFV53733	Acey_s0008.g272.t5	Bm13821a	Y41D4A.6c	M51305677
EFV53742	Acey_s0100.g3324.t1	Bm13843	B0303.3	M51302620
EFV53744	Acey_s0108.g22.t6	Bm3093c	T23G11.3	M51307412
EFV53747	Acey_s0117.g669.t1	Bm2921	C54C6.6	M51302078
EFV53759	Acey_s0113.g353.t3	Bm568	F54F2.9	M51312070
EFV53776	Acey_s0260.g513.t1	Bm3357	F13H8.4	M51300445
EFV53778	Acey_s0127.g1374.t1	Bm7012b	Y69A2AR.2a	M51304670
EFV53785	Acey_s0030.g2089.t3	Bm9330	Y43D4A.1	M51305522
EFV53791	Acey_s0006.g2960.t4	Bm6303	Y77E11A.2	M51302700
EFV53794	Acey_s0009.g413.t3	Bm1999	C06A8.1a	M51304859
EFV53805	Acey_s0155.g3069.t1	Bm4956	K09E4.2a	M51308085
EFV53808	Acey_s0128.g1416.t2	Bm14018	M04B2.3	M51305033
EFV53815	Acey_s0444.g1562.t3	Bm6827	Y54G9A.7	M51306243
EFV53818	Acey_s0018.g3618.t1	Bm6981	Y66D12A.9	M51304789
EFV53821	Acey_s0087.g2035.t1	Bm3391g	F15D3.1j	M51301246
EFV53824	Acey_s0161.g3371.t1	Bm3411	F16H11.1	M51307333
EFV53825	Acey_s0397.g707.t1	Bm2627b	C36B1.12a	M51306246
EFV53833	Acey_s0007.g3447.t4	Bm3660	F28B3.4b	M51304808
EFV53843	Acey_s0147.g2596.t4	Bm7527	T07G12.1c	M51304866
EFV53848	Acey_s0728.g1885.t5	Bm3496	C18C4.2	M51300160
EFV53856	Acey_s0545.g3241.t1	Bm5866	T20F5.3	M51305191
EFV53857	Acey_s0203.g1818.t1	Bm6476	T05H10.6b	M51303570
EFV53862	Acey_s0141.g2279.t4	Bm3015b	R07B7.10	M51307587
EFV53874	Acey_s0016.g3059.t1	Bm3340c	ZC302.2a	M51304071
EFV53880	Acey_s0288.g1478.t1	Bm6552d	Y43H11AL.3b	M51310737
EFV53890	Acey_s0062.g3319.t1	Bm12530	Y22D7AR.6	M51302090
EFV53891	Acey_s0023.g670.t3	Bm6617	Y47G6A.7b	M51311434
EFV53906	Acey_s0016.g2921.t2	Bm2592	C34F11.9e	M51309602
EFV53911	Acey_s0170.g285.t2	Bm4334	F54A5.2b	M51312124
EFV53912	Acey_s0232.g3043.t2	Bm9554b	Y48G1A.5a	M51306987
EFV53913	Acey_s0483.g2302.t2	Bm1875b	C01F1.1	M51311257
EFV53917	Acey_s0375.g247.t2	Bm5525	T04A8.4	M51303956
EFV53918	Acey_s0035.g3026.t2	Bm7250	Y105E8B.5	M51303472
EFV53919	Acey_s0882.g2841.t2	Bm2638d	C18A11.7a	M51305920
EFV53920	Acey_s0215.g2364.t2	Bm6398b	Y106G6H.5	M51302769
EFV53931	Acey_s0049.g1764.t1	Bm3736b	B0285.6	M51302699
EFV53939	Acey_s0058.g2858.t2	Bm2395h	C26C6.5b	M51308912
EFV53944	Acey_s0012.g1797.t1	Bm13828a	C44C1.4a	M51309198
EFV53946	Acey_s0011.g1565.t1	Bm8923	Y51H1A.5	M51303350
EFV53947	Acey_s0015.g2537.t1	Bm4521	F57B10.9	M51310764
EFV53953	Acey_s0064.g3545.t4	Bm4973	K10B4.3	M51301213
EFV53956	Acey_s0292.g1595.t1	Bm8011	C07H4.2	M51302540
EFV53958	Acey_s0096.g2923.t3	Bm14040	Y87G2A.10a	M51301442
EFV53959	Acey_s0202.g1789.t1	Bm6902	Y57G7A.10	M51304070
EFV53960	Acey_s0035.g3070.t1	Bm6882	Y56A3A.29a	M51311191
EFV53964	Acey_s0004.g1712.t1	Bm6819	Y54G2A.1	M51302150
EFV53966	Acey_s0015.g2673.t3	Bm7170	ZK792.8	M51304170
EFV53987	Acey_s0217.g2391.t3	Bm7205	T08H4.1b	M51301250
EFV53988	Acey_s0028.g1677.t1	Bm13937a	R05D11.3	M51304708
EFV54004	Acey_s0019.g3832.t1	Bm6536	Y43F4A.1a	M51305394
EFV54008	Acey_s0377.g260.t4	Bm13856	F10G7.8	M51309619
EFV54009	Acey_s0086.g1989.t1	Bm1706b	B0205.11	M51304129
EFV54010	Acey_s0002.g816.t4	Bm9082f	C40H1.1	M51304123
EFV54015	Acey_s0322.g2437.t1	Bm2081	C08H9.2a	M51306923
EFV54033	Acey_s0013.g2080.t1	Bm6235	W08E3.1	M51309703
EFV54039	Acey_s0293.g1622.t4	Bm3719	F31C3.4	M51304079
EFV54042	Acey_s0003.g1248.t3	Bm2158f	C12C8.3a	M51301287
EFV54047	Acey_s0092.g2600.t1	Bm2433	C27D11.1	M51305733
EFV54055	Acey_s0009.g401.t1	Bm4197a	F58H1.1	M51309630
EFV54059	Acey_s0018.g3488.t3	Bm2767c	W01A11.4	M51310303
EFV54072	Acey_s0142.g2293.t3	Bm1992	C05G5.5a	M51307226
EFV54081	Acey_s0002.g936.t2	Bm7166	Y82E9BR.15	M51309219
EFV54094	Acey_s0001.g14.t4	Bm12216	C04G6.3	M51302624
EFV54095	Acey_s0355.g3339.t1	Bm7416	ZK20.3	M51303505
EFV54106	Acey_s0060.g3127.t1	Bm908	B0414.8a	M51300403
EFV54113	Acey_s0012.g1775.t4	Bm4769	E03A3.2	M51307449
EFV54119	Acey_s0362.g3515.t1	Bm13908	F46F11.5	M51304176
EFV54136	Acey_s0536.g3101.t1	Bm2186	C14A4.11	M51310728
EFV54137	Acey_s0064.g3490.t5	Bm1821	F07H5.2	M51310727
EFV54145	Acey_s0107.g3802.t1	Bm5804	D1069.4a	M51304292
EFV54148	Acey_s0175.g484.t2	Bm2593	C34G6.1	M51313667
EFV54149	Acey_s0048.g1707.t1	Bm6641	ZK593.4b	M51311484
EFV54156	Acey_s0066.g3706.t1	Bm6450	Y39A1A.15a	M51301873
EFV54161	Acey_s0028.g1723.t1	Bm6173	W03G11.3	M51302208
EFV54169	Acey_s0049.g1744.t2	Bm3901	F37F2.2	M51310574
EFV54171	Acey_s0011.g1432.t2	Bm2578	C34E10.1	M51301667
EFV54175	Acey_s0077.g1118.t5	Bm5325	R10E4.5a	M51308119
EFV54185	Acey_s0424.g1213.t1	Bm2889	C52A11.3	M51309419
EFV54186	Acey_s0045.g1267.t4	Bm9413	C52A11.4b	M51309397
EFV54188	Acey_s0639.g991.t1	Bm3692	F29C12.3b	M51302008
EFV54191	Acey_s0107.g3789.t2	Bm5613	T06D8.5	M51306424
EFV54201	Acey_s0172.g359.t1	Bm3282c	F10G7.2	M51304860
EFV54218	Acey_s0189.g1219.t1	Bm6787	Y54E5A.7a	M51302596
EFV54221	Acey_s0187.g1129.t1	Bm6961	Y63D3A.6b	M51305226
EFV54236	Acey_s0324.g2515.t1	Bm4376	F54E7.7	M51309569
EFV54240	Acey_s0661.g1275.t1	Bm4185e	F47F6.1b	M51304051
EFV54250	Acey_s0215.g2366.t2	Bm14785	Y23H5A.5d	M51302632
EFV54265	Acey_s0048.g1658.t3	Bm2361	C25A1.13	M51301258
EFV54268	Acey_s0020.g143.t1	Bm7303	Y113G7B.18b	M51306725
EFV54269	Acey_s0020.g86.t4	Bm5853	T19H12.2	M51302652
EFV54270	Acey_s0040.g174.t4	Bm14053	Y108G3AL.7d	M51306808
EFV54296	Acey_s0155.g3068.t4	Bm4006	F32A6.5b	M51313445
EFV54297	Acey_s0031.g2284.t1	Bm14787	Y37E11B.5	M51301021
EFV54300	Acey_s0315.g2258.t1	Bm2559	C34C6.3	M51300425
EFV54302	Acey_s1057.g3510.t4	Bm3848	Y74C9A.3	M51310441
EFV54313	Acey_s0033.g2712.t1	Bm2581	C34E10.5	M51304212
EFV54318	Acey_s0635.g917.t1	Bm14070a	Y38F2AR.9	M51304677
EFV54319	Acey_s0082.g1565.t1	Bm6345	Y25C1A.8a	M51305119
EFV54322	Acey_s0092.g2598.t2	Bm13934a	Y39G8C.1	M51300220
EFV54326	Acey_s0334.g2840.t3	Bm2057	C07H6.4	M51300152
EFV54329	Acey_s0032.g2461.t1	Bm3480	F55C10.1b	M51304581
EFV54343	Acey_s1029.g3436.t2	Bm1738	ZC416.6a	M51305888
EFV54353	Acey_s0064.g3547.t1	Bm6723k	Y56A3A.16a	M51311515
EFV54354	Acey_s0038.g3561.t3	Bm6784	Y54E2A.12a	M51301200
EFV54356	Acey_s0056.g2668.t4	Bm3339	F13D12.2	M51308871
EFV54367	Acey_s0057.g2801.t1	Bm8245	C34G6.4b	M51300054
EFV54370	Acey_s0192.g1357.t1	Bm2372	C01B7.4	M51304208
EFV54372	Acey_s0011.g1318.t1	Bm4814a	K04G2.8a	M51300496
EFV54377	Acey_s0295.g1673.t1	Bm6405	Y37E11B.4	M51310115
EFV54381	Acey_s0252.g204.t3	Bm1668	2RSSE.1b	M51305205
EFV54390	Acey_s0234.g3153.t3	Bm6140	W02D9.1b	M51303824
EFV54391	Acey_s0353.g3296.t1	Bm10221	ZK593.1a	M51305031
EFV54394	Acey_s0093.g2681.t1	Bm5244	R06B9.6	M51302270
EFV54403	Acey_s0041.g464.t3	Bm7469	M05B5.4	M51311615
EFV54411	Acey_s0862.g2742.t1	Bm5340	H04M03.1	M51302015
EFV54416	Acey_s0113.g354.t2	Bm1762	ZK470.5b	M51314115
EFV54418	Acey_s0459.g1835.t1	Bm1836	B0511.1	M51304074
EFV54420	Acey_s0123.g1123.t1	Bm5964	T23G7.4	M51302214
EFV54423	Acey_s0070.g474.t4	Bm4888	K07G5.3	M51302579
EFV54433	Acey_s0053.g2366.t2	Bm3796	F33D11.11	M51308113
EFV54434	Acey_s0105.g3704.t3	Bm6239	W08F4.3	M51304043
EFV54441	Acey_s0323.g2471.t6	Bm3802	F33G12.5	M51302597
EFV54444	Acey_s0222.g2635.t1	Bm7885	F18C12.1	M51308756
EFV54447	Acey_s0119.g859.t3	Bm16933	T19B4.1	M51305879
EFV54449	Acey_s0082.g1551.t1	Bm13915	F40F8.9	M51301860
EFV54453	Acey_s0001.g121.t3	Bm4606	F59F5.6	M51301640
EFV54462	Acey_s0046.g1305.t4	Bm6209	W06D4.4	M51307041
EFV54472	Acey_s0084.g1747.t1	Bm3889a	F37B12.2	M51307292
EFV54473	Acey_s0088.g2178.t1	Bm6936c	Y59C2A.2	M51309555
EFV54482	Acey_s0013.g2070.t1	Bm5976b	T24B1.1	M51304608
EFV54486	Acey_s0299.g1787.t2	Bm3804	F33H1.1e	M51302366
EFV54488	Acey_s0029.g1867.t1	Bm5781b	T13H5.8	M51302627
EFV54496	Acey_s0178.g675.t1	Bm7242	Y105E8A.22	M51302729
EFV54508	Acey_s0037.g3494.t1	Bm2811	C47D12.2	M51302224
EFV54527	Acey_s0011.g1358.t3	Bm2910	K03E5.2a	M51307705
EFV54561	Acey_s0403.g815.t2	Bm2181	C14A4.2	M51302139
EFV54564	Acey_s0289.g1510.t4	Bm13929	C34B2.6	M51311111
EFV54565	Acey_s0029.g1866.t1	Bm2420	C27A7.4	M51309515
EFV54579	Acey_s0190.g1267.t1	Bm3486	M02B1.1b	M51302628
EFV54584	Acey_s0897.g2930.t5	Bm7252c	Y105E8B.8e	M51301183
EFV54599	Acey_s0392.g584.t2	Bm5722	T10H9.4	M51300463
EFV54606	Acey_s0551.g3327.t2	Bm4139d	F46C5.6	M51304665
EFV54607	Acey_s0085.g1820.t1	Bm6311	Y18D10A.3	M51302653
EFV54610	Acey_s0033.g2763.t3	Bm6321a	Y18H1A.3a	M51300979
EFV54611	Acey_s0355.g3316.t1	Bm13764	F43G9.1	M51306268
EFV54618	Acey_s0096.g2882.t2	Bm12882b	T01G9.2a	M51301282
EFV54623	Acey_s0467.g1984.t1	Bm3284	F10G7.4	M51306943
EFV54630	Acey_s0101.g3376.t1	Bm2736	C43H8.1	M51305452
EFV54631	Acey_s0387.g456.t1	Bm4829	K05C4.11	M51304032
EFV54634	Acey_s0302.g1853.t1	Bm2807	C47B2.6b	M51305243
EFV54635	Acey_s0005.g2677.t1	Bm9252	H36L18.1	M51301999
EFV54640	Acey_s0289.g1508.t3	Bm2552	C34B2.8	M51311112
EFV54641	Acey_s0086.g1911.t2	Bm3712	F30F8.10b	M51302218
EFV54646	Acey_s0041.g430.t1	Bm13973	Y71H2AM.6b	M51300908
EFV54647	Acey_s0362.g3502.t1	Bm2912	C53D5.1a	M51309571
EFV54670	Acey_s0118.g786.t3	Bm4683	H28G03.1b	M51304587
EFV54680	Acey_s0102.g3491.t1	Bm5861b	T20D3.5	M51303330
EFV54682	Acey_s0014.g2222.t2	Bm6672a	C26D10.2a	M51302945
EFV54694	Acey_s0078.g1201.t1	Bm2281	C17H12.2	M51310589
EFV54700	Acey_s0150.g2771.t1	Bm4103	F45E4.2	M51308200
EFV54702	Acey_s0322.g2465.t1	Bm3686	F29B9.4c	M51308201
EFV54708	Acey_s0398.g729.t2	Bm4121	T27C4.4a	M51311264
EFV54739	Acey_s0028.g1640.t1	Bm12638	Y23H5A.7c	M51314367
EFV54743	Acey_s0081.g1407.t2	Bm13738	M57.2a	M51310161
EFV54750	Acey_s0390.g535.t1	Bm11572	Y73F8A.5	M51310997
EFV54752	Acey_s0005.g2323.t2	Bm4544	F58B3.4	M51314432
EFV54757	Acey_s0244.g3513.t6	Bm13961f	K08F11.4b	M51305357
EFV54761	Acey_s0068.g252.t5	Bm8701	F08H9.4a	M51311202
EFV54762	Acey_s0067.g89.t1	Bm5837	T19B10.6	M51301306
EFV54770	Acey_s0095.g2828.t2	Bm3198	ZK858.6b	M51304049
EFV54772	Acey_s0024.g973.t1	Bm2876d	C50F4.12	M51302896
EFV54782	Acey_s0303.g1893.t1	Bm3723	F31D4.2	M51303861
EFV54784	Acey_s0131.g1645.t1	Bm15490	R06F6.2	M51311775
EFV54785	Acey_s0268.g779.t1	Bm2426	C27B7.2	M51307497
EFV54786	Acey_s0003.g1160.t3	Bm12873	M01B2.1	M51304640
EFV54790	Acey_s0604.g558.t2	Bm2633b	C36E8.1	M51310351
EFV54794	Acey_s0273.g975.t1	Bm14054b	K12H4.4	M51301510
EFV54801	Acey_s0038.g3577.t1	Bm3194	F08C6.6	M51310999
EFV54802	Acey_s0831.g2583.t1	Bm13979	C37C3.2b	M51306605
EFV54803	Acey_s0013.g1931.t3	Bm6917	Y57G11C.43	M51305390
EFV54806	Acey_s0067.g85.t1	Bm5677	T08G5.5b	M51300752
EFV54807	Acey_s0029.g1986.t1	Bm4702	H43I07.3	M51311882
EFV54808	Acey_s0191.g1329.t1	Bm7238c	Y59E9AL.7	M51304765
EFV54816	Acey_s0067.g71.t3	Bm11298	F38B2.4a	M51309562
EFV54817	Acey_s0153.g2939.t3	Bm3818c	F35A5.8a	M51300278
EFV54821	Acey_s0214.g2338.t1	Bm3921d	F38G1.1	M51305999
EFV54824	Acey_s0230.g2967.t2	Bm6420	Y38C1BA.2a	M51309985
EFV54837	Acey_s0018.g3685.t1	Bm5794	T14G10.1b	M51309725
EFV54842	Acey_s0083.g1635.t5	Bm9831	F48B9.5	M51302692
EFV54844	Acey_s0002.g1101.t4	Bm5998	C23H3.4b	M51308776
EFV54851	Acey_s0117.g683.t5	Bm7590	ZK930.1b	M51310332
EFV54852	Acey_s0032.g2458.t1	Bm2753	R09B5.12	M51310402
EFV54853	Acey_s0466.g1961.t2	Bm9271	F10B5.8	M51307135
EFV54860	Acey_s0349.g3191.t1	Bm3808b	R11E3.6b	M51310112
EFV54863	Acey_s0120.g938.t1	Bm3620	F26E4.9	M51312480
EFV54875	Acey_s0250.g139.t1	Bm6122	F25F2.2a	M51308537
EFV54878	Acey_s0207.g2005.t4	Bm3078a	E01A2.2a	M51306827
EFV54902	Acey_s0004.g2178.t3	Bm7316	Y116A8C.27b	M51305304
EFV54909	Acey_s0293.g1626.t1	Bm2274d	C17G10.4i	M51305307
EFV54917	Acey_s0261.g549.t1	Bm4677b	C01H6.4	M51306857
EFV54922	Acey_s0034.g2870.t2	Bm4394c	F55A4.8d	M51304255
EFV54929	Acey_s0016.g3005.t3	Bm3196e	F08D12.1	M51312371
EFV54939	Acey_s0123.g1170.t1	Bm2185	C14A4.10	M51308973
EFV54945	Acey_s0079.g1301.t1	Bm6849	Y55F3AL.1f	M51303899
EFV54949	Acey_s0077.g1089.t1	Bm8831	F13E6.4	M51307028
EFV54952	Acey_s0371.g113.t4	Bm3331e	F13B10.2d	M51305594
EFV54982	Acey_s1005.g3369.t3	Bm6472	T13G4.2	M51310319
EFV54983	Acey_s0125.g1259.t2	Bm6830a	Y54G11A.8b	M51310320
EFV54985	Acey_s0475.g2136.t1	Bm7526b	ZK669.4	M51310321
EFV54988	Acey_s0156.g3109.t2	Bm14012	C54G4.8	M51302764
EFV54995	Acey_s0124.g1226.t2	Bm2291	C18B2.3	M51308013
EFV55010	Acey_s0016.g3037.t3	Bm9416	K10B3.6a	M51303854
EFV55016	Acey_s0046.g1371.t3	Bm6327	Y55F3AR.3b	M51303911
EFV55027	Acey_s0036.g3355.t1	Bm4503b	F57A8.2a	M51310360
EFV55030	Acey_s0654.g1187.t2	Bm9520	C30G4.4q	M51300479
EFV55043	Acey_s0026.g1462.t2	Bm7568	ZK856.13	M51303575
EFV55048	Acey_s0636.g928.t3	Bm7370	ZC328.3b	M51306541
EFV55058	Acey_s0016.g3129.t1	Bm4157	C05B5.11	M51304157
EFV55063	Acey_s0002.g658.t2	Bm3645	F27C1.6	M51308557
EFV55068	Acey_s0240.g3337.t1	Bm4147	F46E10.10a	M51308208
EFV55070	Acey_s0033.g2643.t2	Bm11329	F47A4.1a	M51310130
EFV55071	Acey_s0040.g326.t2	Bm2646	C37C3.8b	M51308212
EFV55072	Acey_s0031.g2289.t4	Bm6141	Y60A3A.19c	M51302951
EFV55075	Acey_s0813.g2475.t1	Bm10227	Y77E11A.1a	M51305434
EFV55076	Acey_s0031.g2258.t1	Bm7208	Y97E10AL.3	M51307433
EFV55077	Acey_s0002.g884.t2	Bm2765	F31D4.7	M51302743
EFV55090	Acey_s0125.g1262.t1	Bm7562	K01A6.2b	M51306822
EFV55099	Acey_s0084.g1713.t1	Bm7025	F47E1.2	M51306823
EFV55144	Acey_s0115.g528.t1	Bm4136d	ZC581.1	M51306120
EFV55145	Acey_s0569.g70.t1	Bm5858	T20B12.7	M51300349
EFV55146	Acey_s0002.g701.t2	Bm6971	Y65B4A.3	M51303882
EFV55147	Acey_s0061.g3215.t2	Bm5014a	K11H12.8c	M51303881
EFV55150	Acey_s0121.g1024.t1	Bm2783	W07G4.3	M51304496
EFV55151	Acey_s0494.g2461.t3	Bm4320	F53G2.7	M51310496
EFV55171	Acey_s0240.g3345.t2	Bm6706	Y50D4C.4b	M51309797
EFV55172	Acey_s0155.g3043.t2	Bm5186a	ZK185.5	M51303574
EFV55174	Acey_s0520.g2850.t2	Bm3969	F40F9.2	M51309796
EFV55175	Acey_s0010.g1134.t1	Bm9412	R05H5.4	M51309663
EFV55185	Acey_s0002.g991.t1	Bm5782	T14A8.1	M51300108
EFV55194	Acey_s0054.g2523.t1	Bm14814	T06E6.1	M51310293
EFV55196	Acey_s0065.g3648.t1	Bm2069	C08B11.7	M51300059
EFV55197	Acey_s0022.g603.t1	Bm2402	C26E6.3	M51302556
EFV55198	Acey_s0581.g269.t3	Bm2878	C50F4.14b	M51310458
EFV55199	Acey_s0002.g1111.t3	Bm6355	Y32H12A.4	M51310457
EFV55200	Acey_s0215.g2355.t1	Bm2354	C25A1.3	M51307131
EFV55204	Acey_s0232.g3062.t1	Bm12981d	C27A2.2a	M51304560
EFV55210	Acey_s0049.g1787.t2	Bm2964	JC8.14	M51303125
EFV55214	Acey_s0286.g1419.t1	Bm4983b	Y50D4C.1a	M51306718
EFV55221	Acey_s0036.g3220.t1	Bm2510	F29B9.5	M51304558
EFV55223	Acey_s0001.g92.t1	Bm5306	R08D7.6b	M51302565
EFV55227	Acey_s0081.g1413.t2	Bm5730	T11G6.8a	M51304718
EFV55228	Acey_s0315.g2274.t1	Bm2104	DH11.1	M51306271
EFV55230	Acey_s0062.g3327.t1	Bm11648a	R08A2.2	M51310118
EFV55231	Acey_s0293.g1627.t3	Bm5740	T12B3.4a	M51308424
EFV55232	Acey_s0450.g1677.t1	Bm5344	C45B11.6	M51307709
EFV55240	Acey_s0008.g268.t2	Bm5537	Y37A1C.1h	M51308774
EFV55241	Acey_s0099.g3219.t1	Bm13993	F07A11.5	M51300242
EFV55242	Acey_s0405.g867.t4	Bm2061	C08B6.7a	M51303866
EFV55275	Acey_s0515.g2788.t4	Bm3819a	F35B3.5c	M51303269
EFV55276	Acey_s0274.g1016.t1	Bm1676	B0001.1b	M51308529
EFV55280	Acey_s0612.g663.t1	Bm2363e	C25A11.4e	M51303329
EFV55284	Acey_s0081.g1490.t2	Bm3771	Y43F8A.3b	M51309777
EFV55296	Acey_s0162.g3433.t3	Bm12929	T05F1.3	M51307640
EFV55297	Acey_s0049.g1878.t1	Bm5593	F12F6.3a	M51304326
EFV55326	Acey_s0084.g1776.t4	Bm2128	C10C5.6e	M51313608
EFV55327	Acey_s0202.g1785.t2	Bm4204	T02G5.13b	M51308523
EFV55328	Acey_s0125.g1260.t1	Bm6831	Y54G11A.9	M51306002
EFV55329	Acey_s0122.g1066.t2	Bm6549c	Y43F8C.8	M51305994
EFV55335	Acey_s0303.g1878.t5	Bm2175	C13F10.4	M51310298
EFV55337	Acey_s0024.g985.t1	Bm3737	F32A5.1b	M51313671
EFV55338	Acey_s0028.g1673.t2	Bm5222	R05D11.5	M51301883
EFV55339	Acey_s0051.g2164.t1	Bm13943	F32E10.1	M51301882
EFV55340	Acey_s0815.g2495.t3	Bm4230	F49E8.4	M51300325
EFV55343	Acey_s0277.g1131.t1	Bm13909	Y49E10.15	M51314025
EFV55344	Acey_s0466.g1957.t2	Bm4705	JC8.4	M51308996
EFV55345	Acey_s0043.g792.t3	Bm7560	ZK829.7	M51308999
EFV55352	Acey_s0050.g1953.t3	Bm6468	Y39B6A.35	M51310602
EFV55357	Acey_s0137.g2042.t1	Bm3316a	F42G8.6	M51309925
EFV55358	Acey_s0058.g2903.t2	Bm2676	C39F7.5	M51308222
EFV55360	Acey_s0044.g1034.t3	Bm8325b	F33E11.6c	M51309222
EFV55361	Acey_s0143.g2360.t3	Bm5711	T10E9.7b	M51309224
EFV55362	Acey_s0041.g489.t1	Bm3623	F26F2.7	M51309225
EFV55363	Acey_s0201.g1734.t1	Bm2138	C10F3.6	M51309221
EFV55364	Acey_s0049.g1870.t1	Bm3421f	F17C11.9b	M51309220
EFV55365	Acey_s0010.g1144.t1	Bm5644	T07C12.9	M51311722
EFV55375	Acey_s0042.g690.t2	Bm4285	F53A10.2c	M51301090
EFV55402	Acey_s0491.g2402.t1	Bm4226	F49E7.1b	M51313607
EFV55427	Acey_s0183.g910.t2	Bm5825a	T19A5.1	M51307994
EFV55432	Acey_s0750.g2042.t3	Bm1946	R06B9.4	M51308000
EFV55434	Acey_s0117.g677.t2	Bm13671	C02F5.9	M51312896
EFV55435	Acey_s0011.g1443.t4	Bm16930	T14B4.2	M51301267
EFV55440	Acey_s0132.g1681.t1	Bm4352	Y73B6BL.38	M51312470
EFV55447	Acey_s0345.g3096.t3	Bm6309	Y17G9B.5	M51305350
EFV55454	Acey_s0394.g620.t1	Bm3532a	F23B2.4	M51306840
EFV55455	Acey_s0042.g677.t1	Bm519	F32A11.7	M51306846
EFV55459	Acey_s0010.g913.t1	Bm5925b	T22D1.4	M51300266
EFV55460	Acey_s1002.g3354.t1	Bm13981a	Y116A8A.9c	M51300267
EFV55464	Acey_s0021.g371.t1	Bm5987d	T24D11.1f	M51304228
EFV55474	Acey_s0032.g2453.t2	Bm13789	F55A12.7	M51302207
EFV55476	Acey_s0124.g1219.t1	Bm13792	W03A3.2	M51302942
EFV55486	Acey_s0202.g1786.t1	Bm4868	C07H6.1	M51314205
EFV55488	Acey_s0192.g1348.t2	Bm2164	C12D12.5	M51306027
EFV55493	Acey_s0853.g2689.t1	Bm3420	F17C11.8	M51304275
EFV55496	Acey_s0170.g236.t1	Bm3938	F39C12.3b	M51311346
EFV55506	Acey_s0115.g525.t3	Bm2225	C15H9.5	M51311766
EFV55514	Acey_s0593.g412.t1	Bm7500	Y57G11C.24e	M51304499
EFV55515	Acey_s0013.g2191.t1	Bm6912	Y57G11C.24a	M51304722
EFV55517	Acey_s0004.g1970.t1	Bm3041	D2024.6	M51304719
EFV55521	Acey_s0307.g2040.t5	Bm9174	Y39E4B.9c	M51303918
EFV55525	Acey_s0149.g2711.t1	Bm4318	F53G2.4b	M51311883
EFV55539	Acey_s0664.g1317.t1	Bm14816	D1054.13a	M51305345
EFV55544	Acey_s0094.g2737.t1	Bm12745	F52D10.2	M51303904
EFV55552	Acey_s0531.g3018.t1	Bm13873	C03C10.3	M51307707
EFV55553	Acey_s0008.g63.t1	Bm2589	C09D8.1a	M51307706
EFV55563	Acey_s0116.g618.t1	Bm2969	C56C10.1	M51310063
EFV55564	Acey_s0309.g2080.t1	Bm2799	C46G7.4l	M51310148
EFV55580	Acey_s0047.g1471.t1	Bm4473	ZC404.8	M51311558
EFV55581	Acey_s0654.g1191.t4	Bm3594f	C02B4.1	M51303475
EFV55586	Acey_s1038.g3468.t2	Bm14050	ZK1098.5	M51301756
EFV55594	Acey_s0499.g2563.t1	Bm1697	B0035.16	M51308543
EFV55601	Acey_s0065.g3593.t1	Bm417	F09E5.17	M51305379
EFV55607	Acey_s0411.g962.t1	Bm3840	F35F11.1	M51303830
EFV55608	Acey_s0082.g1549.t4	Bm4880c	K07E8.7	M51306708
EFV55609	Acey_s0829.g2566.t1	Bm2551	F30H5.1	M51311269
EFV55613	Acey_s0360.g3433.t2	Bm556	Y76B12C.2	M51304768
EFV55615	Acey_s0432.g1361.t1	Bm3056a	C34C6.2a	M51308971
EFV55621	Acey_s0121.g1007.t2	Bm4435	C17E4.9	M51309211
EFV55622	Acey_s0148.g2666.t1	Bm13987	F28A10.10	M51309213
EFV55624	Acey_s0018.g3482.t1	Bm7828	C43C3.2c	M51301780
EFV55625	Acey_s0186.g1073.t1	Bm1855	BE0003N10.1	M51306825
EFV55626	Acey_s0013.g1999.t1	Bm1953	C04F12.4	M51309084
EFV55632	Acey_s0023.g715.t1	Bm6112	W02A2.3a	M51307092
EFV55633	Acey_s0110.g188.t2	Bm1963	ZK632.4	M51307495
EFV55636	Acey_s0002.g508.t1	Bm5712e	C54D2.1	M51306403
EFV55645	Acey_s1076.g3552.t2	Bm12273	Y102A5A.1	M51311953
EFV55653	Acey_s0078.g1189.t3	Bm11980	Y87G2A.5	M51304635
EFV55654	Acey_s0078.g1219.t3	Bm4423	F55C12.5b	M51313052
EFV55660	Acey_s0042.g686.t1	Bm4470	F56D1.3	M51312292
EFV55661	Acey_s0438.g1480.t2	Bm4328c	F53H8.2	M51312291
EFV55663	Acey_s0121.g1010.t3	Bm6571b	T04D1.3d	M51304869
EFV55675	Acey_s0343.g3059.t1	Bm5131b	M106.4b	M51312399
EFV55686	Acey_s0113.g402.t3	Bm6244	Y37E11AL.8	M51306508
EFV55688	Acey_s0533.g3052.t1	Bm13735e	Y59A8B.6	M51306805
EFV55707	Acey_s0052.g2248.t1	Bm12922	B0041.7	M51300421
EFV55711	Acey_s0060.g3124.t1	Bm13971b	C04F12.10	M51314157
EFV55721	Acey_s0003.g1414.t1	Bm6773	Y53G8B.2	M51308738
EFV55726	Acey_s0108.g53.t1	Bm3234	F09F7.1	M51308420
EFV55732	Acey_s0091.g2448.t2	Bm13840	K02F2.2	M51301073
EFV55734	Acey_s0051.g2101.t1	Bm12587	T10B10.7	M51302932
EFV55764	Acey_s0179.g714.t3	Bm3975	F40F12.5a	M51308464
EFV55768	Acey_s0175.g488.t1	Bm13959	T25G3.3	M51307330
EFV55771	Acey_s0134.g1829.t3	Bm5757	Y39E4B.9d	M51307570
EFV55778	Acey_s0100.g3294.t2	Bm4237	ZC239.15	M51306028
EFV55780	Acey_s0119.g876.t1	Bm5931c	T22F3.3b	M51310296
EFV55793	Acey_s0154.g2979.t4	Bm5045	M01E11.2	M51305804
EFV55804	Acey_s0227.g2815.t2	Bm5270	F11A3.1	M51309892
EFV55806	Acey_s0122.g1051.t1	Bm2352	M153.1	M51310951
EFV55811	Acey_s0197.g1595.t4	Bm5664	F36H2.3a	M51303325
EFV55839	Acey_s0371.g116.t2	Bm9909b	F18H3.3b	M51300721
EFV55841	Acey_s0322.g2454.t3	Bm5862	F11A10.4b	M51309095
EFV55842	Acey_s0018.g3639.t1	Bm1967	F54D1.5	M51309094
EFV55856	Acey_s0006.g2860.t2	Bm4949	K09C4.8	M51313593
EFV55866	Acey_s0101.g3396.t4	Bm5863	T20D3.8	M51310308
EFV55867	Acey_s0033.g2626.t4	Bm4691	H37A05.1	M51305162
EFV55869	Acey_s0337.g2913.t2	Bm3233	F09E10.8a	M51310480
EFV55872	Acey_s0001.g339.t7	Bm7027	T05H10.1	M51308517
EFV55879	Acey_s0337.g2911.t1	Bm3232	F09E10.7a	M51307488
EFV55888	Acey_s0033.g2645.t1	Bm2661	C38C10.5a	M51309086
EFV55895	Acey_s0287.g1452.t1	Bm5400	R53.1b	M51301720
EFV55906	Acey_s0503.g2634.t3	Bm3789	F33D4.4	M51304369
EFV55907	Acey_s0363.g3532.t1	Bm3004f	D1014.3	M51308378
EFV55911	Acey_s0353.g3290.t1	Bm2518	C32E8.11	M51306709
EFV55914	Acey_s0455.g1747.t1	Bm6533	Y43B11AR.4	M51308229
EFV55921	Acey_s0574.g179.t2	Bm7586	T19A5.2h	M51304965
EFV55934	Acey_s0097.g3039.t1	Bm2991	CD4.2	M51307581
EFV55935	Acey_s0567.g32.t1	Bm7497b	ZK550.4	M51300147
EFV55937	Acey_s0091.g2434.t2	Bm7618	W02D3.11a	M51301296
EFV55945	Acey_s0689.g1561.t1	Bm4104b	C08G5.4a	M51305402
EFV55946	Acey_s0043.g723.t4	Bm4067a	F43G9.5	M51308036
EFV55949	Acey_s0946.g3160.t2	Bm5993b	T24H10.1	M51301870
EFV55951	Acey_s0159.g3279.t1	Bm6126	F20D1.9	M51303646
EFV55953	Acey_s0022.g605.t1	Bm2404	C26E6.5	M51304150
EFV55961	Acey_s0082.g1566.t1	Bm13803a	Y25C1A.5	M51305996
EFV55962	Acey_s0725.g1858.t1	Bm4802	K04E7.1	M51312810
EFV55989	Acey_s0059.g2955.t1	Bm3945	F39H2.5	M51314049
EFV55995	Acey_s0085.g1854.t4	Bm13817	T07A9.2	M51304715
EFV55997	Acey_s0016.g3143.t3	Bm5847b	T19D7.4	M51304711
EFV56008	Acey_s0744.g1997.t2	Bm2179a	W08G11.4	M51300078
EFV56014	Acey_s0016.g3031.t1	Bm10243	Y11D7A.14	M51305674
EFV56044	Acey_s0003.g1224.t1	Bm3027e	F15B10.2a	M51307877
EFV56049	Acey_s0550.g3307.t1	Bm4884	K07F5.13c	M51307766
EFV56061	Acey_s0099.g3169.t1	Bm8640	T28D9.3d	M51303515
EFV56063	Acey_s0093.g2644.t2	Bm10949	K09F5.6	M51312187
EFV56073	Acey_s0005.g2669.t3	Bm14072a	Y111B2A.13	M51307123
EFV56074	Acey_s0290.g1555.t2	Bm3300d	T12D8.2	M51303059
EFV56075	Acey_s0159.g3310.t4	Bm12740	Y42G9A.6b	M51307396
EFV56076	Acey_s0090.g2362.t2	Bm11317	ZK637.2	M51306352
EFV56082	Acey_s0032.g2451.t1	Bm1818	B0464.7	M51302868
EFV56084	Acey_s0496.g2484.t2	Bm8337	Y37B11A.2b	M51305070
EFV56086	Acey_s0207.g2016.t3	Bm6214a	W06E11.5b	M51301388
EFV56098	Acey_s0037.g3433.t1	Bm5342	R11A8.2	M51309154
EFV56101	Acey_s0019.g3888.t4	Bm7060	D1037.2	M51300395
EFV56108	Acey_s0113.g351.t1	Bm4378	F54G8.3	M51303153
EFV56114	Acey_s0368.g65.t1	Bm3767	F32D8.13a	M51312302
EFV56115	Acey_s0006.g3075.t1	Bm4342	F54C1.5a	M51305864
EFV56116	Acey_s0011.g1445.t1	Bm5080	M03C11.4	M51308098
EFV56118	Acey_s0432.g1356.t2	Bm4425a	F52B5.6	M51313738
EFV56123	Acey_s0019.g3851.t1	Bm2687	F39B2.3	M51306405
EFV56124	Acey_s0210.g2141.t2	Bm3778	F32H2.5	M51306404
EFV56134	Acey_s0014.g2437.t1	Bm2436	C27F2.8	M51313126
EFV56152	Acey_s0017.g3338.t1	Bm13837	H28O16.1c	M51306218
EFV56156	Acey_s0037.g3368.t2	Bm4284b	C14F5.3d	M51309759
EFV56175	Acey_s0019.g3857.t1	Bm11158c	Y54G9A.6	M51311791
EFV56183	Acey_s0009.g782.t1	Bm1492b	Y105E8A.2	M51303056
EFV56185	Acey_s0004.g2069.t1	Bm8004	C25F9.5	M51300427
EFV56187	Acey_s1093.g3592.t1	Bm4151	F46F6.1a	M51303620
EFV56197	Acey_s0011.g1555.t2	Bm2398a	F47B10.7	M51310248
EFV56205	Acey_s0031.g2418.t1	Bm10121	C01H6.9	M51300191
EFV56216	Acey_s0103.g3548.t5	Bm3871	F36F2.3b	M51302648
EFV56219	Acey_s0068.g207.t1	Bm3534	F23B2.13b	M51303607
EFV56229	Acey_s0069.g352.t3	Bm4910	F07E5.5	M51309177
EFV56231	Acey_s0700.g1638.t1	Bm3950	F39H12.3	M51301347
EFV56237	Acey_s0711.g1738.t3	Bm3355	F13H6.5	M51308267
EFV56247	Acey_s0024.g932.t1	Bm7243	Y105E8A.23a	M51308785
EFV56264	Acey_s0282.g1279.t6	Bm2883	Y64G10A.7e	M51300288
EFV56274	Acey_s0073.g726.t1	Bm5239	C53D5.6	M51306911
EFV56276	Acey_s0092.g2595.t1	Bm4491c	F56F4.5	M51303410
EFV56277	Acey_s0008.g262.t1	Bm3984	Y73B6BL.6b	M51311365
EFV56287	Acey_s0310.g2092.t1	Bm2668	C39B5.6	M51304929
EFV56290	Acey_s0064.g3548.t1	Bm6940	W02D7.7	M51311208
EFV56292	Acey_s0002.g546.t1	Bm4292b	F53B3.5	M51304923
EFV56306	Acey_s0007.g3188.t3	Bm14115	T05H4.3	M51300064
EFV56307	Acey_s0115.g520.t4	Bm2226	C15H9.7	M51301359
EFV56314	Acey_s0037.g3477.t2	Bm3601	F26A1.14	M51302977
EFV56324	Acey_s0132.g1737.t1	Bm3301	F11A10.8	M51303530
EFV56325	Acey_s0003.g1685.t1	Bm2777	C45G3.1	M51305626
EFV56335	Acey_s0202.g1770.t3	Bm11295	K08F8.6	M51303430
EFV56341	Acey_s0066.g3735.t1	Bm3902	F21D5.7	M51301839
EFV56346	Acey_s0032.g2578.t1	Bm7629	C12C8.2a	M51300895
EFV56356	Acey_s0011.g1375.t3	Bm13784	Y108F1.5	M51311611
EFV56367	Acey_s0197.g1593.t1	Bm3353	F20H11.3	M51302872
EFV56368	Acey_s0371.g139.t2	Bm4049	M88.5c	M51300209
EFV56372	Acey_s0002.g863.t3	Bm5201	F53A2.6b	M51309206
EFV56377	Acey_s0138.g2074.t2	Bm7342	ZC247.3	M51306107
EFV56401	Acey_s0003.g1288.t1	Bm11983	T25D3.2	M51306604
EFV56405	Acey_s0578.g232.t1	Bm1921	T28B4.1b	M51304946
EFV56407	Acey_s0587.g338.t1	Bm8352	K02B2.5	M51303426
EFV56408	Acey_s0161.g3380.t1	Bm2154c	C11G6.1a	M51303436
EFV56413	Acey_s0480.g2230.t1	Bm7386	W01C8.6a	M51301520
EFV56414	Acey_s0001.g250.t1	Bm14064	ZK970.4	M51306084
EFV56432	Acey_s0031.g2393.t2	Bm1749	B0303.15	M51311425
EFV56439	Acey_s0018.g3591.t1	Bm3017	B0524.2	M51304309
EFV56450	Acey_s0126.g1357.t1	Bm10979	C38D4.8	M51308540
EFV56454	Acey_s0746.g2017.t1	Bm3215	F09B12.1a	M51306970
EFV56461	Acey_s0007.g3297.t3	Bm6758	Y53F4B.15	M51312629
EFV56469	Acey_s0005.g2725.t1	Bm5280	R07E5.3	M51305664
EFV56471	Acey_s0115.g490.t1	Bm4265	F52E4.7	M51305665
EFV56473	Acey_s0020.g229.t3	Bm13775c	B0361.10	M51305017
EFV56475	Acey_s0015.g2816.t2	Bm4166	F44G3.2	M51308829
EFV56478	Acey_s0148.g2633.t1	Bm6104	H06A10.1	M51308172
EFV56484	Acey_s0055.g2572.t1	Bm1815	B0464.4a	M51307902
EFV56485	Acey_s1076.g3551.t3	Bm13944d	W06H3.3	M51303135
EFV56492	Acey_s0120.g893.t1	Bm7622	ZK1098.7	M51311379
EFV56499	Acey_s0159.g3309.t1	Bm5534	T04A8.14	M51311992
EFV56500	Acey_s0078.g1160.t2	Bm16891	F52B11.1a	M51310982
EFV56504	Acey_s0062.g3322.t1	Bm13974	F12F6.7	M51307726
EFV56515	Acey_s0002.g657.t1	Bm14058b	C06A1.5	M51303192
EFV56516	Acey_s0305.g1959.t2	Bm7280	Y110A7A.10	M51307060
EFV56520	Acey_s0082.g1579.t1	Bm2163	T22E5.2	M51303618
EFV56526	Acey_s0023.g816.t1	Bm4534e	F58A3.1a	M51303421
EFV56529	Acey_s0190.g1232.t1	Bm3462	F20D1.2	M51303676
EFV56531	Acey_s0005.g2744.t1	Bm5497a	F14D12.6a	M51303596
EFV56540	Acey_s0640.g997.t1	Bm3283	C03D6.5	M51307296
EFV56545	Acey_s0069.g319.t1	Bm2866b	C50D2.9	M51303187
EFV56570	Acey_s0054.g2531.t1	Bm12148	ZC376.5	M51307158
EFV56571	Acey_s0134.g1872.t1	Bm4617	H03A11.1	M51307160
EFV56573	Acey_s0059.g2981.t1	Bm14772	Y71H2AM.17	M51301170
EFV56578	Acey_s0338.g2936.t1	Bm3952b	Y69E1A.5	M51302033
EFV56588	Acey_s0038.g3612.t2	Bm6529c	F57B10.3a	M51308322
EFV56601	Acey_s0001.g65.t1	Bm13982	F44G4.1	M51303136
EFV56604	Acey_s0023.g824.t1	Bm2449	B0285.9	M51300711
EFV56613	Acey_s0001.g476.t1	Bm6813	Y37D8A.2	M51301416
EFV56619	Acey_s0108.g9.t2	Bm5844	Y54F10BM.1	M51306126
EFV56639	Acey_s0096.g2877.t2	Bm14077	Y71G12B.14	M51303257
EFV56656	Acey_s0066.g3758.t2	Bm2192	C09G5.2a	M51301379
EFV56674	Acey_s0423.g1202.t2	Bm1740	B0286.3	M51304951
EFV56675	Acey_s0087.g2110.t1	Bm5009	B0432.4	M51302974
EFV56678	Acey_s0066.g3767.t2	Bm2508d	C32D5.3	M51301639
EFV56679	Acey_s0101.g3329.t4	Bm2584	C34E11.1	M51307909
EFV56681	Acey_s0006.g2962.t1	Bm3773	F32G8.4	M51303538
EFV56685	Acey_s0030.g2068.t1	Bm6783	Y54E2A.11a	M51310367
EFV56688	Acey_s0395.g641.t3	Bm5792	T14F9.3	M51304493
EFV56694	Acey_s0206.g1970.t1	Bm13949	R13A5.12	M51303088
EFV56698	Acey_s0009.g669.t4	Bm4120	R74.7	M51306353
EFV56706	Acey_s0196.g1537.t1	Bm5237	R03G5.5a	M51304264
EFV56710	Acey_s0364.g3570.t3	Bm3320e	F12D9.1a	M51301444
EFV56726	Acey_s0009.g805.t1	Bm13783	F36A2.6	M51312531
EFV56732	Acey_s0074.g878.t4	Bm16938	C29H12.2	M51300571
EFV56739	Acey_s0015.g2620.t4	Bm3731	F31E3.4	M51303720
EFV56743	Acey_s0292.g1597.t1	Bm11156	Y45F10D.3c	M51302198
EFV56745	Acey_s0093.g2630.t1	Bm3959	F40E10.3	M51306089
EFV56746	Acey_s0251.g191.t3	Bm3842a	F35G2.2	M51309707
EFV56757	Acey_s0109.g119.t2	Bm3429	F18A1.6b	M51303021
EFV56767	Acey_s0008.g153.t1	Bm3050	D2045.9	M51303025
EFV56779	Acey_s0898.g2937.t3	Bm1813	B0464.2a	M51300318
EFV56787	Acey_s0161.g3379.t1	Bm2713b	C42D8.8a	M51300533
EFV56788	Acey_s0161.g3367.t1	Bm5261	Y65B4BR.9	M51302629
EFV56795	Acey_s0400.g758.t2	Bm3481c	F21A10.2a	M51300539
EFV56796	Acey_s0009.g752.t4	Bm13898	Y37E3.8a	M51301591
EFV56797	Acey_s0018.g3698.t1	Bm1728	B0261.4a	M51308294
EFV56813	Acey_s0900.g2949.t1	Bm2619	C35D10.10	M51305646
EFV56826	Acey_s0496.g2478.t3	Bm2827	F26F4.3	M51311656
EFV56833	Acey_s0228.g2851.t6	Bm5751b	C02C6.1a	M51303822
EFV56837	Acey_s0121.g959.t3	Bm6742f	F35C8.3	M51300801
EFV56841	Acey_s0191.g1323.t3	Bm4645a	H14A12.3	M51301697
EFV56842	Acey_s0421.g1158.t1	Bm6621	Y47G6A.12	M51301696
EFV56847	Acey_s0020.g17.t3	Bm4676	H24K24.4d	M51311423
EFV56850	Acey_s0016.g3014.t1	Bm10419	Y65B4BR.3	M51302913
EFV56856	Acey_s0541.g3179.t1	Bm4090	F44E7.9	M51305571
EFV56859	Acey_s0050.g1936.t2	Bm5619a	F08F1.9	M51302777
EFV56867	Acey_s0316.g2291.t1	Bm6384	Y37D8A.15	M51305839
EFV56870	Acey_s0361.g3463.t4	Bm7507	ZK632.7	M51307562
EFV56871	Acey_s0091.g2475.t1	Bm4646	T07C4.2	M51301439
EFV56878	Acey_s0005.g2434.t3	Bm13956a	Y110A7A.8	M51300446
EFV56879	Acey_s0023.g665.t1	Bm10013b	T13H2.5a	M51309895
EFV56884	Acey_s0008.g380.t1	Bm6278	F07C6.1a	M51300767
EFV56885	Acey_s0045.g1225.t1	Bm5415	K12C11.1b	M51303558
EFV56887	Acey_s0017.g3457.t1	Bm6608	Y47D3B.4	M51301410
EFV56890	Acey_s0070.g432.t2	Bm5437	R153.1d	M51305286
EFV56896	Acey_s0320.g2397.t1	Bm5409	R74.3c	M51303667
EFV56905	Acey_s0002.g710.t1	Bm14074	W01D2.1	M51300198
EFV56908	Acey_s0096.g2928.t2	Bm3669	F28C6.4a	M51300936
EFV56912	Acey_s0011.g1288.t1	Bm1920	C02F5.4	M51309567
EFV56915	Acey_s0103.g3547.t6	Bm6733	Y51H7C.6c	M51303559
EFV56925	Acey_s0059.g2984.t1	Bm8413	T23G7.1	M51310561
EFV56926	Acey_s0020.g215.t1	Bm8648	M18.2	M51306844
EFV56928	Acey_s0576.g208.t1	Bm6810c	C17H12.9	M51306870
EFV56939	Acey_s0194.g1444.t3	Bm4596b	F58G11.6	M51309197
EFV56946	Acey_s0185.g1024.t2	Bm6183	W04G3.1a	M51306115
EFV56948	Acey_s0360.g3457.t1	Bm6187	W04G3.2	M51300579
EFV56960	Acey_s0331.g2726.t3	Bm3042c	ZC410.3a	M51306876
EFV56961	Acey_s0074.g841.t1	Bm4734	K01G5.8b	M51312525
EFV56969	Acey_s0065.g3590.t1	Bm14032	T27F7.1	M51306162
EFV56974	Acey_s0165.g53.t3	Bm7329c	ZK328.2	M51309645
EFV57001	Acey_s0011.g1359.t3	Bm3219	C52E4.7	M51303120
EFV57003	Acey_s0038.g3607.t4	Bm13844	F25B4.6	M51309152
EFV57004	Acey_s0124.g1207.t1	Bm6642c	Y48B6A.12	M51303287
EFV57007	Acey_s0999.g3344.t2	Bm13739a	T05H4.5	M51302928
EFV57011	Acey_s0016.g3152.t3	Bm9307	M6.1b	M51303707
EFV57033	Acey_s0005.g2728.t1	Bm2614	C35D10.1	M51308300
EFV57040	Acey_s0121.g970.t1	Bm8749	F16H11.3	M51301438
EFV57044	Acey_s0060.g3128.t1	Bm2523e	C32F10.2	M51300310
EFV57050	Acey_s0099.g3195.t1	Bm13966c	T22D1.10	M51305036
EFV57052	Acey_s0122.g1056.t3	Bm6230m	W07G4.4	M51308539
EFV57053	Acey_s0022.g473.t1	Bm5596	T05G5.10a	M51300778
EFV57056	Acey_s0476.g2144.t1	Bm3930	F39B2.6	M51300779
EFV57057	Acey_s0024.g1001.t4	Bm5518	C34C12.6	M51304633
EFV57060	Acey_s0132.g1691.t4	Bm6039	T27B1.1	M51312468
EFV57061	Acey_s1127.g3651.t1	Bm6378a	Y37D8A.1	M51312467
EFV57071	Acey_s0564.g3536.t1	Bm4040	F42H10.3a	M51306283
EFV57072	Acey_s0454.g1740.t1	Bm1840	B0511.8	M51306938
EFV57079	Acey_s0124.g1188.t1	Bm4276	R12E2.1	M51308516
EFV57080	Acey_s0285.g1367.t5	Bm4632b	F18A11.2	M51300574
EFV57091	Acey_s0103.g3531.t1	Bm7427d	ZK121.2	M51304967
EFV57105	Acey_s0357.g3378.t1	Bm9530	Y51A2D.5	M51301684
EFV57109	Acey_s0997.g3340.t1	Bm2526	C33A11.1	M51305672
EFV57129	Acey_s0040.g205.t1	Bm6785	Y54E5A.5	M51301605
EFV57131	Acey_s0121.g974.t1	Bm2800c	C46H3.2a	M51305016
EFV57137	Acey_s0022.g587.t1	Bm4513	F57B9.5	M51305678
EFV57160	Acey_s0368.g53.t1	Bm10794	F46B6.6a	M51313832
EFV57164	Acey_s0141.g2271.t1	Bm3567d	F25B5.7b	M51311704
EFV57182	Acey_s0003.g1341.t1	Bm14057	C07A9.2	M51301419
EFV57193	Acey_s0009.g751.t1	Bm13905	Y37E3.7	M51302694
EFV57196	Acey_s0022.g615.t1	Bm8358	Y76A2B.1d	M51312832
EFV57197	Acey_s0190.g1256.t3	Bm3508	ZK675.2	M51301542
EFV57201	Acey_s0003.g1500.t1	Bm14778	T12D8.8	M51306998
EFV57202	Acey_s0066.g3778.t1	Bm3096d	E02H1.3	M51307366
EFV57225	Acey_s0410.g948.t2	Bm1850d	B0547.1	M51311666
EFV57233	Acey_s0569.g73.t5	Bm8689	T20B12.6a	M51304580
EFV57237	Acey_s0405.g872.t3	Bm12648	H23L24.3b	M51301628
EFV57254	Acey_s0277.g1109.t1	Bm1765a	B0336.10	M51309982
EFV57260	Acey_s0051.g2096.t2	Bm11223	Y57G11A.5	M51303610
EFV57271	Acey_s0141.g2270.t1	Bm14063	Y73B6BL.43	M51307052
EFV57299	Acey_s0012.g1892.t1	Bm3964	F54E7.9	M51308818
EFV57304	Acey_s0002.g528.t1	Bm9534	C09G12.8a	M51300468
EFV57314	Acey_s0203.g1808.t2	Bm13847c	C24H11.7b	M51304500
EFV57316	Acey_s0002.g518.t3	Bm7607b	ZK1010.3	M51309557
EFV57325	Acey_s0528.g2980.t2	Bm5083d	M02B7.3b	M51304582
EFV57352	Acey_s0019.g3769.t1	Bm2102	C09F5.2a	M51303074
EFV57356	Acey_s0033.g2669.t2	Bm6178	W04B5.4	M51306284
EFV57358	Acey_s0010.g987.t3	Bm1798	B0412.3	M51306280
EFV57365	Acey_s0024.g1002.t3	Bm2143e	C10G11.5a	M51305946
EFV57367	Acey_s0389.g514.t1	Bm5879	T21B10.1	M51302917
EFV57375	Acey_s0421.g1165.t3	Bm8446	F20D6.4c	M51306373
EFV57378	Acey_s0027.g1584.t2	Bm1849	F37A8.5	M51302919
EFV57379	Acey_s0429.g1300.t1	Bm2209	C14H10.2a	M51311672
EFV57390	Acey_s0004.g2073.t1	Bm14782	T05A12.2c	M51306676
EFV57393	Acey_s0043.g888.t1	Bm13882f	Y71A12B.1a	M51302968
EFV57401	Acey_s0532.g3041.t1	Bm5869	T20G5.5	M51301557
EFV57402	Acey_s0020.g184.t1	Bm4816	K04G7.4b	M51301559
EFV57403	Acey_s0037.g3460.t3	Bm5051	M01F1.3	M51301558
EFV57406	Acey_s0137.g2012.t3	Bm11138	R144.2a	M51300765
EFV57409	Acey_s0634.g912.t4	Bm3238	F09F7.7b	M51311785
EFV57410	Acey_s0588.g353.t4	Bm4180	F47D12.4b	M51306357
EFV57413	Acey_s0061.g3299.t3	Bm757	F44B9.4b	M51301589
EFV57420	Acey_s0018.g3496.t1	Bm7633	ZK1128.2a	M51300733
EFV57430	Acey_s0180.g820.t2	Bm5059b	F26A3.3	M51303053
EFV57431	Acey_s0460.g1851.t2	Bm2305	C18E9.6	M51301582
EFV57437	Acey_s0165.g47.t1	Bm2464c	C29E4.3a	M51303454
EFV57444	Acey_s0086.g1965.t1	Bm1700a	B0041.4	M51302672
EFV57449	Acey_s0005.g2765.t1	Bm14051	F59E10.3	M51311693
EFV57451	Acey_s0103.g3530.t1	Bm2685	C40H1.6	M51311691
EFV57456	Acey_s0401.g772.t3	Bm4437	F55F8.4	M51307139
EFV57458	Acey_s0041.g468.t1	Bm5505a	C53D5.5a	M51307140
EFV57471	Acey_s0102.g3496.t1	Bm6914	Y57G11C.33a	M51305010
EFV57479	Acey_s0086.g1988.t1	Bm1703	B0205.3	M51300873
EFV57481	Acey_s0187.g1124.t2	Bm12673	W06G6.1	M51313156
EFV57482	Acey_s0301.g1823.t1	Bm2285	C18A3.3	M51307360
EFV57488	Acey_s0604.g546.t1	Bm3894	Y56A3A.19	M51301133
EFV57489	Acey_s0353.g3293.t4	Bm12593	F55F10.1a	M51305069
EFV57490	Acey_s0003.g1183.t5	Bm2654	C37H5.5	M51309186
EFV57497	Acey_s0007.g3206.t1	Bm14675	F45G2.8	M51303090
EFV57500	Acey_s0099.g3189.t1	Bm5906	T22A3.5a	M51303092
EFV57516	Acey_s0283.g1324.t2	Bm13985	C16A3.4	M51313382
EFV57521	Acey_s0013.g1932.t1	Bm4454a	F56A11.1	M51301409
EFV57522	Acey_s0207.g2010.t1	Bm5713b	T10F2.1b	M51301407
EFV57529	Acey_s0403.g834.t2	Bm12130c	C53A5.13a	M51301501
EFV57535	Acey_s0480.g2238.t1	Bm9208	R11A5.2	M51303608
EFV57539	Acey_s0028.g1716.t1	Bm2712e	C42D8.5a	M51307059
EFV57540	Acey_s0226.g2781.t1	Bm6451	Y39A1A.22	M51311718
EFV57541	Acey_s0011.g1457.t2	Bm6459	Y39A3CR.3a	M51304564
EFV57544	Acey_s0128.g1435.t1	Bm4624	T23B12.2	M51310376
EFV57546	Acey_s0127.g1409.t1	Bm10520	Y70D2A.2	M51307548
EFV57562	Acey_s0018.g3511.t2	Bm1536	F22B7.10	M51313918
EFV57564	Acey_s0212.g2259.t1	Bm2956	C55B7.9	M51310007
EFV57567	Acey_s0599.g474.t5	Bm1886a	B0432.13	M51306127
EFV57568	Acey_s0011.g1497.t1	Bm11949	Y54F10AL.1a	M51306130
EFV57584	Acey_s0208.g2061.t1	Bm4490	F56F3.5	M51305806
EFV57589	Acey_s0023.g729.t2	Bm13874b	T01C3.7	M51304544
EFV57596	Acey_s0014.g2463.t1	Bm6227	W07E11.1b	M51303507
EFV57606	Acey_s0293.g1617.t2	Bm3000	D1007.15	M51312613
EFV57612	Acey_s0179.g707.t1	Bm3885	F37A4.8	M51307556
EFV57619	Acey_s0053.g2353.t1	Bm6725b	Y51H1A.4	M51307632
EFV57630	Acey_s0002.g1062.t1	Bm10657	R05H5.3	M51303734
EFV57635	Acey_s0022.g612.t2	Bm4718	K01A11.1	M51303738
EFV57637	Acey_s0004.g2129.t1	Bm7605g	F32A5.2b	M51309544
EFV57649	Acey_s0278.g1164.t4	Bm6256	W09D10.4	M51310883
EFV57652	Acey_s0131.g1595.t6	Bm1887	Y113G7A.8a	M51307368
EFV57653	Acey_s0116.g535.t1	Bm2504	C32A3.3b	M51306156
EFV57656	Acey_s0103.g3523.t1	Bm5430	R151.3	M51307000
EFV57667	Acey_s0189.g1218.t1	Bm6551	Y43H11AL.2a	M51304534
EFV57673	Acey_s0154.g2962.t5	Bm8172b	C08H9.16	M51311504
EFV57679	Acey_s0333.g2817.t1	Bm7521	ZK652.3	M51302994
EFV57681	Acey_s0042.g671.t2	Bm4641	F19H8.1b	M51302996
EFV57687	Acey_s0261.g546.t1	Bm2311	C18G1.5	M51309192
EFV57691	Acey_s0019.g3829.t4	Bm5138	M142.1a	M51303805
EFV57695	Acey_s0048.g1662.t2	Bm2359y	C25A1.11a	M51307069
EFV57696	Acey_s0245.g3549.t1	Bm9631	C36E6.2	M51307065
EFV57697	Acey_s0473.g2081.t3	Bm4859	K07A12.3	M51310196
EFV57716	Acey_s0046.g1300.t1	Bm6383	Y37D8A.14	M51303003
EFV57723	Acey_s0053.g2379.t2	Bm4232f	Y43D4A.6	M51300206
EFV57733	Acey_s0051.g2086.t1	Bm12866	CC8.2b	M51305609
EFV57735	Acey_s0180.g801.t3	Bm3387	F26E4.10b	M51301346
EFV57743	Acey_s0217.g2406.t5	Bm13766	ZK370.5	M51301629
EFV57745	Acey_s0107.g3792.t1	Bm5614	T06D8.6	M51301890
EFV57748	Acey_s0215.g2360.t1	Bm7598e	ZK973.1	M51304593
EFV57783	Acey_s0012.g1762.t1	Bm7632	ZK1128.1	M51310058
EFV57797	Acey_s0234.g3125.t1	Bm7279	Y110A7A.9b	M51310981
EFV57803	Acey_s0115.g481.t2	Bm3214	C28H8.4	M51301637
EFV57809	Acey_s0013.g1918.t1	Bm4077	F44A6.1b	M51305656
EFV57812	Acey_s0021.g244.t3	Bm1926	C02H7.2	M51310554
EFV57823	Acey_s0492.g2414.t1	Bm5044	M01E11.1	M51305087
EFV57824	Acey_s0090.g2353.t2	Bm5840	Y54F10AM.6	M51310047
EFV57827	Acey_s0001.g141.t2	Bm1774	B0361.6	M51307555
EFV57838	Acey_s0072.g685.t1	Bm8889	Y51F10.3a	M51305200
EFV57840	Acey_s0005.g2706.t2	Bm8273	F10E9.6b	M51304954
EFV57850	Acey_s0234.g3149.t1	Bm6170	Y45G5AM.2	M51302259
EFV57851	Acey_s0785.g2343.t1	Bm5454	Y75B12B.2	M51310465
EFV57862	Acey_s0102.g3468.t1	Bm5343	F46G10.7c	M51306639
EFV57870	Acey_s0367.g24.t3	Bm5540d	T04C9.4d	M51300112
EFV57874	Acey_s0019.g3930.t1	Bm4256	F40F9.6a	M51305009
EFV57903	Acey_s0111.g225.t1	Bm6054	T27F6.5d	M51303785
EFV57904	Acey_s0021.g454.t1	Bm6868a	Y56A3A.1a	M51310565
EFV57913	Acey_s0036.g3360.t1	Bm6165	W03F9.10	M51309162
EFV57915	Acey_s0322.g2432.t2	Bm5202	R04B3.2	M51304298
EFV57916	Acey_s0089.g2277.t3	Bm2468	C29F5.1	M51300722
EFV57938	Acey_s0162.g3405.t1	Bm4587	F59C6.5	M51310090
EFV57941	Acey_s0061.g3205.t2	Bm10146	R05H10.6	M51308456
EFV57943	Acey_s0062.g3366.t2	Bm7290	Y111B2A.15	M51309642
EFV57945	Acey_s0002.g796.t2	Bm5318e	F07A5.1b	M51305288
EFV57949	Acey_s0770.g2215.t1	Bm10039	ZK652.10	M51306076
EFV57966	Acey_s0266.g684.t1	Bm3882	F37A4.1	M51311701
EFV57972	Acey_s0006.g2977.t4	Bm3142	C55C3.1	M51304310
EFV57979	Acey_s0333.g2820.t4	Bm2483	C30C11.2	M51305730
EFV57981	Acey_s0149.g2681.t3	Bm5990	F52C12.2	M51307331
EFV57986	Acey_s0031.g2256.t1	Bm10503	F53E10.6	M51302215
EFV57990	Acey_s0117.g684.t1	Bm9645	Y47D3A.26a	M51313383
EFV58008	Acey_s0035.g3074.t1	Bm6884	Y56A3A.32c	M51304993
EFV58014	Acey_s0064.g3495.t1	Bm7859	R05D3.12d	M51310101
EFV58028	Acey_s0334.g2844.t1	Bm13947b	C05D11.11a	M51311586
EFV58032	Acey_s0333.g2791.t1	Bm13681	F48E8.5	M51301411
EFV58043	Acey_s0710.g1732.t2	Bm4109	F45E12.2	M51306235
EFV58045	Acey_s0021.g447.t1	Bm7135a	Y75B8A.7	M51303639
EFV58056	Acey_s0279.g1203.t2	Bm4697c	K11E8.1r	M51306491
EFV58065	Acey_s0245.g3551.t1	Bm6740b	C36E6.3	M51307057
EFV58068	Acey_s0059.g3022.t1	Bm2233	C15H11.9	M51300217
EFV58070	Acey_s0009.g485.t1	Bm4537a	T24C4.5	M51301483
EFV58078	Acey_s0992.g3330.t1	Bm7583	C44B11.3	M51311242
EFV58083	Acey_s0201.g1757.t1	Bm1727f	Y48G1BL.2a	M51309201
EFV58088	Acey_s0096.g2925.t4	Bm6753	Y53F4B.3	M51312084
EFV58089	Acey_s0143.g2403.t2	Bm6259c	W09G3.2	M51305219
EFV58090	Acey_s0017.g3342.t1	Bm5475b	C50H2.3b	M51309605
EFV58096	Acey_s0135.g1914.t1	Bm8359	K01G5.5	M51303292
EFV58102	Acey_s0196.g1518.t4	Bm6878c	Y56A3A.20	M51300741
EFV58107	Acey_s0321.g2418.t2	Bm2199	Y67D8A.2i	M51303413
EFV58109	Acey_s0128.g1462.t1	Bm5356	F01G10.7	M51311121
EFV58116	Acey_s0083.g1635.t6	Bm7522	Y53C12C.1	M51303709
EFV58120	Acey_s0756.g2089.t1	Bm1685	F35H12.4	M51308131
EFV58131	Acey_s0257.g407.t1	Bm3445a	F19B6.1d	M51312113
EFV58132	Acey_s0036.g3360.t5	Bm13968	W03F9.1b	M51307154
EFV58134	Acey_s0040.g301.t1	Bm4360b	F54D5.8	M51300433
EFV58139	Acey_s0473.g2083.t1	Bm4337c	F54B3.3	M51304151
EFV58141	Acey_s0203.g1812.t3	Bm6475	T18D3.3a	M51304994
EFV58144	Acey_s0695.g1597.t1	Bm5994	T24H10.3	M51310882
EFV58156	Acey_s0001.g231.t1	Bm1795	B0410.2a	M51310194
EFV58163	Acey_s0043.g761.t1	Bm2981d	ZK662.3b	M51307869
EFV58167	Acey_s0203.g1806.t2	Bm2349	Y55F3AM.8b	M51307025
EFV58168	Acey_s0028.g1783.t2	Bm5800	T14G11.3	M51307023
EFV58174	Acey_s0011.g1501.t2	Bm1732b	B0280.3	M51307024
EFV58177	Acey_s0003.g1479.t4	Bm7621c	ZK1098.1a	M51308266
EFV58183	Acey_s0064.g3523.t1	Bm5852	ZK1098.10a	M51305474
EFV58184	Acey_s0008.g298.t1	Bm5408	R74.1	M51303662
EFV58192	Acey_s0672.g1386.t1	Bm5679b	T08G11.4b	M51302811
EFV58197	Acey_s0781.g2314.t1	Bm13850	K07A3.1a	M51306125
EFV58198	Acey_s0874.g2811.t4	Bm7512	ZK637.7a	M51310169
EFV58199	Acey_s0203.g1834.t2	Bm5671c	T08A11.2	M51302967
EFV58201	Acey_s0267.g759.t2	Bm4348a	F54C8.7a	M51301459
EFV58204	Acey_s0023.g799.t1	Bm7134a	Y75B8A.6	M51304944
EFV58215	Acey_s0245.g3572.t1	Bm5669	T08A9.3	M51303553
EFV58221	Acey_s0110.g200.t1	Bm3007	D1022.8	M51307031
EFV58255	Acey_s0378.g300.t3	Bm6790	Y54E5B.3b	M51308144
EFV58261	Acey_s0018.g3584.t1	Bm1986	C05D11.9	M51309881
EFV58265	Acey_s0436.g1434.t4	Bm5212	R05D3.2	M51303369
EFV58278	Acey_s0247.g57.t1	Bm8868	Y65B4BR.5a	M51308771
EFV58282	Acey_s0063.g3476.t1	Bm9239b	Y73B3A.18a	M51313077
EFV58290	Acey_s0230.g2940.t2	Bm7643a	F38E9.1	M51305462
EFV58292	Acey_s0493.g2430.t1	Bm5646	T07D1.2	M51303341
EFV58293	Acey_s0045.g1126.t1	Bm5034	F19B6.2b	M51302581
EFV58303	Acey_s0043.g799.t1	Bm6570b	Y45F10D.12	M51300758
EFV58305	Acey_s0138.g2076.t2	Bm4588	F59C6.7a	M51300754
EFV58307	Acey_s0066.g3780.t2	Bm6204	W06B4.2	M51310430
EFV58309	Acey_s0019.g3804.t1	Bm9824	ZK593.5b	M51309790
EFV58312	Acey_s0336.g2893.t4	Bm7827	C02D4.2c	M51308021
EFV58316	Acey_s0340.g2998.t1	Bm4414a	F55C5.5	M51308192
EFV58320	Acey_s0050.g1986.t1	Bm14766	F44C4.5	M51303451
EFV58323	Acey_s0154.g2994.t2	Bm7677	T10H4.12	M51302609
EFV58326	Acey_s0650.g1135.t2	Bm5413	C07H6.3	M51301789
EFV58333	Acey_s0069.g328.t2	Bm1829a	B0495.8a	M51301478
EFV58339	Acey_s0046.g1306.t1	Bm2421	C33B4.3a	M51311947
EFV58345	Acey_s0006.g2873.t4	Bm6525	K04G2.2	M51302154
EFV58347	Acey_s0871.g2798.t3	Bm5057	M01G5.3	M51301375
EFV58350	Acey_s0085.g1861.t2	Bm7462b	ZK816.4	M51311723
EFV58353	Acey_s0304.g1936.t2	Bm4555	F58E10.4	M51303466
EFV58355	Acey_s0022.g588.t1	Bm16942a	F57B9.4a	M51305045
EFV58359	Acey_s0259.g502.t1	Bm7574	ZK858.7	M51300544
EFV58367	Acey_s0017.g3438.t1	Bm6387b	Y37D8A.18	M51311983
EFV58378	Acey_s0019.g3852.t2	Bm13845d	F10G8.9b	M51312643
EFV58388	Acey_s0904.g2968.t1	Bm6774	Y53G8B.4b	M51301495
EFV58393	Acey_s0537.g3116.t2	Bm3497b	F21H11.2a	M51311606
EFV58395	Acey_s0050.g1898.t1	Bm7314	Y116A8C.25a	M51311603
EFV58396	Acey_s0041.g425.t1	Bm4878	H38K22.3	M51303576
EFV58400	Acey_s0039.g137.t2	Bm5982	C08B11.1	M51301427
EFV58401	Acey_s0745.g2004.t1	Bm11117	F25H2.6	M51301467
EFV58402	Acey_s0396.g686.t1	Bm3629e	M01F1.4a	M51310294
EFV58408	Acey_s0093.g2668.t1	Bm327	F10D7.3	M51300924
EFV58416	Acey_s0028.g1695.t1	Bm3707	F30A10.9	M51305106
EFV58431	Acey_s0068.g257.t4	Bm3185	C56C10.9	M51303572
EFV58432	Acey_s0853.g2690.t1	Bm3760c	F32D1.9	M51300553
EFV58434	Acey_s0141.g2227.t1	Bm2320	C23G10.3	M51301635
EFV58461	Acey_s0007.g3225.t1	Bm5818	ZK637.3	M51301400
EFV58464	Acey_s0116.g537.t1	Bm13894	D1007.12	M51310739
EFV58469	Acey_s0078.g1161.t1	Bm14027a	F52B11.2a	M51307079
EFV58473	Acey_s0315.g2259.t1	Bm5977	R08D7.3	M51305509
EFV58474	Acey_s0067.g81.t1	Bm14081	C06B8.8	M51303529
EFV58480	Acey_s0213.g2279.t3	Bm12107	T01C4.1	M51310624
EFV58491	Acey_s0048.g1726.t1	Bm2258	C16E9.2b	M51309643
EFV58492	Acey_s0153.g2923.t1	Bm4331	R08E5.2c	M51311563
EFV58494	Acey_s0096.g2908.t2	Bm4586	K03B8.5	M51310034
EFV58508	Acey_s0306.g1989.t2	Bm7444	ZK287.1a	M51311789
EFV58515	Acey_s0175.g509.t2	Bm4572c	F59A2.1a	M51301641
EFV58516	Acey_s0234.g3142.t1	Bm7261d	Y47G6A.20c	M51308778
EFV58521	Acey_s0234.g3155.t3	Bm5560	F23C8.5a	M51308255
EFV58524	Acey_s0850.g2680.t1	Bm13754	T05H4.6a	M51308261
EFV58536	Acey_s0231.g3009.t5	Bm13772a	Y38C1AA.11	M51303098
EFV58537	Acey_s0098.g3102.t2	Bm7457	ZK353.1b	M51305467
EFV58543	Acey_s0012.g1890.t1	Bm2247	C16C10.4	M51311188
EFV58548	Acey_s0237.g3267.t2	Bm7665	ZK1307.8	M51306989
EFV58549	Acey_s0026.g1411.t1	Bm13770	E02H1.1	M51303314
EFV58552	Acey_s0057.g2762.t1	Bm6953	Y62E10A.12a	M51312892
EFV58553	Acey_s0016.g3062.t1	Bm13962	T13H5.4	M51302660
EFV58554	Acey_s0365.g3586.t1	Bm4762	K02E10.2a	M51301698
EFV58556	Acey_s0291.g1559.t1	Bm13744	C14A4.1	M51306319
EFV58557	Acey_s0093.g2641.t4	Bm4739	K02A4.1	M51311712
EFV58560	Acey_s0149.g2722.t5	Bm3783	F33A8.5	M51300655
EFV58568	Acey_s0304.g1939.t2	Bm4375d	F54E7.3g	M51305556
EFV58572	Acey_s0008.g213.t1	Bm6691	D2063.3a	M51310353
EFV58575	Acey_s0604.g548.t1	Bm3893c	F37C12.2	M51305535
EFV58588	Acey_s0108.g5.t6	Bm6457	Y39A3CL.6	M51309168
EFV58605	Acey_s0856.g2712.t1	Bm7304b	Y113G7B.23c	M51309377
EFV58606	Acey_s0232.g3048.t1	Bm5850c	T19E7.3a	M51314116
EFV58616	Acey_s0557.g3401.t2	Bm10829	ZK520.4a	M51300547
EFV58619	Acey_s0217.g2407.t2	Bm13852	ZK1098.4	M51302892
EFV58627	Acey_s0093.g2669.t1	Bm8054	F10D7.2	M51306961
EFV58631	Acey_s0026.g1297.t4	Bm5271	R07D5.1b	M51302542
EFV58633	Acey_s0550.g3308.t5	Bm7291	F54F7.1	M51309641
EFV58637	Acey_s0725.g1861.t5	Bm3939	C02B8.12	M51306398
EFV58646	Acey_s0009.g451.t1	Bm12657	F26F4.11	M51306396
EFV58647	Acey_s0098.g3079.t2	Bm7139d	Y75B8A.22	M51303428
EFV58659	Acey_s0065.g3594.t5	Bm6890	F09E5.5	M51302918
EFV58666	Acey_s0368.g67.t1	Bm7301	Y113G7B.16	M51303487
EFV58673	Acey_s0065.g3664.t1	Bm5213	R05D3.3	M51310621
EFV58691	Acey_s0310.g2093.t2	Bm11183	Y48G9A.3	M51303522
EFV58705	Acey_s0360.g3451.t1	Bm12541	C03E10.4	M51303526
EFV58708	Acey_s0053.g2279.t1	Bm4743	K02A11.3	M51309649
EFV58714	Acey_s0226.g2772.t3	Bm11111	ZK455.1	M51303742
EFV58715	Acey_s0020.g109.t1	Bm5562b	T04H1.4b	M51306501
EFV58736	Acey_s0143.g2369.t2	Bm3720	F31C3.5	M51307082
EFV58751	Acey_s0011.g1473.t1	Bm14035	Y47D3A.21	M51307848
EFV58754	Acey_s0709.g1725.t1	Bm3639	W06B3.1	M51307825
EFV58757	Acey_s0041.g420.t1	Bm6289b	Y6D11A.2	M51305726
EFV58763	Acey_s0003.g1533.t1	Bm6765	Y53F4B.42	M51311707
EFV58764	Acey_s0740.g1970.t1	Bm7014	Y69A2AR.7a	M51303396
EFV58765	Acey_s0226.g2770.t1	Bm6234	C02E7.1	M51301462
EFV58768	Acey_s0687.g1533.t2	Bm2385	C25H3.9b	M51301989
EFV58771	Acey_s0219.g2471.t4	Bm14720	Y62F5A.1b	M51309620
EFV58772	Acey_s0191.g1322.t1	Bm7612	ZK1058.4	M51305716
EFV58794	Acey_s0191.g1309.t2	Bm4729d	K01G5.1	M51305055
EFV58795	Acey_s0108.g70.t1	Bm5517	T13B5.1	M51303381
EFV58808	Acey_s0687.g1532.t1	Bm4111	F45E12.5a	M51305495
EFV58812	Acey_s0025.g1288.t4	Bm6924	Y53G8AR.2b	M51300472
EFV58818	Acey_s0514.g2776.t1	Bm5648	F28A10.9	M51305686
EFV58820	Acey_s0050.g1884.t5	Bm2720d	C43E11.8	M51307149
EFV58823	Acey_s0852.g2688.t1	Bm10026	K12H6.3	M51303453
EFV58826	Acey_s0001.g115.t4	Bm4039a	VZC374L.1	M51306472
EFV58830	Acey_s0002.g521.t2	Bm6186	R151.2c	M51309913
EFV58865	Acey_s0103.g3522.t4	Bm5026	K12H4.8	M51303922
EFV58871	Acey_s0017.g3393.t2	Bm4089h	F44E2.10	M51300712
EFV58875	Acey_s0085.g1809.t1	Bm3579	F25G6.2	M51306104
EFV58892	Acey_s0003.g1516.t1	Bm3775	F32H2.1b	M51305501
EFV58899	Acey_s0405.g868.t2	Bm2277	C08B6.9	M51305967
EFV58901	Acey_s0093.g2657.t1	Bm3372e	ZK455.3	M51311133
EFV58915	Acey_s0041.g476.t2	Bm6693	Y49E10.19	M51308339
EFV58930	Acey_s0083.g1628.t1	Bm2271	C52B11.2	M51305989
EFV58933	Acey_s0005.g2293.t2	Bm2747	C44B11.1	M51305661
EFV58939	Acey_s0053.g2339.t1	Bm1969	K01C8.3a	M51303577
EFV58949	Acey_s0033.g2743.t1	Bm4993	K10G9.3a	M51301397
EFV58951	Acey_s0352.g3247.t1	Bm4850	Y71H2AR.1	M51308145
EFV58952	Acey_s0007.g3537.t1	Bm9850	R151.9	M51310575
EFV58953	Acey_s0001.g123.t2	Bm3941	F39G3.8	M51310137
EFV58965	Acey_s0059.g3014.t5	Bm6012	F48A11.1b	M51300407
EFV58974	Acey_s0020.g4.t2	Bm7300c	Y113G7A.11	M51305882
EFV58983	Acey_s0037.g3485.t1	Bm3204	F08F8.7	M51306899
EFV58989	Acey_s0091.g2473.t4	Bm9132	C56G3.2	M51310771
EFV58998	Acey_s0909.g2992.t1	Bm5590	T24B8.6	M51301217
EFV59002	Acey_s0926.g3069.t4	Bm15492	F36H1.6	M51308417
EFV59010	Acey_s0511.g2744.t1	Bm6859g	Y55F3AM.15	M51309779
EFV59013	Acey_s0177.g572.t1	Bm4925	C54G10.2a	M51303934
EFV59014	Acey_s0308.g2052.t2	Bm8039	E03A3.6a	M51314126
EFV59020	Acey_s0125.g1272.t1	Bm5241c	R06A4.8	M51306054
EFV59022	Acey_s0376.g253.t1	Bm10935	F09B9.5	M51300126
EFV59024	Acey_s0004.g2035.t3	Bm1935	C53A5.5a	M51304636
EFV59029	Acey_s0026.g1342.t4	Bm9885	Y55F3BL.1	M51304698
EFV59030	Acey_s0172.g375.t1	Bm3181b	F08B4.5	M51304700
EFV59032	Acey_s0002.g983.t1	Bm2907c	C53B4.7e	M51308549
EFV59039	Acey_s0058.g2915.t3	Bm2569	R06A10.2a	M51300530
EFV59041	Acey_s0045.g1250.t1	Bm6181	W04D2.5	M51302235
EFV59046	Acey_s0198.g1602.t2	Bm5475a	F31A9.3b	M51311206
EFV59049	Acey_s0085.g1878.t1	Bm2949	C55A6.9	M51300127
EFV59050	Acey_s0513.g2763.t1	Bm4234	Y48C3A.17c	M51308020
EFV59079	Acey_s0057.g2825.t1	Bm5081b	M03C11.7	M51300902
EFV59080	Acey_s0274.g1027.t1	Bm1692	B0035.3	M51311160
EFV59100	Acey_s0368.g57.t1	Bm4135	F46B6.12	M51301791
EFV59113	Acey_s0214.g2319.t1	Bm13558	C48D1.3	M51303938
EFV59121	Acey_s0047.g1533.t1	Bm3721	F31C3.6a	M51311571
EFV59124	Acey_s0004.g1959.t1	Bm3849d	T13F2.3a	M51311568
EFV59129	Acey_s0039.g58.t2	Bm10970	F58G1.8	M51301799
EFV59131	Acey_s0004.g1833.t2	Bm3905	C25A1.2	M51308544
EFV59133	Acey_s0003.g1647.t2	Bm5231	F33G12.2	M51308546
EFV59137	Acey_s0113.g388.t4	Bm4333	F54A5.1	M51300239
EFV59138	Acey_s0518.g2818.t1	Bm7663	C54C8.5	M51313991
EFV59139	Acey_s0314.g2235.t1	Bm2026	C06G3.9	M51304304
EFV59141	Acey_s0028.g1680.t1	Bm8338	C47B2.5	M51300734
EFV59144	Acey_s0229.g2900.t3	Bm5461a	T01C1.2	M51313957
EFV59150	Acey_s0016.g3070.t2	Bm3505	F22B5.10	M51308528
EFV59152	Acey_s0002.g552.t4	Bm14085a	K07B1.2	M51308531
EFV59164	Acey_s0009.g558.t3	Bm2788	C46A5.9	M51311949
EFV59174	Acey_s0076.g1033.t2	Bm1682d	T23G11.2	M51311164
EFV59175	Acey_s0001.g446.t1	Bm13900	F23H11.9b	M51311165
EFV59176	Acey_s0484.g2319.t1	Bm5315	R09E10.7	M51304748
EFV59188	Acey_s0067.g134.t1	Bm2887c	C51F7.1	M51310995
EFV59201	Acey_s0674.g1413.t1	Bm5291	R07G3.9	M51309685
EFV59205	Acey_s0282.g1282.t2	Bm3453	F19H6.2	M51310305
EFV59212	Acey_s0018.g3689.t2	Bm13807	T14G10.5a	M51307367
EFV59214	Acey_s0180.g760.t1	Bm6100	W01B6.1	M51300461
EFV59218	Acey_s0004.g2059.t1	Bm4129	F45H11.4a	M51307373
EFV59223	Acey_s0091.g2433.t4	Bm2556	JC8.10a	M51302747
EFV59225	Acey_s0002.g997.t2	Bm2549b	C33H5.18a	M51304745
EFV59230	Acey_s0031.g2346.t1	Bm3220b	F09D1.1	M51306462
EFV59267	Acey_s0174.g446.t1	Bm4235	K04C2.7	M51300133
EFV59274	Acey_s0607.g587.t3	Bm2438	Y37A1A.4f	M51300219
EFV59277	Acey_s0152.g2863.t5	Bm6015e	T25G12.13	M51310490
EFV59279	Acey_s0008.g193.t1	Bm11966	Y57G11C.22a	M51304254
EFV59284	Acey_s0414.g1023.t1	Bm13964a	T25B9.9	M51308066
EFV59288	Acey_s0007.g3521.t1	Bm6967	T09E8.3	M51306667
EFV59291	Acey_s0067.g76.t1	Bm3021	D1069.3b	M51308250
EFV59293	Acey_s0122.g1047.t3	Bm4156	T07A9.6	M51309105
EFV59299	Acey_s0100.g3301.t1	Bm4019d	F42A10.4b	M51306611
EFV59301	Acey_s0045.g1254.t1	Bm3412	F17A9.2	M51300145
EFV59302	Acey_s0639.g986.t2	Bm5686	T09A5.6	M51306668
EFV59307	Acey_s0012.g1914.t3	Bm5654c	F49E8.3a	M51304880
EFV59312	Acey_s0041.g444.t3	Bm5127	M88.2	M51312930
EFV59314	Acey_s0075.g974.t2	Bm10562	C10F3.5a	M51309085
EFV59325	Acey_s0064.g3519.t3	Bm7615	C01C7.1b	M51308204
EFV59329	Acey_s0004.g1717.t1	Bm7553	ZK809.3	M51308873
EFV59335	Acey_s0368.g58.t1	Bm5008	K11G9.4	M51303862
EFV59360	Acey_s0191.g1277.t2	Bm8784	C39D10.7	M51308514
EFV59373	Acey_s0084.g1781.t1	Bm4707b	JC8.6a	M51300092
EFV59378	Acey_s0196.g1533.t1	Bm2120	F41H10.11	M51307378
EFV59382	Acey_s0267.g753.t1	Bm14784	F53H8.4	M51309746
EFV59383	Acey_s0051.g2093.t1	Bm7396	ZC477.9a	M51308978
EFV59393	Acey_s0026.g1461.t1	Bm14044b	ZK856.10	M51311492
EFV59401	Acey_s0483.g2295.t2	Bm2861b	T24F1.6a	M51311516
EFV59404	Acey_s0156.g3134.t4	Bm4584	F59B2.2	M51301827
EFV59409	Acey_s0196.g1516.t1	Bm11250	Y56A3A.22	M51311123
EFV59410	Acey_s0032.g2603.t1	Bm8993	F42H10.2	M51308232
EFV59413	Acey_s0119.g880.t3	Bm2823	C47G2.3	M51303327
EFV59416	Acey_s0629.g841.t2	Bm7199	Y94H6A.9a	M51310852
EFV59418	Acey_s0132.g1710.t3	Bm5833	Y54G2A.25a	M51300268
EFV59429	Acey_s0423.g1206.t1	Bm3201f	F08F8.2	M51300164
EFV59434	Acey_s0206.g1996.t5	Bm10915	Y71H2AM.12	M51313076
EFV59435	Acey_s0375.g240.t1	Bm7038d	Y71F9AM.4b	M51303265
EFV59437	Acey_s0063.g3437.t2	Bm5709	T10C6.5	M51303278
EFV59441	Acey_s0151.g2813.t2	Bm3343c	F56C11.3	M51304548
EFV59446	Acey_s0087.g2107.t1	Bm8416b	F35G12.4a	M51303286
EFV59469	Acey_s0101.g3338.t1	Bm8333	C01H6.6	M51302153
EFV59470	Acey_s0368.g56.t1	Bm4133a	F46B6.4	M51303823
EFV59475	Acey_s0008.g278.t3	Bm6139	ZK546.14a	M51312249
EFV59490	Acey_s0008.g384.t2	Bm12115	F54E7.2	M51303659
EFV59494	Acey_s0386.g447.t2	Bm4330	F53H10.2d	M51305990
EFV59495	Acey_s0015.g2654.t4	Bm2503	C32A3.2	M51304515
EFV59501	Acey_s0087.g2090.t2	Bm3131	F44B9.1c	M51301817
EFV59505	Acey_s0001.g483.t2	Bm2666a	C38H2.1b	M51302625
EFV59507	Acey_s0476.g2152.t1	Bm4497	F56H1.1	M51308510
EFV59522	Acey_s0211.g2201.t1	Bm4405b	C10F3.2	M51307674
EFV59530	Acey_s1072.g3540.t4	Bm7068	Y71H2AM.5	M51307150
EFV59541	Acey_s0243.g3489.t2	Bm5729	T11G6.2a	M51307408
EFV59547	Acey_s0094.g2771.t1	Bm4153	F46F6.4d	M51303615
EFV59548	Acey_s0034.g2938.t1	Bm3089	E02A10.1	M51306603
EFV59558	Acey_s0598.g465.t1	Bm10163	ZK1193.5c	M51311535
EFV59570	Acey_s0018.g3537.t2	Bm4870	K07C5.6	M51308009
EFV59574	Acey_s0044.g1026.t1	Bm13768	F25H2.10	M51308008
EFV59576	Acey_s0015.g2818.t1	Bm1773	C34B2.7	M51305825
EFV59578	Acey_s0045.g1229.t1	Bm5418c	R119.6	M51308002
EFV59580	Acey_s0006.g2859.t1	Bm13933a	F55A12.8	M51310864
EFV59589	Acey_s0229.g2907.t4	Bm305	F54G8.2	M51300424
EFV59611	Acey_s0251.g182.t4	Bm4800	K04D7.3a	M51304300
EFV59620	Acey_s0428.g1284.t2	Bm3037c	ZK265.1a	M51308290
EFV59622	Acey_s0234.g3156.t1	Bm14043	C32E8.2b	M51310300
EFV59628	Acey_s0140.g2173.t3	Bm3757e	F32B6.8b	M51305332
EFV59639	Acey_s0004.g1930.t4	Bm6316c	F46C5.9	M51305660
EFV59640	Acey_s0001.g47.t1	Bm6308	Y17G7B.18a	M51306034
EFV59645	Acey_s0062.g3385.t1	Bm13940	T12A2.2	M51301123
EFV59649	Acey_s0741.g1977.t4	Bm4775c	K02H8.1a	M51306038
EFV59661	Acey_s0034.g2850.t1	Bm408	F07C6.1b	M51310651
EFV59686	Acey_s0093.g2625.t4	Bm6190a	T01B10.4b	M51310328
EFV59695	Acey_s0148.g2669.t3	Bm5493h	C48A7.1b	M51306768
EFV59697	Acey_s0055.g2554.t2	Bm2080b	C08G9.1	M51300139
EFV59699	Acey_s0403.g832.t1	Bm5803	T15B7.2	M51305265
EFV59700	Acey_s0111.g206.t1	Bm2842e	C48G7.3b	M51310301
EFV59704	Acey_s0045.g1260.t1	Bm6941	DC2.5a	M51310317
EFV59707	Acey_s0162.g3419.t4	Bm14750	K09H9.6	M51304241
EFV59708	Acey_s0035.g3140.t1	Bm6130	W02B12.15a	M51303326
EFV59717	Acey_s0016.g2916.t1	Bm7617	ZK1067.4	M51306547
EFV59723	Acey_s0180.g789.t3	Bm1677	F19B6.1c	M51308223
EFV59726	Acey_s0043.g793.t1	Bm1690	B0035.1a	M51312106
EFV59727	Acey_s0792.g2376.t1	Bm7320	Y116A8C.35a	M51312104
EFV59728	Acey_s0006.g2793.t1	Bm5109	M7.3	M51312103
EFV59734	Acey_s0139.g2111.t4	Bm7387	B0395.3	M51304731
EFV59738	Acey_s0049.g1817.t1	Bm14681b	Y17G7B.4	M51306474
EFV59740	Acey_s1009.g3379.t1	Bm13667e	K08D12.1	M51303897
EFV59751	Acey_s0086.g1946.t1	Bm2360	C37H5.2	M51310154
EFV59762	Acey_s0009.g516.t2	Bm13989	ZK637.5	M51308026
EFV59764	Acey_s0143.g2351.t1	Bm733	F53F10.3	M51305908
EFV59786	Acey_s1063.g3520.t1	Bm3898c	Y104H12D.3a	M51311891
EFV59796	Acey_s0008.g241.t1	Bm14017b	Y73B6BL.3	M51303816
EFV59798	Acey_s0617.g699.t4	Bm2263o	C17D12.6b	M51307063
EFV59800	Acey_s0008.g65.t2	Bm6103	ZK287.2a	M51306452
EFV59803	Acey_s0032.g2459.t1	Bm4420	K03E6.3	M51302056
EFV59810	Acey_s0031.g2302.t6	Bm4765b	R11E3.8a	M51310164
EFV59811	Acey_s0026.g1444.t1	Bm6615b	B0379.4b	M51301932
EFV59817	Acey_s0145.g2480.t3	Bm12485	H24G06.1b	M51309238
EFV59823	Acey_s0023.g680.t1	Bm3689	F29C4.6	M51310005
EFV59824	Acey_s0008.g7.t1	Bm7552c	ZK809.2	M51310001
EFV59825	Acey_s0177.g573.t1	Bm1770r	Y39C12A.1	M51308542
EFV59828	Acey_s0099.g3174.t3	Bm13846	F46E10.8	M51309996
EFV59834	Acey_s0012.g1685.t1	Bm9708	C01G8.5a	M51307493
EFV59838	Acey_s0147.g2584.t5	Bm4650	H14N18.1c	M51301822
EFV59842	Acey_s0022.g506.t4	Bm2675	C39F7.2a	M51301826
EFV59851	Acey_s0025.g1247.t1	Bm3561	F25B4.2	M51304237
EFV59861	Acey_s0105.g3694.t3	Bm5598	T05H4.10	M51305296
EFV59896	Acey_s0282.g1270.t1	Bm14065a	ZK652.4	M51307689
EFV59898	Acey_s0114.g427.t2	Bm5661	C17H12.4	M51306829
EFV59905	Acey_s0400.g749.t1	Bm13859b	F59B8.2a	M51308401
EFV59907	Acey_s0108.g51.t2	Bm3437c	F18E2.3	M51305277
EFV59910	Acey_s1130.g3659.t3	Bm2368b	C25D7.6	M51300163
EFV59916	Acey_s0143.g2364.t4	Bm2674	C39E9.14a	M51306261
EFV59918	Acey_s0621.g751.t1	Bm4740	K02A4.2	M51303291
EFV59922	Acey_s0151.g2809.t1	Bm4146	B0403.4	M51306612
EFV59924	Acey_s0132.g1708.t1	Bm3332g	F13B12.1	M51305308
EFV59936	Acey_s0207.g2007.t5	Bm5515	T02H6.1b	M51300017
EFV59950	Acey_s0071.g544.t1	Bm3566	F25B5.6a	M51303343
EFV59962	Acey_s0009.g506.t1	Bm11557	C15F1.7b	M51310059
EFV59963	Acey_s0322.g2454.t1	Bm3298b	F11A10.5	M51304269
EFV59968	Acey_s0069.g398.t1	Bm4008	C40H1.4	M51306590
EFV59980	Acey_s0054.g2493.t1	Bm13967	R06C7.5a	M51306804
EFV59996	Acey_s0004.g2252.t2	Bm3698a	K03A11.3	M51308225
EFV59999	Acey_s0018.g3501.t3	Bm7130	F31E8.2a	M51301811
EFV60001	Acey_s0321.g2425.t6	Bm5397	W04D2.1a	M51306670
EFV60018	Acey_s0002.g1041.t1	Bm2906e	C53B4.4f	M51307531
EFV60024	Acey_s0111.g226.t3	Bm6630b	Y47H9C.7	M51300281
EFV60030	Acey_s0191.g1314.t1	Bm2252	C16C10.10	M51311127
EFV60036	Acey_s0016.g3058.t1	Bm3671	F28C6.7a	M51311129
EFV60037	Acey_s0103.g3588.t1	Bm6088c	VF36H2L.1	M51301935
EFV60038	Acey_s0018.g3701.t1	Bm13917	Y62E10A.6	M51309621
EFV60039	Acey_s0018.g3700.t2	Bm6950	Y62E10A.2	M51311131
EFV60047	Acey_s0034.g2880.t1	Bm6120	F43D2.4b	M51307525
EFV60050	Acey_s0004.g2198.t3	Bm6517a	Y41D4B.13a	M51307530
EFV60054	Acey_s0023.g678.t2	Bm4546	F58B3.6	M51311157
EFV60063	Acey_s0394.g635.t1	Bm2148	C11D2.4	M51302220
EFV60068	Acey_s0151.g2810.t1	Bm14042	T05E11.1	M51306023
EFV60080	Acey_s0301.g1822.t2	Bm5778b	T13H5.5	M51301869
EFV60084	Acey_s0258.g422.t3	Bm8660	C15C8.3a	M51301139
EFV60087	Acey_s0454.g1745.t2	Bm10440b	C43E11.3a	M51302493
EFV60097	Acey_s0040.g168.t2	Bm2339	C24F3.1b	M51308406
EFV60102	Acey_s0042.g560.t1	Bm3774	F32G8.6	M51310948
EFV60103	Acey_s0389.g530.t1	Bm13941d	B0250.1	M51310949
EFV60105	Acey_s0130.g1539.t2	Bm2899	C52E12.1	M51309768
EFV60112	Acey_s0228.g2864.t1	Bm5022	F40F9.9	M51301862
EFV60114	Acey_s0342.g3046.t1	Bm2051	C07G1.4a	M51304774
EFV60115	Acey_s0122.g1055.t1	Bm4177	F47B10.1	M51300109
EFV60117	Acey_s0027.g1571.t1	Bm5510	K01A6.2c	M51303814
EFV60121	Acey_s0170.g259.t3	Bm11667	C34E11.3a	M51306530
EFV60125	Acey_s0222.g2599.t1	Bm2863	C50D2.5	M51307462
EFV60129	Acey_s0227.g2835.t1	Bm2489	C30G7.2b	M51311534
EFV60134	Acey_s0009.g478.t1	Bm6243	T28F3.5b	M51309712
EFV60137	Acey_s0533.g3049.t2	Bm7294a	F54E7.1a	M51303368
EFV60140	Acey_s0200.g1701.t3	Bm1695	Y39C12A.8	M51312675
EFV60141	Acey_s0056.g2647.t1	Bm8316	ZK185.2	M51312672
EFV60142	Acey_s0012.g1758.t1	Bm4664	H20J04.5	M51303589
EFV60143	Acey_s0026.g1348.t3	Bm1693a	B0035.11	M51310850
EFV60151	Acey_s0199.g1659.t1	Bm1945a	C04C3.5a	M51305015
EFV60157	Acey_s0528.g2974.t2	Bm5939	T23B5.4b	M51302466
EFV60161	Acey_s0177.g587.t5	Bm6747c	F35H8.7	M51300234
EFV60162	Acey_s0165.g44.t1	Bm14465	Y54G2A.75	M51300066
EFV60165	Acey_s0362.g3514.t2	Bm14079	F46F11.4	M51310446
EFV60166	Acey_s0121.g968.t1	Bm5383y	R12B2.1b	M51301622
EFV60168	Acey_s0018.g3505.t2	Bm6532	Y43B11AR.3	M51310452
EFV60170	Acey_s0033.g2770.t2	Bm5370	R12E2.13	M51310497
EFV60173	Acey_s0134.g1867.t1	Bm13996	Y77E11A.6a	M51311942
EFV60181	Acey_s0186.g1071.t2	Bm8538	F13B9.8b	M51305271
EFV60187	Acey_s0575.g199.t1	Bm1751	F08F3.7	M51305323
EFV60188	Acey_s0001.g193.t4	Bm4434c	Y47D3A.15	M51313158
EFV60190	Acey_s0583.g299.t3	Bm3054c	F40G12.10	M51307077
EFV60191	Acey_s0196.g1529.t2	Bm12007	Y55F3AM.4b	M51305315
EFV60199	Acey_s0014.g2225.t3	Bm13895b	F25H2.11	M51313369
EFV60201	Acey_s0791.g2368.t2	Bm3743b	F32A6.3c	M51308486
EFV60207	Acey_s0043.g788.t1	Bm7558a	ZK829.4	M51307421
EFV60214	Acey_s0004.g2057.t1	Bm13857a	T13A10.11a	M51310014
EFV60217	Acey_s0514.g2767.t1	Bm7726	T02E1.5b	M51303205
EFV60220	Acey_s0090.g2390.t4	Bm7120	Y73F8A.24a	M51309705
EFV60230	Acey_s0300.g1810.t1	Bm4917b	K08E4.1	M51306671
EFV60234	Acey_s0003.g1465.t1	Bm8870b	W08D2.5a	M51307049
EFV60239	Acey_s0628.g828.t3	Bm7245	F44D12.1b	M51304042
EFV60256	Acey_s0201.g1719.t1	Bm6613	Y47D7A.16	M51311088
EFV60271	Acey_s0268.g777.t1	Bm4461	F56B6.4a	M51310866
EFV60285	Acey_s0115.g514.t4	Bm7092	Y72A10A.1	M51307420
EFV60294	Acey_s0705.g1682.t1	Bm4011c	F42A6.6a	M51303943
EFV60304	Acey_s0239.g3310.t1	Bm1691	B0035.2	M51307511
EFV60316	Acey_s0053.g2312.t2	Bm6272	W10D5.3g	M51303937
EFV60320	Acey_s0587.g344.t1	Bm7409a	ZC518.2	M51300113
EFV60321	Acey_s0007.g3200.t1	Bm3947	T20B12.2	M51300426
EFV60336	Acey_s0002.g1068.t1	Bm2425	C27B7.1b	M51311943
EFV60342	Acey_s0156.g3101.t1	Bm4808	K04G2.1	M51307035
EFV60344	Acey_s0004.g2063.t1	Bm3108	D2096.1a	M51309689
EFV60363	Acey_s0066.g3764.t1	Bm7493	ZK546.13	M51304359
EFV60367	Acey_s0059.g2994.t1	Bm3333	F13B12.6	M51313060
EFV60368	Acey_s0004.g1966.t2	Bm6156	W03D2.4	M51313059
EFV60369	Acey_s0266.g695.t1	Bm4757a	Y102E9.2a	M51310030
EFV60379	Acey_s0465.g1946.t2	Bm8641	R151.10	M51304260
EFV60381	Acey_s0004.g2064.t1	Bm3107	E04A4.4c	M51304259
EFV60386	Acey_s0004.g1894.t1	Bm8353	Y113G7A.3	M51307467
EFV60393	Acey_s0438.g1463.t4	Bm3854	F35H12.1	M51303227
EFV60396	Acey_s0012.g1891.t1	Bm6964	Y64G10A.6	M51307020
EFV60398	Acey_s0004.g2071.t1	Bm5441	R166.3	M51300130
EFV60399	Acey_s0041.g446.t1	Bm3095a	E02H1.2	M51300132
EFV60416	Acey_s0271.g886.t1	Bm4254	F52C12.5	M51306863
EFV60423	Acey_s0008.g312.t1	Bm3435	F18C12.3	M51309087
EFV60431	Acey_s0046.g1332.t1	Bm6515	Y41D4A.8a	M51301012
EFV60443	Acey_s0128.g1433.t2	Bm4625	H06H21.6	M51304294
EFV60445	Acey_s0150.g2769.t1	Bm5877	T21B6.1	M51309200
EFV60448	Acey_s0345.g3098.t1	Bm14069	ZC116.2	M51307397
EFV60451	Acey_s0010.g915.t1	Bm5926b	T22D1.9	M51301844
EFV60460	Acey_s0460.g1864.t2	Bm13654	W09H1.5	M51304024
EFV60461	Acey_s0266.g697.t1	Bm3450	F19F10.9	M51305987
EFV60478	Acey_s0022.g607.t1	Bm2691	C41C4.7a	M51308558
EFV60479	Acey_s0154.g2999.t1	Bm7277c	Y110A7A.4	M51300351
EFV60480	Acey_s0004.g2191.t1	Bm10177c	F29C4.1b	M51303434
EFV60482	Acey_s0196.g1515.t1	Bm14791	Y56A3A.13	M51311551
EFV60485	Acey_s0091.g2421.t1	Bm5905	R06F6.4	M51301809
EFV60507	Acey_s0032.g2608.t4	Bm4661	ZK783.4	M51302870
EFV60512	Acey_s0100.g3280.t2	Bm7565	F59D6.7	M51313443
EFV60513	Acey_s0611.g636.t2	Bm6348	T15H9.6	M51311566
EFV60530	Acey_s0545.g3242.t1	Bm13670e	T20F5.2	M51300194
EFV60532	Acey_s0346.g3131.t1	Bm3408	F16D3.4	M51300265
EFV60533	Acey_s0460.g1870.t2	Bm7658a	C35B8.1	M51307465
EFV60534	Acey_s0007.g3465.t4	Bm7601	ZK973.10	M51305270
EFV60540	Acey_s0003.g1253.t2	Bm7395	ZC477.3c	M51304244
EFV60546	Acey_s0050.g1892.t6	Bm14021b	C34E10.10	M51307671
EFV60555	Acey_s0172.g358.t1	Bm13926	F10G7.1	M51309629
EFV60563	Acey_s0254.g287.t1	Bm2290	W06H8.8b	M51302864
EFV60567	Acey_s0141.g2217.t3	Bm8603	M03C11.1	M51313805
EFV60579	Acey_s0030.g2098.t1	Bm3581b	F25H2.1	M51310114
EFV60580	Acey_s0122.g1042.t1	Bm6987	Y66H1A.2a	M51308249
EFV60583	Acey_s0050.g1940.t1	Bm6947	Y61A9LA.10	M51313066
EFV60586	Acey_s0034.g2894.t1	Bm6464	Y39B6A.14	M51301819
EFV60589	Acey_s0018.g3532.t1	Bm5098	M04G12.1b	M51308499
EFV60590	Acey_s0020.g39.t1	Bm3769	F32D8.15	M51308490
EFV60591	Acey_s0024.g1003.t1	Bm2945	T02D1.5	M51308475
EFV60595	Acey_s0760.g2119.t1	Bm13788	F02E8.3	M51308049
EFV60598	Acey_s0025.g1215.t1	Bm6436b	Y38F2AR.5b	M51303887
EFV60600	Acey_s0037.g3445.t3	Bm5439	R160.7	M51308534
EFV60602	Acey_s0012.g1628.t1	Bm7739	T11B7.3a	M51306032
EFV60604	Acey_s0503.g2641.t1	Bm2400c	C44B7.3	M51312846
EFV60606	Acey_s0043.g770.t1	Bm2850	C49H3.6a	M51309109
EFV60607	Acey_s0005.g2451.t2	Bm13753	F49C12.8	M51309110
EFV60619	Acey_s0018.g3643.t1	Bm3870	F36D4.5a	M51306722
EFV60621	Acey_s0211.g2173.t1	Bm3666a	F16H9.1a	M51306723
EFV60623	Acey_s0005.g2467.t3	Bm5503	T03D8.3	M51306710
EFV60629	Acey_s0814.g2491.t1	Bm4350	F54C9.5	M51310361
EFV60635	Acey_s0184.g1001.t1	Bm6897b	Y57E12AL.1a	M51303838
EFV60636	Acey_s0533.g3057.t3	Bm3533	F23B2.5c	M51311117
EFV60637	Acey_s0304.g1935.t2	Bm2617a	C35D10.5	M51305983
EFV60638	Acey_s0115.g527.t3	Bm4944c	K09A9.6c	M51305982
EFV60641	Acey_s0128.g1453.t1	Bm7010	Y67H2A.7a	M51305977
EFV60646	Acey_s0078.g1216.t2	Bm14007b	Y106G6H.3c	M51307626
EFV60649	Acey_s1519.g3909.t1	Bm4590	F59C12.3	M51312280
EFV60653	Acey_s0006.g2949.t1	Bm3166	Y73F8A.35a	M51312657
EFV60654	Acey_s0330.g2702.t2	Bm5843	C06G1.1a	M51311886
EFV60666	Acey_s0984.g3286.t3	Bm4643	H13N06.5	M51307657
EFV60684	Acey_s0063.g3417.t1	Bm4262	F52E1.13d	M51303864
EFV60694	Acey_s0150.g2773.t2	Bm4958	ZK637.1	M51310039
EFV60698	Acey_s0016.g3163.t1	Bm5316d	C34B2.5	M51300264
EFV60704	Acey_s0254.g303.t4	Bm3843	T20B3.7	M51311518
EFV60705	Acey_s0059.g3017.t1	Bm4948	K09B11.9a	M51311520
EFV60718	Acey_s0093.g2611.t5	Bm5451	T01B6.1	M51301764
EFV60724	Acey_s0238.g3290.t1	Bm10089a	C18D1.1	M51310404
EFV60741	Acey_s0413.g998.t4	Bm12413	T05H4.14	M51300129
EFV60743	Acey_s0243.g3493.t2	Bm2023	C06G3.5b	M51310399
EFV60744	Acey_s0287.g1442.t1	Bm2451i	C28G1.3	M51310401
EFV60745	Acey_s0013.g2137.t3	Bm9536	C54H2.3	M51310403
EFV60750	Acey_s0445.g1582.t1	Bm367	R01B10.1a	M51301848
EFV60751	Acey_s0304.g1917.t4	Bm9558e	C12D8.1a	M51303252
EFV60755	Acey_s0003.g1394.t1	Bm4106	F45E6.3	M51301334
EFV60764	Acey_s0120.g913.t2	Bm7899	B0395.1	M51309549
EFV60765	Acey_s0132.g1738.t1	Bm9882	F11A10.3a	M51305692
EFV60769	Acey_s0029.g1958.t4	Bm5771	T13F2.8a	M51304724
EFV60775	Acey_s0010.g1182.t1	Bm1787	T15B7.1	M51307040
EFV60786	Acey_s0068.g275.t1	Bm2932	C54E4.2b	M51310468
EFV60796	Acey_s0005.g2327.t2	Bm13896	F40F11.1	M51301852
EFV60806	Acey_s0499.g2556.t1	Bm5305	K08E3.10	M51310460
EFV60808	Acey_s0030.g2021.t1	Bm7548c	F22E12.4c	M51301864
EFV60812	Acey_s0028.g1819.t1	Bm4272	F52G3.1	M51313619
EFV60821	Acey_s0007.g3461.t1	Bm7264c	Y106G6H.7	M51310331
EFV60822	Acey_s0866.g2767.t1	Bm4970	C01F6.9a	M51307426
EFV60834	Acey_s0484.g2306.t1	Bm7096	Y73B6BL.18b	M51304704
EFV60835	Acey_s0018.g3492.t1	Bm13863	Y75B8A.14	M51304703
EFV60852	Acey_s0097.g3016.t4	Bm11062	Y39B6A.39a	M51308561
EFV60857	Acey_s0036.g3198.t1	Bm3031	ZK632.12	M51310394
EFV60859	Acey_s0038.g3647.t4	Bm1982	T23F4.4	M51301898
EFV60868	Acey_s0011.g1590.t1	Bm3347	F13E9.11b	M51310382
EFV60873	Acey_s0317.g2308.t3	Bm5257	R06F6.8a	M51312662
EFV60876	Acey_s0053.g2316.t1	Bm3022	D1081.2	M51312660
EFV60883	Acey_s0538.g3127.t1	Bm2722	Y39A1A.12	M51304299
EFV60884	Acey_s0386.g431.t2	Bm4681b	H27A22.1a	M51309789
EFV60896	Acey_s0095.g2798.t1	Bm7503	ZK622.4	M51300465
EFV60905	Acey_s0136.g1975.t1	Bm3244c	T05C3.6a	M51304796
EFV60907	Acey_s0675.g1421.t1	Bm6028	T26E3.3a	M51301829
EFV60908	Acey_s0365.g3602.t1	Bm7310	Y116A8C.16c	M51301828
EFV60919	Acey_s0086.g1950.t1	Bm12321	ZC168.2	M51303352
EFV60920	Acey_s0587.g345.t6	Bm10788	F43C1.1	M51310710
EFV60927	Acey_s0210.g2128.t1	Bm11130	K01H12.1b	M51309119
EFV60948	Acey_s0286.g1401.t2	Bm12327	E01A2.5	M51306601
EFV60957	Acey_s0093.g2664.t2	Bm6527	ZK688.9	M51309019
EFV60961	Acey_s0875.g2812.t3	Bm2534	C33D9.1d	M51309734
EFV60966	Acey_s0197.g1549.t3	Bm2886	F32A7.6	M51305148
EFV60967	Acey_s0051.g2092.t2	Bm4307	F53F4.4d	M51314154
EFV60969	Acey_s0203.g1826.t5	Bm2513	ZK632.2	M51301578
EFV60977	Acey_s0372.g144.t1	Bm6562a	T07A9.14	M51300735
EFV60978	Acey_s0167.g115.t3	Bm2140	C10G6.1b	M51300183
EFV60982	Acey_s0043.g796.t2	Bm2708	C42C1.14	M51311262
EFV60983	Acey_s0003.g1155.t1	Bm7542	ZK742.1a	M51300168
EFV60985	Acey_s0267.g765.t1	Bm2985	C56G2.7	M51312259
EFV60986	Acey_s0013.g2055.t1	Bm4649	H14E04.5	M51310349
EFV60987	Acey_s0455.g1760.t1	Bm9531	D1005.2	M51309679
EFV60993	Acey_s0393.g609.t3	Bm6098	R186.4	M51308057
EFV60994	Acey_s0112.g301.t1	Bm2141	Y69H2.10a	M51303121
EFV60997	Acey_s0010.g1167.t3	Bm5004a	Y39B6A.3b	M51306713
EFV61003	Acey_s0509.g2719.t1	Bm9637	Y54G2A.76	M51310136
EFV61015	Acey_s0125.g1298.t2	Bm5018f	F39F10.3	M51312635
EFV61023	Acey_s0026.g1401.t1	Bm6665	B0273.3	M51308921
EFV61029	Acey_s0339.g2951.t1	Bm3177c	ZK757.2	M51313963
EFV61043	Acey_s0004.g1899.t2	Bm780	M7.2b	M51308383
EFV61046	Acey_s0096.g2910.t1	Bm6803	F55A11.3	M51308143
EFV61050	Acey_s0068.g268.t4	Bm7495	ZK546.15	M51301645
EFV61054	Acey_s0494.g2455.t1	Bm4353c	F54C9.9	M51306052
EFV61063	Acey_s0038.g3542.t1	Bm3558	Y34B4A.4a	M51301765
EFV61117	Acey_s0028.g1774.t1	Bm3995c	F41E6.4c	M51300079
EFV61123	Acey_s0056.g2716.t1	Bm2587b	W01F3.3a	M51305213
EFV61126	Acey_s0003.g1185.t1	Bm13838a	C37H5.6b	M51310340
EFV61132	Acey_s0641.g1022.t1	Bm6281	C33C12.3b	M51306649
EFV61137	Acey_s0115.g524.t5	Bm2224	C15H9.4	M51300106
EFV61142	Acey_s0340.g2994.t1	Bm4207b	T12A7.3	M51313623
EFV61143	Acey_s0072.g677.t1	Bm4395	F55A4.10	M51300069
EFV61150	Acey_s0122.g1072.t1	Bm13718	T22F3.4	M51307672
EFV61151	Acey_s0008.g181.t1	Bm5750	C27A12.7a	M51301760
EFV61158	Acey_s0271.g887.t1	Bm5114i	M18.5	M51314099
EFV61159	Acey_s0235.g3189.t4	Bm5054	M01F1.6	M51312394
EFV61162	Acey_s0092.g2608.t2	Bm4389	C17E4.3	M51304059
EFV61163	Acey_s0059.g3056.t3	Bm13992a	R07H5.8	M51304773
EFV61170	Acey_s0377.g265.t1	Bm2076b	F09E8.2b	M51309678
EFV61183	Acey_s0023.g822.t2	Bm2038	Y66D12A.12	M51305280
EFV61186	Acey_s0316.g2279.t3	Bm1705b	F42G8.3d	M51306869
EFV61190	Acey_s0132.g1732.t2	Bm6918c	Y69H2.12	M51308530
EFV61199	Acey_s0097.g3018.t3	Bm6218a	W06H8.1e	M51307584
EFV61204	Acey_s0012.g1791.t1	Bm7114	F23H12.5	M51303285
EFV61214	Acey_s0394.g634.t3	Bm2149	C11D2.7	M51306669
EFV61222	Acey_s0212.g2249.t1	Bm6269a	W10C8.2	M51313700
EFV61230	Acey_s0473.g2082.t5	Bm6748d	Y53C12A.3	M51313933
EFV61231	Acey_s0045.g1120.t1	Bm11145	F13G3.5b	M51301747
EFV61233	Acey_s0081.g1462.t1	Bm6996	Y67D2.1b	M51311014
EFV61234	Acey_s0164.g3543.t8	Bm13848	Y57G11C.10b	M51301749
EFV61239	Acey_s0011.g1285.t1	Bm3963a	T22G5.2	M51304333
EFV61241	Acey_s0163.g3479.t1	Bm2218	C15C8.2b	M51304330
EFV61244	Acey_s0083.g1687.t6	Bm5936	T22H9.2a	M51310365
EFV61250	Acey_s0345.g3124.t4	Bm11948	W03B1.4b	M51313063
EFV61255	Acey_s0018.g3531.t1	Bm5474	T01D3.5	M51303241
EFV61256	Acey_s0189.g1192.t4	Bm6599	H23L24.2	M51309391
EFV61270	Acey_s0069.g308.t2	Bm2074	F57C2.5a	M51307435
EFV61282	Acey_s0129.g1494.t1	Bm5606	T06A1.4	M51306735
EFV61287	Acey_s0226.g2784.t1	Bm6255	W09D10.3	M51306727
EFV61296	Acey_s0001.g67.t4	Bm7627b	ZK1127.5	M51313799
EFV61303	Acey_s0026.g1452.t1	Bm3391d	K10B3.10a	M51310304
EFV61343	Acey_s0275.g1072.t2	Bm326	C06G3.7a	M51301457
EFV61346	Acey_s0063.g3464.t4	Bm8361a	D1046.1a	M51300208
EFV61362	Acey_s0003.g1351.t1	Bm2330	C52B9.2a	M51305633
EFV61371	Acey_s0014.g2224.t2	Bm2740	C26D10.5a	M51312847
EFV61375	Acey_s0230.g2943.t1	Bm6851b	F58D5.1a	M51304783
EFV61385	Acey_s0020.g25.t1	Bm3241	F09G2.2	M51306606
EFV61392	Acey_s0243.g3484.t1	Bm13736	F01G10.1	M51308991
EFV61394	Acey_s0054.g2511.t5	Bm7091	Y71H10B.1b	M51304922
EFV61397	Acey_s0521.g2873.t3	Bm6738	F20D6.8	M51306247
EFV61400	Acey_s0232.g3024.t3	Bm5088e	F48E3.8b	M51309741
EFV61401	Acey_s0295.g1668.t1	Bm13975	Y37E11AL.7a	M51309740
EFV61402	Acey_s0111.g252.t4	Bm5829b	T19A6.2c	M51301535
EFV61416	Acey_s0481.g2245.t1	Bm6453	Y67D8C.5d	M51309609
EFV61417	Acey_s0307.g2016.t1	Bm4314	F53F8.5	M51312384
EFV61421	Acey_s0100.g3264.t4	Bm2947	C54H2.5	M51301874
EFV61427	Acey_s0213.g2273.t1	Bm6698	C09H10.3	M51310333
EFV61430	Acey_s0004.g1792.t2	Bm551	C54C8.4	M51301743
EFV61442	Acey_s0020.g185.t1	Bm4815	F38B6.6	M51300110
EFV61445	Acey_s0035.g3143.t1	Bm6127	W02B12.10	M51310147
EFV61446	Acey_s0039.g101.t2	Bm3076c	DY3.7	M51311890
EFV61454	Acey_s0032.g2528.t1	Bm1932	T23G7.5a	M51306543
EFV61456	Acey_s0186.g1084.t1	Bm5930a	C02C6.3b	M51306557
EFV61472	Acey_s0127.g1368.t1	Bm5805c	F48D6.3	M51301461
EFV61474	Acey_s0111.g238.t6	Bm5410	K07F5.16a	M51300881
EFV61476	Acey_s0149.g2706.t1	Bm4361	F54D5.11	M51309758
EFV61480	Acey_s0073.g800.t3	Bm6083	F41G3.12	M51302748
EFV61483	Acey_s0302.g1873.t1	Bm13743	B0035.5	M51311595
EFV61493	Acey_s0297.g1741.t1	Bm2881	C50F7.6a	M51307438
EFV61530	Acey_s0230.g2963.t1	Bm3918	F38E9.5	M51310291
EFV61541	Acey_s0042.g533.t1	Bm1892	C01G10.8	M51309243
EFV61552	Acey_s0137.g2037.t1	Bm10802	F42G8.12	M51308190
EFV61555	Acey_s0203.g1831.t3	Bm3365	C44C10.3	M51313763
EFV61556	Acey_s0102.g3456.t1	Bm9944c	Y66D12A.13	M51308842
EFV61558	Acey_s0195.g1475.t1	Bm5269j	R07B7.11	M51311138
EFV61560	Acey_s0208.g2074.t1	Bm3231	F01G4.2a	M51312387
EFV61566	Acey_s0024.g890.t1	Bm13825g	F07A11.2a	M51313493
EFV61579	Acey_s0044.g1083.t1	Bm2814	C47E8.4a	M51300173
EFV61580	Acey_s0005.g2457.t1	Bm4220	F49C12.13	M51310135
EFV61581	Acey_s0054.g2521.t1	Bm5824	T18H9.7a	M51311548
EFV61591	Acey_s0128.g1465.t1	Bm4999b	K11C4.5d	M51311549
EFV61632	Acey_s0005.g2320.t1	Bm7239	Y105E8A.19	M51300606
EFV61637	Acey_s0011.g1353.t1	Bm6394	Y37E3.3	M51303660
EFV61654	Acey_s0003.g1509.t5	Bm6841	Y55B1BM.1a	M51311782
EFV61657	Acey_s0017.g3410.t5	Bm3328	F13B9.6	M51311361
EFV61659	Acey_s0564.g3533.t1	Bm4043	F42H10.7a	M51304938
EFV61660	Acey_s0046.g1333.t8	Bm13994	C05C8.2	M51313525
EFV61671	Acey_s0005.g2367.t2	Bm6161	W03F8.1	M51305582
EFV61691	Acey_s0131.g1622.t1	Bm13889c	F46C5.8	M51303799
EFV61696	Acey_s0045.g1128.t4	Bm6800c	Y54E10BR.1a	M51300901
EFV61706	Acey_s0120.g897.t1	Bm4239	F13D12.7b	M51310133
EFV61715	Acey_s0229.g2913.t1	Bm2576a	C34D10.2a	M51301320
EFV61716	Acey_s0397.g698.t1	Bm13897	DY3.1	M51313071
EFV61745	Acey_s0003.g1530.t2	Bm11035	F08F8.4	M51300128
EFV61766	Acey_s0361.g3482.t1	Bm11323	F53A2.4	M51310619
EFV61824	Acey_s0003.g1239.t2	Bm5282a	R07E5.10b	M51306306
EFV61832	Acey_s0061.g3277.t5	Bm2293	C18B12.2	M51303089
EFV61856	Acey_s0008.g232.t1	Bm6972	Y65B4A.8	M51304188
EFV61866	Acey_s0253.g262.t2	Bm3236	F09F7.3	M51312515
EFV61876	Acey_s0098.g3113.t4	Bm2808	R03G5.1c	M51313280
EFV61877	Acey_s0008.g347.t1	Bm5764	T13C2.4	M51313844
EFV61879	Acey_s0189.g1180.t2	Bm14020	W09C5.1	M51311104
EFV61885	Acey_s0140.g2185.t1	Bm5339	Y71H2B.10a	M51301372
EFV61892	Acey_s0012.g1766.t2	Bm7638	ZK1128.8b	M51308839
EFV61909	Acey_s0471.g2052.t3	Bm5586	T05E11.5	M51308838
EFV61962	Acey_s0306.g1975.t3	Bm7073	Y71H2AM.11	M51305361
EFV61969	Acey_s0271.g884.t1	Bm12580	C32F10.1b	M51300404
EFV61978	Acey_s0151.g2819.t4	Bm7464	W06B11.4a	M51301463
EFV61980	Acey_s0148.g2629.t1	Bm2295	C18B12.6	M51301602
EFV61981	Acey_s0142.g2304.t4	Bm5193b	R03E9.1	M51301604
EFV61984	Acey_s0472.g2070.t1	Bm2196b	ZK1128.7	M51303778
EFV61991	Acey_s0054.g2483.t3	Bm135	K07A12.2	M51313800
EFV61996	Acey_s0259.g495.t2	Bm2771	C44H4.4	M51301476
EFV61997	Acey_s0019.g3770.t2	Bm2167b	C13B9.3	M51301477
EFV61998	Acey_s0069.g378.t1	Bm4759	F44E7.2	M51310017
EFV62002	Acey_s0359.g3417.t1	Bm6456b	Y39A3CL.2	M51302879
EFV62005	Acey_s0017.g3418.t1	Bm6795	Y54E10A.7	M51307151
EFV62007	Acey_s0754.g2058.t1	Bm5177c	R02D3.3a	M51301327
EFV62008	Acey_s0183.g938.t4	Bm6268c	W10C6.1	M51304887
EFV62013	Acey_s0012.g1832.t4	Bm2829	C48B6.3	M51301325
EFV62058	Acey_s0070.g498.t1	Bm1788	B0395.2	M51306784
EFV62060	Acey_s0151.g2829.t1	Bm8216	K06A4.3	M51305326
EFV62081	Acey_s0664.g1314.t1	Bm5301	R08D7.1	M51301621
EFV62093	Acey_s0010.g973.t1	Bm9475	C27A7.3b	M51303473
EFV62096	Acey_s0026.g1380.t1	Bm13957	C08B11.8	M51300337
EFV62101	Acey_s0020.g227.t3	Bm1775a	Y71H2AM.16	M51310347
EFV62112	Acey_s0015.g2523.t1	Bm6502	Y40B1B.8	M51303638
EFV62114	Acey_s0243.g3461.t1	Bm2820	C47E12.7	M51305622
EFV62126	Acey_s0056.g2706.t1	Bm4626	Y49E10.11c	M51307617
EFV62135	Acey_s0409.g932.t1	Bm14023	M106.5	M51311106
EFV62137	Acey_s0053.g2423.t1	Bm7203	Y95B8A.8	M51304270
EFV62145	Acey_s0037.g3486.t1	Bm3205b	F08F8.8	M51305490
EFV62150	Acey_s0371.g131.t2	Bm2250	C16C10.5	M51310170
EFV62151	Acey_s0014.g2444.t2	Bm13748	Y48B6A.1	M51312784
EFV62152	Acey_s0002.g665.t1	Bm6093a	W01A8.4	M51306947
EFV62153	Acey_s0078.g1162.t1	Bm5332a	T01H3.1	M51301373
EFV62157	Acey_s0961.g3226.t2	Bm14061b	C53H9.1	M51308175
EFV62160	Acey_s0421.g1176.t4	Bm11550	C13C4.5	M51313122
EFV62172	Acey_s0131.g1647.t8	Bm5632	T07A9.8	M51306307
EFV62174	Acey_s0061.g3295.t1	Bm12122	C16A3.8	M51306296
EFV62200	Acey_s0333.g2797.t1	Bm3895	F37C12.11	M51301563
EFV62202	Acey_s0094.g2730.t4	Bm3330d	F13B10.1h	M51307969
EFV62206	Acey_s0096.g2936.t2	Bm3616f	F26E4.1	M51303141
EFV62220	Acey_s0766.g2177.t1	Bm6643	T20B12.8	M51301348
EFV62228	Acey_s0074.g856.t1	Bm3261a	F10C5.1	M51305732
EFV62236	Acey_s0001.g394.t1	Bm7516	ZK643.2	M51306562
EFV62240	Acey_s0028.g1791.t5	Bm4274	F52H2.7	M51305771
EFV62242	Acey_s0008.g112.t1	Bm3323	BE0003N10.2	M51301484
EFV62244	Acey_s0014.g2433.t2	Bm5421	R144.5	M51301432
EFV62248	Acey_s0843.g2641.t3	Bm13812b	Y66D12A.15	M51301431
EFV62261	Acey_s0243.g3499.t1	Bm6632d	Y48A5A.1	M51303775
EFV62263	Acey_s0016.g2906.t1	Bm2983	C56G2.1a	M51301613
EFV62271	Acey_s0041.g454.t1	Bm4465	F56C9.10b	M51301440
EFV62272	Acey_s0011.g1564.t2	Bm5312	R09B3.5	M51306843
EFV62273	Acey_s0724.g1849.t1	Bm5628e	T07A5.6a	M51301441
EFV62277	Acey_s0103.g3550.t2	Bm4399b	F56A8.7a	M51301443
EFV62278	Acey_s0036.g3195.t1	Bm6660	Y48E1C.2	M51306163
EFV62288	Acey_s0021.g265.t2	Bm3066	D2096.4a	M51303122
EFV62291	Acey_s0224.g2734.t4	Bm3168b	T11F9.4b	M51308069
EFV62296	Acey_s0147.g2599.t1	Bm12253	C35A5.8	M51303032
EFV62300	Acey_s0656.g1238.t1	Bm13875	W03F9.5	M51305758
EFV62314	Acey_s0664.g1316.t1	Bm3019	D1054.14	M51309618
EFV62321	Acey_s0004.g2203.t5	Bm3564c	F52C6.3	M51304253
EFV62339	Acey_s0978.g3274.t3	Bm2430	Y52E8A.4a	M51312954
EFV62362	Acey_s0069.g343.t1	Bm2223a	F42F12.3	M51301540
EFV62363	Acey_s0012.g1799.t1	Bm3809g	F33H2.5	M51312640
EFV62386	Acey_s0190.g1254.t1	Bm3451b	F19F10.12	M51303262
EFV62393	Acey_s0048.g1549.t1	Bm7422	K12H4.7a	M51307793
EFV62406	Acey_s0040.g295.t2	Bm4291	Y111B2A.10b	M51305011
EFV62409	Acey_s0057.g2779.t4	Bm6446	C54F6.4	M51306276
EFV62419	Acey_s0092.g2551.t1	Bm3211	C54C8.7	M51300319
EFV62441	Acey_s0159.g3265.t3	Bm11413	Y43F4B.5a	M51304935
EFV62444	Acey_s0255.g326.t3	Bm3285	F10G7.10b	M51300627
EFV62453	Acey_s0140.g2193.t7	Bm2107	C09G4.3	M51301369
EFV62456	Acey_s0017.g3200.t1	Bm2070b	R13A5.5	M51301351
EFV62503	Acey_s0571.g120.t1	Bm9180	F55G1.11	M51313336
EFV62515	Acey_s0359.g3422.t1	Bm1771	B0361.2a	M51305854
EFV62518	Acey_s0027.g1598.t1	Bm3428b	F18A1.5	M51307805
EFV62526	Acey_s0098.g3141.t1	Bm6447	Y39A1A.9	M51311982
EFV62529	Acey_s0134.g1861.t1	Bm7164	Y82E9BR.3	M51312075
EFV62537	Acey_s0259.g484.t2	Bm1754	B0334.4	M51305092
EFV62542	Acey_s0113.g380.t4	Bm6985	Y66D12A.23	M51300436
EFV62552	Acey_s0266.g700.t2	Bm4768	K02F3.11	M51300534
