# Supplementary material for: Comparative Genomic Analysis of Trichinella spiralis Reveals Potential Mechanisms of Adaptive Evolution
Source: Biomed Res Int. 2019 May 21;2019:2948973. doi: 10.1155/2019/2948973 (PMC6556364; doi:10.1155/2019/2948973)
Supplement: Supplementary Materials — 2. Nucleotide sequences with more than 30% identity were selected and a total of 1997 orthologs were obtained (See Supplementary Dataset 1). Orthologs genes of five nematodes (A. ceylanicum, B. malayi, C. elegans, T. spiralis, and T. suis) for positive selection were identified. The data has been deposited in the orthologs genes of five nematodes (A. ceylanicum, B. malayi, C. elegans, T. spiralis, and T. suis) for positive selection repository. See Supplementary Dataset 1. 3. By using CODEML program to infer a dN/dS ratio for each pair of sequences, 986 genes were selected (p-value<0.01) (Supplementary Dataset 2). The data has been deposited in the positive selection genes of T. spiralis by comparing with four related nematodes. See Supplementary Dataset 2. 4. PSGs were grouped into the GO categories of biological processes, cellular components, and molecular functions (Supplementary Dataset 3). The data has been deposited in the GO analysis of PSGs in Trichinella spiralis by comparing with other four related nematodes. See Supplementary Dataset 3. 5. Gene Ontology (GO) term analysis for the positively selected genes of T. spiralis with four related nematodes (Figure 1). The figure has been deposited in the Gene Ontology (GO) term analysis for the positively selected genes of T. spiralis. See Figure 1 (included in the manuscript). 6. Molecular interaction and reaction networks of identified PSGs products were analyzed through KEGG pathway maps, which revealed that some PSGs could be ascribed to specific pathways, including metabolic pathways, the mRNA surveillance pathway, pentose phosphate pathway, amino sugar and nucleotide sugar, synthesis pathways, endocytosis, nucleotide excision repair, calcium signaling pathway, purine metabolism, inositol phosphate metabolism, and the phosphatidylinositol signaling system (Figure 2; Supplementary Dataset 4). The data has been deposited in the Pathway Information of Kyoto Encyclopedia of Genes and Genomes (KEGG) of positively [file 2948973.f1.zip › supplementary files/Supplementary dateset 3 GO analysis of PSGs in Trichinella spiralis by comparing with other four related nematodes.xlsx]

## Sheet: wego analysis sequence
GO analysis of 986 positively selected genes of T. spiralis
EFV46914
EFV47329
EFV48950	GO:0016020
EFV49322	GO:0007186	GO:0004930	GO:0016020
EFV50268	GO:0006468	GO:0004672	GO:0005524
EFV50422	GO:0016020
EFV51950
EFV51845
EFV51487
EFV51368
EFV51851	GO:0007166	GO:0007186	GO:0004888	GO:0004930	GO:0016020	GO:0016021
EFV51964	GO:0006412	GO:0003735	GO:0015934
EFV52161
EFV52405	GO:0006810	GO:0006886	GO:0015031	GO:0071806	GO:0015450	GO:0005739	GO:0005743	GO:0016020
EFV52412
EFV52757
EFV52599	GO:0016020
EFV52803
EFV52919	GO:0019904	GO:0016020	GO:0016021
EFV52920	GO:0003677	GO:0008270	GO:0046872
EFV53011
EFV53039
EFV53488	GO:0016020
EFV53546	GO:0016020
EFV53713
EFV53947
EFV54106
EFV52245	GO:0000398	GO:0005681	GO:0016020	GO:0016021
EFV54136
EFV54250	GO:0007155	GO:0007266	GO:0051015	GO:0005622
EFV54265
EFV54462	GO:0006479	GO:0032259	GO:0008168	GO:0016740
EFV54618	GO:0016020
EFV54752	GO:0000166	GO:0005634
EFV54785
EFV54863
EFV55058	GO:0010466	GO:0030414	GO:0005576
EFV55280
EFV55962	GO:0016020
EFV56156	GO:0006937	GO:0005861
EFV56325
EFV56454	GO:0016020
EFV56797	GO:0006412	GO:0003735	GO:0005761
EFV56867	GO:0007218
EFV56908	GO:0008152	GO:0003824	GO:0016020	GO:0016021
EFV56915
EFV57040
EFV57109	GO:0005515
EFV57379
EFV57402
EFV57562	GO:0016020	GO:0016021
EFV57606	GO:0000166	GO:0016020	GO:0016021
EFV57653
EFV53824	GO:0016020
EFV54372	GO:0016055	GO:0030178	GO:0008013
EFV55455
EFV57072	GO:0006412	GO:0003735	GO:0005739	GO:0005840
EFV57481	GO:0016020
EFV57916
EFV57981
EFV57986
EFV58554
EFV58637
EFV59121
EFV59373
EFV59413	GO:0016020	GO:0016021
EFV59697	GO:0016020
EFV59726	GO:0046872
EFV59727	GO:0000166	GO:0003676	GO:0003723	GO:0046872	GO:0005634
EFV60047	GO:0016020
EFV60393
EFV59547	GO:0042073	GO:0044782	GO:0042073	GO:0005929
EFV60181	GO:0000266	GO:0016020	GO:0016021
EFV60580	GO:0017056	GO:0005643
EFV60604
EFV60606
EFV60649
EFV60653	GO:0008152	GO:0003824	GO:0016020	GO:0016021
EFV60822
EFV60852
EFV60948	GO:0016020
EFV60967
EFV62174
EFV62244	GO:0016020
EFV62339	GO:0016020
EFV62515	GO:0008152	GO:0003824
EFV62526
EFV48078	GO:0003723
EFV49029
EFV51698
EFV52589	GO:0007268	GO:0019992
EFV57406	GO:0006886	GO:0005622
EFV61581
EFV62013
EFV62453	GO:0007049	GO:0045859	GO:0051301	GO:0016538
EFV57827
EFV53880
EFV54297	GO:0002943	GO:0008033	GO:0055114	GO:0003676	GO:0003824	GO:0016491	GO:0017150	GO:0046872	GO:0050660
EFV60590	GO:0016020
EFV60868	GO:0016020
EFV58393	GO:0016020
EFV58350
EFV56134
EFV62005	GO:0006412	GO:0003735	GO:0005622	GO:0005840
EFV57497	GO:0030150	GO:0005744	GO:0016020	GO:0016021
EFV48290
EFV52898
EFV60129	GO:0016020
EFV61555	GO:0055085	GO:0016020	GO:0016021
EFV50728
EFV56492	GO:0006412	GO:0003735	GO:0005840
EFV56787	GO:0016020	GO:0016021
EFV60718	GO:0005509
EFV61657	GO:0016020
EFV51366	GO:0006810	GO:0006811	GO:0034220	GO:0005230	GO:0016020	GO:0016021
EFV56287	GO:0008152	GO:0016874	GO:0016884	GO:0005739
EFV53939
EFV51739	GO:0008152	GO:0032259	GO:0008168
EFV55726	GO:0016020
EFV58359	GO:0030488	GO:0031515
EFV58367
EFV52813
EFV52895	GO:0000184	GO:0000166	GO:0003677	GO:0004386	GO:0005524	GO:0008270	GO:0005737
EFV54441	GO:0005794
EFV47608	GO:0005515
EFV49768	GO:0005515
EFV53377	GO:0005634
EFV55194	GO:0005515
EFV55242	GO:0005515
EFV59133	GO:0005515
EFV59446	GO:0005515
EFV61417	GO:0005515
EFV46951	GO:0005515
EFV47885	GO:0005515
EFV53612	GO:0006812	GO:0055085	GO:0098655	GO:0008324	GO:0016020	GO:0016021
EFV55553	GO:0016020
EFV59418	GO:0016020
EFV49855	GO:0006468	GO:0016310	GO:0000166	GO:0004672	GO:0004674	GO:0005524	GO:0016301
EFV51149	GO:0006096	GO:0016310	GO:0004618	GO:0016301	GO:0016740	GO:0016020	GO:0016021
EFV52807	GO:0007029	GO:0016310	GO:0016301	GO:0005789	GO:0016020	GO:0016021
EFV52868	GO:0006012	GO:0008152	GO:0016310	GO:0046835	GO:0000166	GO:0004335	GO:0005524	GO:0016301	GO:0016740	GO:0016773	GO:0005737
EFV58395	GO:0016310	GO:0016301
EFV58826	GO:0006468	GO:0016310	GO:0000166	GO:0004672	GO:0005524	GO:0016301
EFV59505	GO:0006468	GO:0016310	GO:0000166	GO:0004672	GO:0005524	GO:0016301
EFV60188	GO:0016310	GO:0016301
EFV60567	GO:0006468	GO:0016310	GO:0000166	GO:0004672	GO:0004674	GO:0005524	GO:0016301	GO:0016740
EFV52829	GO:0016310	GO:0046488	GO:0046854	GO:0016301	GO:0016307
EFV56205	GO:0006468	GO:0016310	GO:0004672	GO:0005524	GO:0016301
EFV58307	GO:0016310	GO:0016301
EFV53682	GO:0006468	GO:0016310	GO:0000166	GO:0004672	GO:0005524	GO:0016301
EFV53631	GO:0006468	GO:0016310	GO:0004672	GO:0005524	GO:0016301
EFV57365	GO:0015937	GO:0016310	GO:0004594	GO:0005524	GO:0016301
EFV57723	GO:0000165	GO:0006468	GO:0016310	GO:0000166	GO:0004672	GO:0004674	GO:0004707	GO:0005524	GO:0016301	GO:0016740	GO:0005622
EFV60977	GO:0006412	GO:0016310	GO:0000166	GO:0003735	GO:0005524	GO:0016301	GO:0005622	GO:0005840
EFV55075	GO:0006412	GO:0016310	GO:0000166	GO:0003735	GO:0005524	GO:0016301	GO:0005622	GO:0005840
EFV53348	GO:0006468	GO:0016310	GO:0018108	GO:0000166	GO:0004672	GO:0004713	GO:0004715	GO:0005524	GO:0016301	GO:0016740
EFV57237	GO:0006464	GO:0018095	GO:0016874
EFV48151	GO:0006281	GO:0006310	GO:0051103	GO:0003677	GO:0003909	GO:0003910	GO:0005524	GO:0016874
EFV52783
EFV52856
EFV57567	GO:0008152	GO:0008270	GO:0016874	GO:0046872	GO:0016020	GO:0016021
EFV51596	GO:0006419	GO:0043039	GO:0000166	GO:0003676	GO:0004813	GO:0005524	GO:0016874	GO:0016876	GO:0005737
EFV55486	GO:0006260	GO:0006281	GO:0006310	GO:0006974	GO:0051103	GO:0071897	GO:0000166	GO:0003677	GO:0003909	GO:0003910	GO:0005524	GO:0016874
EFV57903	GO:0006260	GO:0006281	GO:0006310	GO:0006974	GO:0051103	GO:0071897	GO:0000166	GO:0003677	GO:0003909	GO:0003910	GO:0005524	GO:0016874
EFV55995	GO:0006418	GO:0006424	GO:0043039	GO:0000049	GO:0000166	GO:0004812	GO:0004818	GO:0005524	GO:0016874	GO:0016876	GO:0005737
EFV61162	GO:0008152	GO:0008270	GO:0016874	GO:0016020	GO:0016021
EFV51492	GO:0008152	GO:0016740	GO:0016757	GO:0016020	GO:0016021
EFV49327	GO:0032259	GO:0003676	GO:0008168	GO:0016740
EFV58754	GO:0009058	GO:0009435	GO:0003824	GO:0016740	GO:0016779
EFV57823	GO:0006481	GO:0032259	GO:0004671	GO:0008168	GO:0016740	GO:0005783	GO:0005789	GO:0016020	GO:0016021
EFV50975	GO:0006479	GO:0032259	GO:0008168	GO:0016740
EFV51309	GO:0008152	GO:0008080	GO:0016740
EFV51542	GO:0032259	GO:0003676	GO:0008168	GO:0016740
EFV53614	GO:0008152	GO:0016740
EFV54313	GO:0006479	GO:0032259	GO:0035246	GO:0008168	GO:0009055	GO:0016740	GO:0046872	GO:0051536	GO:0051537
EFV55076	GO:0008152	GO:0008080	GO:0016740
EFV55365	GO:0032259	GO:0008168	GO:0016740
EFV55594	GO:0008033	GO:0032259	GO:0008168	GO:0016740	GO:0016783	GO:0016020	GO:0016021
EFV56114	GO:0006695	GO:0016310	GO:0004631	GO:0016301	GO:0005737
EFV56570	GO:0008033	GO:0030488	GO:0032259	GO:0003723	GO:0004809	GO:0008168	GO:0016740	GO:0016020	GO:0016021
EFV58763	GO:0008033	GO:0030488	GO:0032259	GO:0003723	GO:0004809	GO:0008168	GO:0016740	GO:0016020	GO:0016021
EFV59174	GO:0008152	GO:0008080	GO:0016740
EFV54641	GO:0008152	GO:0008080	GO:0016740
EFV60157	GO:0006415	GO:0009435	GO:0003747	GO:0004514	GO:0016740	GO:0016757
EFV55622	GO:0009058	GO:0000166	GO:0003824	GO:0016740	GO:0016779
EFV56116	GO:0006348	GO:0016568	GO:0016573	GO:0004402	GO:0016740	GO:0005634
EFV62096	GO:0008152	GO:0016740	GO:0016758	GO:0005789
EFV61445	GO:0006400	GO:0008033	GO:0030488	GO:0032259	GO:0036265	GO:0000049	GO:0003723	GO:0008168	GO:0008176	GO:0016740	GO:0005634
EFV58355	GO:0008152	GO:0004659	GO:0016740	GO:0016021
EFV55721	GO:0008152	GO:0016740	GO:0016746	GO:0016747	GO:0016020	GO:0016021
EFV62058	GO:0008152	GO:0008374	GO:0016740	GO:0016746	GO:0016020	GO:0016021
EFV55539	GO:0097056	GO:0003824	GO:0016740	GO:0016785
EFV54807	GO:0008152	GO:0016740
EFV48975	GO:0006810	GO:0006811	GO:0006813	GO:0034220	GO:0055085	GO:0071805	GO:0005216	GO:0005249	GO:0016020	GO:0016021
EFV53956	GO:0006821	GO:0034220	GO:0055085	GO:1903959	GO:0005216	GO:0005247	GO:0016020	GO:0016021
EFV59695	GO:0006810	GO:0006811	GO:0006816	GO:0034765	GO:0055085	GO:0070588	GO:0005216	GO:0005244	GO:0005245	GO:0005262	GO:0005891	GO:0016020	GO:0016021
EFV50617	GO:0030488	GO:0032259	GO:0008168	GO:0016429	GO:0016740	GO:0031515
EFV58549	GO:0000154	GO:0006364	GO:0031167	GO:0032259	GO:0000179	GO:0008168	GO:0008649	GO:0016740
EFV50329	GO:0006508	GO:0003824	GO:0004222	GO:0046872
EFV59307	GO:0006508	GO:0008237	GO:0008270	GO:0016020	GO:0016021
EFV54564	GO:0006508	GO:0006515	GO:0030163	GO:0000166	GO:0004176	GO:0004252	GO:0005524	GO:0008233	GO:0008236	GO:0016787
EFV56842	GO:0006508	GO:0008233	GO:0005634
EFV53966	GO:0006508	GO:0006810	GO:0006914	GO:0015031	GO:0008233	GO:0016787	GO:0005737	GO:0005634
EFV55460	GO:0006508	GO:0070084	GO:0004177	GO:0008233	GO:0008235	GO:0016787	GO:0046872	GO:0070006	GO:0005737
EFV57673	GO:0006508	GO:0008233	GO:0008234	GO:0016787
EFV58323	GO:0006508	GO:0008233	GO:0008234	GO:0016787
EFV60084	GO:0006508	GO:0004190	GO:0008233	GO:0016787
EFV60641	GO:0006508	GO:0004190	GO:0008233	GO:0016787
EFV61050	GO:0006508	GO:0004252
EFV52155	GO:0006508	GO:0032259	GO:0004252	GO:0008168	GO:0008233	GO:0008236	GO:0016787
EFV58494	GO:0006465	GO:0006508	GO:0004222	GO:0008233	GO:0008236	GO:0008237	GO:0008270	GO:0016787	GO:0046872	GO:0016020	GO:0016021
EFV53825	GO:0006508	GO:0004190	GO:0016020	GO:0016021
EFV58167	GO:0006508	GO:0008233	GO:0008236	GO:0016787	GO:0005739	GO:0005743	GO:0016020
EFV54343	GO:0006508	GO:0004177	GO:0008237	GO:0008270
EFV61909	GO:0006508	GO:0004190	GO:0016020	GO:0016021
EFV52428	GO:0006511	GO:0051603	GO:0004175	GO:0004298	GO:0005634	GO:0005839	GO:0016020	GO:0016021	GO:0019773
EFV52845	GO:0005581	GO:0016020	GO:0016021
EFV60602	GO:0042302	GO:0005581	GO:0016020	GO:0016021
EFV52694	GO:0003677	GO:0005581	GO:0005634
EFV52706	GO:0005581
EFV52749	GO:0006810	GO:0006811	GO:0006813	GO:0034765	GO:0051260	GO:0055085	GO:0071805	GO:0005216	GO:0005244	GO:0005249	GO:0005267	GO:0008076	GO:0016020	GO:0016021
EFV52901	GO:0006351	GO:0006464	GO:0003899	GO:0004077	GO:0016874	GO:0046983
EFV46349	GO:0005921	GO:0016020
EFV46647	GO:0009168	GO:0032264	GO:0003876	GO:0019239
EFV47048	GO:0003677	GO:0046982	GO:0000786	GO:0005634	GO:0005694
EFV47343	GO:0008152	GO:0016740
EFV47512
EFV47803	GO:0035556	GO:0005622
EFV47834	GO:0006816	GO:0035725	GO:0055085	GO:0005432	GO:0016020	GO:0016021
EFV48146	GO:0003676
EFV48228
EFV48442	GO:0006810	GO:0006811	GO:0015991	GO:0015992	GO:0005524	GO:0016820	GO:0033178
EFV48461	GO:0006412	GO:0003735	GO:0005840	GO:0015934	GO:0030529
EFV48512
EFV48526
EFV48558	GO:0006413	GO:0003676	GO:0003743
EFV48808	GO:0007165	GO:0005509	GO:0005578
EFV48926	GO:0006810	GO:0008152	GO:0000166	GO:0005215	GO:0005524	GO:0016887	GO:0016021
EFV49205
EFV49235	GO:0003676
EFV49296
EFV49402	GO:0006298	GO:0005524	GO:0030983
EFV49415	GO:0005488
EFV49435	GO:0006413	GO:0003743
EFV49477	GO:0042254
EFV49567	GO:0005515
EFV49612	GO:0005576
EFV49637
EFV49642	GO:0005515
EFV49650	GO:0008654	GO:0016740	GO:0016780
EFV49666	GO:0003779	GO:0005509
EFV49690	GO:0009058	GO:0003824	GO:0030170
EFV49715	GO:0015986	GO:0046933	GO:0045261
EFV49737	GO:0005737
EFV49875	GO:0007160	GO:0005509
EFV49905	GO:0005789	GO:0016020	GO:0016021
EFV49924	GO:0006470	GO:0016311	GO:0035335	GO:0004721	GO:0004725	GO:0016787	GO:0016791	GO:0016020	GO:0016021
EFV49955	GO:0006396	GO:0008452
EFV50049	GO:0008152	GO:0016787
EFV50052
EFV50053	GO:0022900	GO:0005739	GO:0005747	GO:0016020	GO:0016021
EFV50066	GO:0055114	GO:0016491	GO:0016020	GO:0016021
EFV50166	GO:0000166	GO:0003676
EFV50200	GO:0008152	GO:0008146	GO:0016740
EFV50242	GO:0005783	GO:0016021
EFV50278	GO:0016021
EFV50305	GO:0000398	GO:0005681
EFV50309	GO:0055114	GO:0003954	GO:0008137	GO:0005739
EFV50315	GO:0006260	GO:0003677
EFV50316	GO:0055114	GO:0004497	GO:0005506	GO:0016491	GO:0016705	GO:0020037	GO:0046872	GO:0016020	GO:0016021
EFV50332
EFV50357	GO:0006631	GO:0008152	GO:0055114	GO:0003824	GO:0003857	GO:0016491
EFV50370	GO:0006413	GO:0003743
EFV50374	GO:0006413	GO:0003743	GO:0005840	GO:0030529
EFV50386	GO:0006351	GO:0006355	GO:0007275	GO:0003677	GO:0046872	GO:0046983	GO:0005634
EFV50459	GO:0005515
EFV50471	GO:0051301	GO:0000166	GO:0005525
EFV50496	GO:0006355
EFV50515	GO:0015031	GO:0042147	GO:0008565	GO:0005622	GO:0030904
EFV50579
EFV50595	GO:0003676	GO:0005634
EFV50642	GO:0008152	GO:0000166	GO:0005524	GO:0016887
EFV50644	GO:0016020	GO:0016021
EFV50651	GO:0008152	GO:0055114	GO:0016491	GO:0046872
EFV50660	GO:0020037	GO:0046872	GO:0016020	GO:0016021
EFV50700	GO:0016020	GO:0016021
EFV50701	GO:0046872
EFV50746	GO:0007264	GO:0043547	GO:0005085	GO:0005622	GO:0016020	GO:0016021
EFV50852	GO:0006412	GO:0006414	GO:0003746	GO:0005853
EFV50886	GO:0005975	GO:0008152	GO:0004553	GO:0004565	GO:0016787	GO:0016798
EFV50920	GO:0016020
EFV50984	GO:0008152	GO:0003824
EFV51123	GO:0006412	GO:0003735	GO:0005622	GO:0005840	GO:0030529
EFV51148	GO:0016020	GO:0016021
EFV51151
EFV51193	GO:0016020	GO:0016021
EFV51202	GO:0008152	GO:0032259	GO:0008168	GO:0016740
EFV51271	GO:0006396	GO:0003723	GO:0016740	GO:0016779	GO:0016020	GO:0016021
EFV51308	GO:1902600	GO:0004129	GO:0016020	GO:0016021
EFV51374	GO:0007155	GO:0003779	GO:0051015
EFV51389	GO:0006355	GO:0003677	GO:0043565	GO:0005634
EFV51418
EFV51437	GO:0008299	GO:0019287	GO:0004163	GO:0016831	GO:0005829
EFV51439	GO:0015876	GO:0016020	GO:0016021
EFV51535	GO:0006457	GO:0006508	GO:0000166	GO:0005524	GO:0008233	GO:0051082
EFV51541	GO:0008270	GO:0046872	GO:0016020	GO:0016021
EFV51544	GO:0043550	GO:0070772
EFV51562	GO:0035091
EFV51563	GO:0006397
EFV51565	GO:0016020
EFV51566	GO:0016020	GO:0016021
EFV51623
EFV51636
EFV51659	GO:0003676	GO:0016020	GO:0016021
EFV51677	GO:0005975	GO:0003824	GO:0004553	GO:0043169
EFV51745	GO:0008152	GO:0055114	GO:0016491
EFV51763	GO:0007165	GO:0007186	GO:0004871	GO:0004930	GO:0005000	GO:0016020	GO:0016021
EFV51773	GO:0006508	GO:0008242	GO:0016020	GO:0016021
EFV51796	GO:0016020
EFV51842	GO:0006817	GO:0055085	GO:0005315	GO:0016020	GO:0016021
EFV51898	GO:0007034	GO:0005622
EFV51914	GO:0008152	GO:0003824
EFV51952	GO:0055114	GO:0003954	GO:0008137	GO:0005739
EFV51955
EFV51962	GO:0008152	GO:0016311	GO:0000287	GO:0008253	GO:0016787	GO:0005737
EFV51984	GO:0005509
EFV51987	GO:0003723
EFV52019	GO:0035023	GO:0043547	GO:0005089
EFV52023	GO:0003677	GO:0003697
EFV52027	GO:0016020
EFV52032	GO:0006468	GO:0018108	GO:0000166	GO:0004672	GO:0004713	GO:0005524	GO:0000502	GO:0016020	GO:0016021
EFV52052	GO:0006355	GO:0003700	GO:0008270	GO:0005634
EFV52061	GO:0005507	GO:0016020	GO:0016021
EFV52066	GO:0035091
EFV52074
EFV52079	GO:0007034	GO:0005622
EFV52084	GO:0006355	GO:0003677	GO:0003700	GO:0043565
EFV52088
EFV52092
EFV52135	GO:0006182	GO:0006468	GO:0009190	GO:0035556	GO:0000166	GO:0004383	GO:0004672	GO:0005524	GO:0016829	GO:0016849	GO:0005622	GO:0016020	GO:0016021
EFV52168	GO:0006030	GO:0008061	GO:0005576
EFV52174	GO:0006355	GO:0003676	GO:0003677
EFV52187	GO:0006084	GO:0003824	GO:0016740
EFV52191	GO:0008152	GO:0016787
EFV52224	GO:0015672	GO:0098655	GO:0005261	GO:0016020	GO:0016021
EFV52253
EFV52292	GO:0005975	GO:0016310	GO:0016301	GO:0016773
EFV52329	GO:0016020
EFV52332	GO:0003676	GO:0005634
EFV52363	GO:0008152	GO:0000287	GO:0003824	GO:0030976	GO:0016020	GO:0016021
EFV52385	GO:0006094	GO:0006096	GO:0006098	GO:0008152	GO:0003824	GO:0004807	GO:0016853
EFV52403	GO:0008152	GO:0003774	GO:0016459
EFV52426
EFV52429	GO:0008152	GO:0015991	GO:0000166	GO:0003676	GO:0004386	GO:0005524	GO:0015078	GO:0016787	GO:0033179
EFV52537
EFV52578	GO:0005515
EFV52580	GO:0048268	GO:0005543	GO:0005545	GO:0030276	GO:0030136
EFV52591	GO:0009451	GO:0043412	GO:0003824	GO:0016740	GO:0051536	GO:0051539
EFV52604	GO:0006355	GO:0006470	GO:0007275	GO:0008152	GO:0035335	GO:0004721	GO:0004725	GO:0016787	GO:0046872
EFV52612	GO:0003676	GO:0046872
EFV52618	GO:0006457	GO:0005524	GO:0000413	GO:0005737
EFV52620	GO:0000413	GO:0006457	GO:0003755	GO:0016853
EFV52650	GO:0000166	GO:0003676
EFV52660	GO:0006355	GO:0008152	GO:0003677	GO:0008270	GO:0042578	GO:0043565	GO:0046872	GO:0005634	GO:0016020	GO:0016021
EFV52663	GO:0008270	GO:0046872	GO:0016020	GO:0016021
EFV52676	GO:0006457	GO:0005509	GO:0051082	GO:0005783
EFV52681
EFV52683	GO:0000166	GO:0003676	GO:0016020	GO:0016021
EFV52702	GO:0006412	GO:0003735	GO:0019843	GO:0005840
EFV52708	GO:0008270	GO:0046872
EFV52719	GO:0016020
EFV52750	GO:0016310	GO:0046939	GO:0004017	GO:0005524	GO:0016301
EFV52755	GO:0005524	GO:0016787
EFV52770
EFV52792	GO:0008152	GO:0008152	GO:0016787	GO:0016884
EFV52814	GO:0008152	GO:0016740	GO:0016757	GO:0016020	GO:0016021
EFV52822	GO:0006096	GO:0000287	GO:0004634	GO:0000015
EFV52831	GO:0055114	GO:0003979	GO:0016491	GO:0016616	GO:0051287
EFV52847	GO:0008152	GO:0003676	GO:0004386	GO:0005524	GO:0016787
EFV52864	GO:0016020	GO:0016021
EFV52876	GO:0070588	GO:0005245	GO:0005891
EFV52879	GO:0007165
EFV52894
EFV52896	GO:0090305	GO:0004519	GO:0004527
EFV52930	GO:0008152	GO:0008376	GO:0016020	GO:0016021	GO:0032580
EFV52936	GO:0006730	GO:0004089	GO:0008270	GO:0046872
EFV52939
EFV52942	GO:0015986	GO:0046933	GO:0046961	GO:0045261
EFV52984
EFV52985	GO:0035556	GO:0005622
EFV53000	GO:0006470	GO:0035335	GO:0004725	GO:0005622
EFV53012	GO:0007275	GO:0016055	GO:0005102	GO:0005576	GO:0005578
EFV53025	GO:0006412	GO:0030001	GO:0055085	GO:0003735	GO:0046873	GO:0005622	GO:0005840	GO:0016020	GO:0016021
EFV53035	GO:0008152	GO:0000166	GO:0005524	GO:0005525	GO:0016787	GO:0043022	GO:0043023	GO:0005737
EFV53038
EFV53075	GO:0016020	GO:0016021
EFV53090	GO:0016310	GO:0008440	GO:0016301
EFV53092	GO:0016020
EFV53122	GO:0003677	GO:0046983	GO:0016020	GO:0016021
EFV53154	GO:0000079	GO:0006355	GO:0019901
EFV53158	GO:0006508	GO:0006750	GO:0006915	GO:0042981	GO:0004197	GO:0004363	GO:0005524	GO:0008233	GO:0008234	GO:0016787	GO:0016874
EFV53177	GO:0006355	GO:0003700	GO:0016020	GO:0016021
EFV53182
EFV53312	GO:0006810	GO:0005622
EFV53314	GO:0006810	GO:0055085	GO:0005215	GO:0016020	GO:0016021
EFV53374	GO:0051726
EFV53375	GO:0003676	GO:0046872
EFV53400	GO:0006486	GO:0008375	GO:0016020	GO:0016021
EFV53432
EFV53497	GO:0055114	GO:0016491	GO:0016020	GO:0016021
EFV53526	GO:0055085	GO:0016020	GO:0016021
EFV53535	GO:0006096	GO:0003824	GO:0004332	GO:0016829
EFV53558	GO:0006355	GO:0003700	GO:0005634	GO:0016020	GO:0016021
EFV53567	GO:0008299	GO:0016740
EFV53576
EFV53590	GO:0009264	GO:0003824	GO:0004139	GO:0016829	GO:0005737
EFV53721	GO:0016020
EFV53742	GO:0008152	GO:0003824	GO:0016747
EFV53744	GO:0003676	GO:0003723
EFV53759	GO:0006457	GO:0051082
EFV53808	GO:0006355
EFV53821	GO:0008270
EFV53848	GO:0006810	GO:0008152	GO:0055085	GO:0000166	GO:0005524	GO:0016887	GO:0042626	GO:0016020	GO:0016021
EFV53862	GO:0006810	GO:0055085	GO:0005509	GO:0016020	GO:0016021
EFV53891	GO:0016020	GO:0016021
EFV53906	GO:0016055	GO:0035556	GO:0005622
EFV53919	GO:0005515
EFV53958
EFV53959	GO:0005515
EFV53964	GO:0046983
EFV53987	GO:0007165	GO:0035023	GO:0035556	GO:0043547	GO:0005057	GO:0005089	GO:0005622
EFV54009	GO:0006412	GO:0003735	GO:0005622	GO:0005840
EFV54010	GO:0000166	GO:0003676
EFV54039	GO:0030001	GO:0055085	GO:0046873	GO:0016020	GO:0016021
EFV54047	GO:0005852
EFV54055	GO:0005975	GO:0006013	GO:0008152	GO:0003824	GO:0004553	GO:0004559	GO:0008270	GO:0015923	GO:0016787	GO:0016798	GO:0030246	GO:0046872	GO:0016020	GO:0016021
EFV54094	GO:0008152	GO:0003824	GO:0035091	GO:0016020	GO:0016021
EFV54119	GO:0015992	GO:0055085	GO:0016820	GO:0016471
EFV54156	GO:0043547	GO:0005096	GO:0046872
EFV54175	GO:0006281	GO:0006284	GO:0006285	GO:0006974	GO:0008152	GO:0000703	GO:0003676	GO:0003677	GO:0003824	GO:0003906	GO:0016787	GO:0016798	GO:0016829	GO:0019104	GO:0046872	GO:0051536	GO:0051539	GO:0005634	GO:0005739
EFV54185	GO:0016020
EFV54186	GO:0016020
EFV54191	GO:0006784	GO:0055114	GO:0016627	GO:0016020	GO:0016021
EFV54236	GO:0019722
EFV54240	GO:0016020
EFV54269
EFV54270	GO:0016226	GO:0003677	GO:0005506	GO:0051536
EFV54318	GO:0006886	GO:0005784	GO:0016020	GO:0016021
EFV54322	GO:0006139	GO:0090305	GO:0090503	GO:0003676	GO:0004527	GO:0004534	GO:0008270	GO:0005634
EFV54326	GO:0006396	GO:0000166	GO:0003676	GO:0003723
EFV54353
EFV54356	GO:0005975	GO:0019752	GO:0055114	GO:0003824	GO:0004459	GO:0016491	GO:0016616
EFV54367	GO:0006810	GO:0008152	GO:0055085	GO:0005524	GO:0016887	GO:0042626	GO:0016020	GO:0016021
EFV54370	GO:0005515
EFV54416	GO:0005515
EFV54423	GO:0005515
EFV54444	GO:0007018	GO:0008152	GO:0003777	GO:0005509	GO:0005524	GO:0016887
EFV54453	GO:0005515
EFV54486	GO:0006355	GO:0003677
EFV54496
EFV54561	GO:0006915	GO:0005761	GO:0015935
EFV54579	GO:0006810	GO:0008643	GO:0015780	GO:0015992	GO:1901679	GO:0005338	GO:0005351	GO:0000139	GO:0016020	GO:0016021
EFV54634	GO:0005975	GO:0006012	GO:0003824	GO:0003978	GO:0016853	GO:0016857	GO:0050662
EFV54635	GO:0006508	GO:0006508	GO:0004222	GO:0008233	GO:0008237	GO:0008270	GO:0016787	GO:0046872	GO:0031012
EFV54640	GO:0016020
EFV54682	GO:0008152	GO:0003676	GO:0004386	GO:0005524	GO:0016787
EFV54694	GO:0016020
EFV54700
EFV54702	GO:0032259	GO:0008168
EFV54757	GO:0006412	GO:0006418	GO:0006437	GO:0045116	GO:0000166	GO:0003723	GO:0004812	GO:0004831	GO:0005524	GO:0008641	GO:0016874	GO:0016881	GO:0019781	GO:0005737
EFV54761
EFV54762	GO:0016310	GO:0032957	GO:0000287	GO:0005524	GO:0047325	GO:0052725	GO:0052726	GO:0005622
EFV54770	GO:0016020	GO:0016021
EFV54782
EFV54784	GO:0016020	GO:0016021
EFV54801	GO:0006614	GO:0008152	GO:0005509	GO:0008312	GO:0016462	GO:0030942	GO:0005786	GO:0048500
EFV54803	GO:0016311	GO:0035335	GO:0004725	GO:0016787	GO:0016791	GO:0016020	GO:0016021
EFV54816	GO:0006139	GO:0016310	GO:0005524	GO:0016301	GO:0016740	GO:0019205
EFV54837	GO:0000103	GO:0016310	GO:0070814	GO:0000166	GO:0004020	GO:0005524	GO:0016301	GO:0016740
EFV54853	GO:0006378	GO:0006379	GO:0055114	GO:0000104	GO:0005847
EFV54860	GO:0003676	GO:0046872
EFV54875	GO:0007155	GO:0007156	GO:0005509	GO:0005886	GO:0016020	GO:0016021
EFV54878
EFV54909	GO:0006470	GO:0016311	GO:0035335	GO:0004725	GO:0008138	GO:0016787	GO:0016791
EFV54917	GO:0055114	GO:0004497	GO:0004499	GO:0016491	GO:0050660	GO:0050661	GO:0016020	GO:0016021
EFV54939	GO:0006366	GO:0006413	GO:0003743	GO:0046982
EFV54945	GO:0007165	GO:0071526	GO:0017154
EFV54949
EFV54952	GO:0006412	GO:0003735	GO:0005622	GO:0005840	GO:0030529
EFV55010	GO:0006629	GO:0008081	GO:0030246	GO:2001070
EFV55068	GO:0005975	GO:0006099	GO:0006108	GO:0019752	GO:0055114	GO:0003824	GO:0016491	GO:0016615	GO:0016616	GO:0030060
EFV55077	GO:0006810	GO:0006811	GO:0071805	GO:0005267	GO:0016020	GO:0016021
EFV55099	GO:0006810	GO:0006811	GO:0005215	GO:0005886	GO:0016020	GO:0016021
EFV55197	GO:0016020
EFV55199	GO:0009966	GO:0043086	GO:0043666	GO:0004864
EFV55204	GO:0006412	GO:0003735	GO:0005622	GO:0005840
EFV55214	GO:0090502	GO:0003723	GO:0033897
EFV55221	GO:0006413	GO:0003743
EFV55230	GO:0006470	GO:0008152	GO:0004721	GO:0016787
EFV55275	GO:0016020
EFV55284	GO:0008152	GO:0016787
EFV55296	GO:0006412	GO:0003735	GO:0005840
EFV55297	GO:0006024	GO:0008152	GO:0015012	GO:0003824	GO:0016021
EFV55335	GO:0016020
EFV55337	GO:0010466	GO:0003677	GO:0008270	GO:0030414	GO:0046872	GO:0005576	GO:0005634
EFV55339	GO:0005634
EFV55352	GO:0006400	GO:0008616	GO:0008479	GO:0016740
EFV55357	GO:0002098	GO:0002143	GO:0006777	GO:0008033	GO:0008152	GO:0018192	GO:0034227	GO:0000166	GO:0003824	GO:0004792	GO:0005524	GO:0008641	GO:0016740	GO:0016779	GO:0016783	GO:0046872	GO:0005737	GO:0005737	GO:0005737	GO:0005829	GO:0016020	GO:0016021
EFV55358	GO:0005515
EFV55362	GO:0016020	GO:0016021
EFV55364	GO:0006414	GO:0003746
EFV55402	GO:0007165	GO:0043087
EFV55432	GO:0007165
EFV55488
EFV55493
EFV55517	GO:0051016	GO:0051693	GO:0003779	GO:0008290	GO:0016020	GO:0016021
EFV55521	GO:0006486	GO:0006810	GO:0006888	GO:0008378	GO:0005737	GO:0005801	GO:0016020
EFV55525
EFV55581	GO:0016020
EFV55601	GO:0046872	GO:0000502
EFV55609	GO:0005488	GO:0005515
EFV55613	GO:0016579	GO:0003677	GO:0004843
EFV55624	GO:0007165	GO:0007186	GO:0004871	GO:0004930	GO:0016020	GO:0016021
EFV55625	GO:0006396	GO:0006402	GO:0090503	GO:0000175	GO:0003676	GO:0003723	GO:0004654	GO:0016740	GO:0016020	GO:0016021
EFV55633	GO:0005975	GO:0009298	GO:0004476	GO:0008270	GO:0016853
EFV55636	GO:0005515
EFV55653	GO:0006418	GO:0006428	GO:0006450	GO:0000166	GO:0002161	GO:0004812	GO:0004822	GO:0005524	GO:0005737
EFV55660	GO:0006412	GO:0003735	GO:0005622	GO:0005840
EFV55663	GO:0005515
EFV55675	GO:0006164	GO:0006177	GO:0003922	GO:0005524	GO:0016462
EFV55688	GO:0000398	GO:0006396	GO:0006397	GO:0005622	GO:0005634
EFV55707	GO:0006355	GO:0008152	GO:0043044	GO:0005524	GO:0016817	GO:0016887	GO:0042393	GO:0005634	GO:0016514
EFV55768
EFV55806	GO:0006561	GO:0055114	GO:0004735
EFV55811	GO:0005515	GO:0016020
EFV55869
EFV55895	GO:0008152	GO:0003824
EFV55906	GO:0006629	GO:0030148	GO:0055114	GO:0042284	GO:0016020	GO:0016021
EFV55907	GO:0006886	GO:0005622
EFV55914	GO:0006412	GO:0003723	GO:0003735	GO:0019843	GO:0005622	GO:0005840	GO:0030529
EFV55953	GO:0005515
EFV55989
EFV56008	GO:0007165	GO:0034047	GO:0008601	GO:0000159
EFV56044	GO:0006259	GO:0090305	GO:0003677	GO:0004518	GO:0005524	GO:0016787
EFV56061	GO:0008152	GO:0016787	GO:0016020	GO:0016021
EFV56074	GO:0006413	GO:0000166	GO:0003676	GO:0003743
EFV56075	GO:0006810	GO:0008152	GO:0000166	GO:0005215	GO:0005524	GO:0016887	GO:0016020	GO:0016021
EFV56076	GO:0016192	GO:0016020
EFV56082	GO:0003677
EFV56098	GO:0003676
EFV56101	GO:0016020
EFV56108	GO:0007155	GO:0007229	GO:0008305	GO:0016020	GO:0016021
EFV56115	GO:0005515
EFV56185	GO:0005524
EFV56187
EFV56197	GO:0000062	GO:0003676	GO:0008270
EFV56231	GO:0005515
EFV56237	GO:0016020	GO:0016021
EFV56277	GO:0016192	GO:0000166	GO:0003676	GO:0016020	GO:0016021
EFV56306	GO:0005515
EFV56314	GO:0005515
EFV56324	GO:0003676	GO:0008270	GO:0046872
EFV56335	GO:0006357	GO:0001104	GO:0016592
EFV56346	GO:0008152	GO:0003824	GO:0016829	GO:0030170
EFV56368	GO:0008152	GO:0003676	GO:0003723	GO:0016787	GO:0005840
EFV56377	GO:0008270	GO:0046872
EFV56401	GO:0006412	GO:0006418	GO:0006421	GO:0000166	GO:0003676	GO:0004812	GO:0004816	GO:0005524	GO:0016874	GO:0005737
EFV56407	GO:0005840	GO:0016020	GO:0016021
EFV56413	GO:0055085	GO:0016020	GO:0016021
EFV56432	GO:0006412	GO:0003735	GO:0005840	GO:0030529
EFV56439	GO:0008152	GO:0006629
EFV56450	GO:0007264	GO:0000166	GO:0005525	GO:0005622
EFV56461	GO:0006355	GO:0008270	GO:0005634
EFV56469	GO:0006338	GO:0000228
EFV56485	GO:0006221	GO:0006541	GO:0044210	GO:0000166	GO:0003883	GO:0005198	GO:0005524	GO:0016874	GO:0005923
EFV56504	GO:0006260	GO:0071897	GO:0003677	GO:0003887
EFV56516	GO:0016310	GO:0043551	GO:0016301	GO:0035014	GO:0005942
EFV56520	GO:0006810	GO:0006835	GO:0055085	GO:0015293	GO:0017153	GO:0016020	GO:0016021
EFV56529
EFV56531	GO:0007186	GO:0004930	GO:0016020	GO:0016021
EFV56545	GO:0008152	GO:0016740
EFV56588	GO:0006007	GO:0008152	GO:0003824	GO:0004619	GO:0030145	GO:0046872	GO:0005737
EFV56619	GO:0006470	GO:0003824	GO:0004721	GO:0004722	GO:0016787	GO:0043169	GO:0046872
EFV56639	GO:0019013	GO:0030529
EFV56656	GO:0017183	GO:0016020	GO:0016021
EFV56674	GO:0006164	GO:0006189	GO:0003676	GO:0004639	GO:0005524
EFV56681	GO:0016020
EFV56726	GO:0006412	GO:0003723	GO:0003735	GO:0005840	GO:0015935	GO:0030529
EFV56739	GO:0005515
EFV56743	GO:0006351	GO:0006486	GO:0007049	GO:0016740	GO:0016757	GO:0030246	GO:0046872	GO:0000139	GO:0005794	GO:0016020	GO:0016021	GO:0070176
EFV56788	GO:0003677	GO:0005634
EFV56795	GO:0006355	GO:0003677	GO:0003700	GO:0016020	GO:0016021
EFV56841
EFV56850	GO:0006810	GO:0007165	GO:0005215	GO:0008158	GO:0016020	GO:0016021
EFV56859	GO:0005634
EFV56879	GO:0006508	GO:0004222	GO:0005524	GO:0008270	GO:0046872
EFV56884	GO:0008270	GO:0046872
EFV56912	GO:0016310	GO:0016301
EFV56925	GO:0006351	GO:0006355	GO:0007049	GO:0003677	GO:0003700	GO:0005634	GO:0005667
EFV56926	GO:0007017	GO:0005875
EFV57011	GO:0005198	GO:0005882
EFV57050	GO:0032508	GO:0000166	GO:0003678	GO:0005524	GO:0043141
EFV57057	GO:0006810	GO:0016021
EFV57071	GO:0005515
EFV57091	GO:0003676
EFV57160	GO:0006414	GO:0000166	GO:0003746	GO:0003924	GO:0005525
EFV57196	GO:0005515
EFV57260	GO:0000166	GO:0003676
EFV57314	GO:0006281	GO:0003677	GO:0005524	GO:0008094
EFV57316
EFV57325	GO:0007018	GO:0008152	GO:0000166	GO:0003777	GO:0005524	GO:0008017		GO:0005871	GO:0005874	GO:0016020	GO:0016021
EFV57375	GO:0006508	GO:0008233	GO:0005615
EFV57456
EFV57458	GO:0006749	GO:0003840
EFV57482
EFV57488	GO:0006633
EFV57489	GO:0008152	GO:0000166	GO:0005524	GO:0016887
EFV57521
EFV57535
EFV57546	GO:0005975	GO:0004553
EFV57564	GO:0006357	GO:0001104	GO:0016592
EFV57584	GO:0006412	GO:0003735	GO:0005622	GO:0005737	GO:0005840	GO:0022627	GO:0030529
EFV57596	GO:0006537	GO:0006807	GO:0008152	GO:0055114	GO:0003824	GO:0005506	GO:0010181	GO:0015930	GO:0016040	GO:0016491	GO:0016638	GO:0016639	GO:0045181	GO:0050660	GO:0051536
EFV57612	GO:0006338	GO:0008152	GO:0043044	GO:0003676	GO:0003677	GO:0005524	GO:0016818	GO:0031491	GO:0005634
EFV57630
EFV57649	GO:0003824
EFV57652	GO:0055114	GO:0005506	GO:0010181	GO:0016491
EFV57695	GO:0006351	GO:0006355	GO:0003677	GO:0003700	GO:0046983	GO:0005634	GO:0005667	GO:0005737
EFV57716	GO:1902600	GO:0004129	GO:0005743
EFV57735	GO:0006396	GO:0006412	GO:0090501	GO:0090502	GO:0003677	GO:0003723	GO:0003735	GO:0004525	GO:0005524	GO:0016787	GO:0016891	GO:0005622	GO:0005840
EFV57812	GO:0007186	GO:0004930	GO:0016020	GO:0016021
EFV57838	GO:0008270	GO:0016020	GO:0016021
EFV57840	GO:0007165
EFV57870	GO:0008270	GO:0046872	GO:0016020	GO:0016021
EFV57904	GO:0006355	GO:0005634
EFV57938	GO:0003676
EFV57941	GO:0007155	GO:0007156	GO:0005509	GO:0005886	GO:0016020	GO:0016021
EFV57943	GO:0006478	GO:0008476	GO:0016740
EFV57949
EFV57966
EFV57990	GO:0051276	GO:0055114	GO:0005524	GO:0016491	GO:0016651	GO:0048038	GO:0051287	GO:0005694
EFV58014	GO:0006259	GO:0006265	GO:0000166	GO:0003677	GO:0003916	GO:0003918	GO:0005524	GO:0016853
EFV58028	GO:0032259	GO:0003824	GO:0008168	GO:0016740
EFV58065	GO:0005509
EFV58078	GO:0007017	GO:0008152	GO:0051258	GO:0000166	GO:0003924	GO:0005200	GO:0005525	GO:0005737	GO:0005856	GO:0005874	GO:0043234
EFV58096	GO:0001522	GO:0006396	GO:0009451	GO:0003723	GO:0009982	GO:0019013	GO:0030529
EFV58107	GO:0005977	GO:0016310	GO:0003824	GO:0005516	GO:0016301
EFV58132	GO:0008270
EFV58141	GO:0006812	GO:0055085	GO:0098655	GO:0008324	GO:0016021
EFV58144	GO:0016020
EFV58174	GO:0009052	GO:0004751	GO:0016853
EFV58197	GO:0005975	GO:0016311	GO:0016787	GO:0042132	GO:0042578
EFV58198	GO:0006351	GO:0007049	GO:0017053
EFV58199	GO:0005488
EFV58201	GO:0019904
EFV58204	GO:0003677	GO:0008270
EFV58278
EFV58282	GO:0042254	GO:0005840	GO:0030529
EFV58293	GO:0006511	GO:0030833	GO:0034314	GO:0005885	GO:0015629
EFV58303	GO:0006412	GO:0003735	GO:0005622	GO:0005840
EFV58309	GO:0008152	GO:0003676	GO:0004386	GO:0005524	GO:0016787
EFV58312	GO:0007165	GO:0007186	GO:0004871	GO:0004930	GO:0016020	GO:0016021
EFV58347	GO:0016020	GO:0016021
EFV58396
EFV58401
EFV58402	GO:0006412	GO:0006418	GO:0006420	GO:0000166	GO:0004812	GO:0004812	GO:0004814	GO:0005524	GO:0016874	GO:0005737	GO:0016020	GO:0016021
EFV58431	GO:0005509
EFV58432
EFV58464	GO:0042254
EFV58515	GO:0046907	GO:0008270	GO:0005622	GO:0016020	GO:0016021
EFV58516	GO:0000166	GO:0003676
EFV58537
EFV58556	GO:0005488
EFV58557	GO:0008152	GO:0009081	GO:0009082	GO:0003824	GO:0004084	GO:0008483	GO:0016740	GO:0052654	GO:0052655	GO:0052656
EFV58568	GO:0005515
EFV58572	GO:0045454	GO:0055114	GO:0009055	GO:0015035	GO:0046872	GO:0051536	GO:0051537	GO:0005623
EFV58588	GO:0008152	GO:0051781	GO:0003824	GO:0008083	GO:0016874	GO:0016020
EFV58633	GO:0006367	GO:0006413	GO:0003743	GO:0005669
EFV58647
EFV58673	GO:0003676	GO:0016020	GO:0016021
EFV58705	GO:0009312	GO:0008455	GO:0005795	GO:0016021
EFV58714	GO:0006099	GO:0008152	GO:0003994	GO:0016829	GO:0046872	GO:0051536	GO:0051539	GO:0005739
EFV58736	GO:0005509	GO:0016020	GO:0016021
EFV58768
EFV58812	GO:0008270	GO:0046872
EFV58823	GO:0006486	GO:0036065	GO:0008417	GO:0016740	GO:0016757	GO:0005794	GO:0016020	GO:0016021	GO:0032580
EFV58830	GO:0009165	GO:0000287	GO:0004749
EFV58865	GO:0006396	GO:0090501	GO:0090502	GO:0003723	GO:0004525	GO:0016891
EFV58871	GO:0016020
EFV58892	GO:0003677
EFV58952	GO:0006457	GO:0009408	GO:0005524	GO:0031072	GO:0046872	GO:0051082	GO:0016020	GO:0016021	GO:0016272
EFV58953	GO:0040007	GO:0008083	GO:0005576
EFV58965	GO:0008152	GO:0016758	GO:0016020	GO:0016021
EFV58983	GO:0005975	GO:0006098	GO:0008152	GO:0003824	GO:0004750	GO:0016853	GO:0016857	GO:0046872
EFV58989	GO:0055114	GO:0016491	GO:0016020	GO:0016021
EFV58998	GO:0003677	GO:0046983
EFV59020	GO:0005975	GO:0005978	GO:0005980	GO:0003824	GO:0004134	GO:0004135
EFV59024	GO:0006813	GO:0071805	GO:0005516	GO:0015269	GO:0016286	GO:0016020	GO:0016021
EFV59029	GO:0006281	GO:0006413	GO:0090305	GO:0003677	GO:0003743	GO:0003824	GO:0003924	GO:0004518	GO:0005525	GO:0016787	GO:0016788	GO:0005622	GO:0005634
EFV59032	GO:0019673	GO:0008446
EFV59041	GO:0006412	GO:0003735	GO:0005840
EFV59046	GO:0007154	GO:0007219	GO:0007275	GO:0005509	GO:0016020	GO:0016021
EFV59079	GO:0000398	GO:0030001	GO:0055085	GO:0046873	GO:0016020	GO:0016021	GO:0019013	GO:0030529	GO:0046540
EFV59124	GO:0016567	GO:0004842	GO:0008270	GO:0046872	GO:0005680
EFV59131	GO:0006351	GO:0006355	GO:0003677	GO:0003700	GO:0043565	GO:0005634
EFV59137	GO:0045893	GO:0003677	GO:0005634	GO:0016020	GO:0016021
EFV59144	GO:0003677
EFV59164	GO:0016020
EFV59175	GO:0006412	GO:0008654	GO:0003735	GO:0016780	GO:0005622	GO:0005840	GO:0015935	GO:0016020	GO:0016021	GO:0030529
EFV59188	GO:0005856
EFV59201	GO:0005515
EFV59205	GO:0006810	GO:0015671	GO:0005344	GO:0019825	GO:0020037
EFV59212	GO:0006810	GO:0006886	GO:0015031	GO:0016192	GO:0005198	GO:0000139	GO:0005737	GO:0005794	GO:0016020	GO:0030117	GO:0030126	GO:0030663	GO:0031410
EFV59223	GO:0046856	GO:0000166	GO:0016787	GO:0042578
EFV59230	GO:0016579	GO:0008270	GO:0036459	GO:0046872
EFV59279	GO:0005515	GO:0019904
EFV59284	GO:0006098	GO:0055114	GO:0004616	GO:0016491	GO:0050661
EFV59293	GO:0006470	GO:0016311	GO:0035335	GO:0004725	GO:0008138	GO:0016791
EFV59301	GO:0008152	GO:0003676	GO:0003824
EFV59302	GO:0006357	GO:0001104	GO:0016592
EFV59329	GO:0006303	GO:0032508	GO:0003677	GO:0004003	GO:0016020	GO:0016021
EFV59335	GO:0003676	GO:0046872
EFV59360	GO:0006030	GO:0008061	GO:0005576
EFV59378	GO:0005515
EFV59382	GO:0016020
EFV59383	GO:0007155	GO:0051015
EFV59404	GO:0016020	GO:0016021
EFV59416	GO:0051205	GO:0016020	GO:0016021
EFV59434	GO:0006895	GO:0007264	GO:0008152	GO:0015031	GO:0032456	GO:0042742	GO:0090382	GO:0000166	GO:0003924	GO:0005525	GO:0005802	GO:0045335	GO:0055037
EFV59437	GO:0000398	GO:0005681
EFV59469
EFV59495	GO:0006904	GO:0016192	GO:0005623
EFV59501	GO:0006468	GO:0006508	GO:0000166	GO:0004177	GO:0004672	GO:0005524	GO:0008236
EFV59530	GO:1902600	GO:0004129	GO:0005739
EFV59548	GO:0006412	GO:0003735	GO:0005840	GO:0016020	GO:0016021
EFV59558	GO:0003677	GO:0005634
EFV59570	GO:0003676	GO:0008270
EFV59576	GO:0006099	GO:0008654	GO:0022900	GO:0055114	GO:0004609	GO:0008177	GO:0016491	GO:0016627	GO:0050660	GO:0005743	GO:0016020
EFV59578	GO:0006352	GO:0006355	GO:0006413	GO:0003700	GO:0003743	GO:0046982	GO:0005669
EFV59622	GO:0006412	GO:0003735	GO:0005622	GO:0005840
EFV59661	GO:0006412	GO:0003735	GO:0008270	GO:0046872	GO:0005622	GO:0005840	GO:0016020	GO:0016021
EFV59700
EFV59708	GO:0051537	GO:0043231
EFV59723	GO:0008152	GO:0016310	GO:0044206	GO:0044211	GO:0000166	GO:0004849	GO:0005524	GO:0016301	GO:0016740
EFV59764	GO:0006850	GO:0005743	GO:0016020	GO:0016021
EFV59786	GO:0000902	GO:0000910	GO:0019752	GO:0035023	GO:0035556	GO:0043547	GO:0045666	GO:0003824	GO:0005085	GO:0005089	GO:0005096	GO:0016829	GO:0016831	GO:0030170	GO:0005634	GO:0005737
EFV59796	GO:0005975	GO:0006098	GO:0090305	GO:0003723	GO:0004527	GO:0017057
EFV59823	GO:0002098	GO:0034227	GO:0000049	GO:0005524
EFV59851	GO:0008063
EFV59896	GO:0006412	GO:0003735	GO:0005622	GO:0005840
EFV59963	GO:0016020
EFV59968	GO:0006629	GO:0006631	GO:0006633	GO:0016740	GO:0016020	GO:0016021
EFV60018	GO:0035556	GO:0046872	GO:0005622
EFV60024	GO:0006413	GO:0044237	GO:0003743
EFV60038	GO:0008152	GO:0016787
EFV60050	GO:0005515
EFV60080	GO:0006412	GO:0003735	GO:0005622	GO:0005840	GO:0016020	GO:0016021
EFV60121	GO:0010506	GO:0005615
EFV60134	GO:0008152	GO:0000166	GO:0003824	GO:0004075	GO:0005524	GO:0016874	GO:0046872
EFV60140	GO:0016020
EFV60141	GO:0006812	GO:0098655	GO:0008324	GO:0016020	GO:0016021
EFV60143	GO:0006368	GO:0016570	GO:0016593
EFV60165	GO:0005975	GO:0006013	GO:0008152	GO:0003824	GO:0004553	GO:0004559	GO:0008270	GO:0015923	GO:0016787	GO:0016798	GO:0030246	GO:0046872
EFV60170	GO:0008270	GO:0046872	GO:0016020	GO:0016021
EFV60187	GO:0055114	GO:0004497	GO:0005506	GO:0016491	GO:0016705	GO:0020037	GO:0046872
EFV60199	GO:0006810	GO:0006888	GO:0005622	GO:0005737
EFV60201	GO:0006886	GO:0016192	GO:0008270	GO:0046872	GO:0005622
EFV60217	GO:0008152	GO:0055114	GO:0016491	GO:0048786
EFV60220	GO:0006289	GO:0032508	GO:0004003	GO:0000439	GO:0005634	GO:0016020	GO:0016021
EFV60234	GO:0006810	GO:0006811	GO:0006816	GO:0008152	GO:0070588	GO:0000166	GO:0005388	GO:0005524	GO:0016787	GO:0046872	GO:0016020	GO:0016021
EFV60271	GO:0008152	GO:0016740	GO:0016757
EFV60294
EFV60316	GO:0008270
EFV60320	GO:0006886	GO:0006888	GO:0008270	GO:0030127
EFV60336	GO:0006334	GO:0005634
EFV60363	GO:0006357	GO:0001104	GO:0016592
EFV60367	GO:0000387	GO:0000398	GO:0003676	GO:0003723	GO:0008270	GO:0005634	GO:0005685	GO:0019013	GO:0030529
EFV60379	GO:0008152	GO:0016787
EFV60381	GO:0008033
EFV60396	GO:0006397	GO:0031124	GO:0000166	GO:0005524	GO:0005634	GO:0005849	GO:0016020	GO:0016021
EFV60416	GO:0006355	GO:0003700	GO:0008270	GO:0043565
EFV60445	GO:0007016	GO:0005509	GO:0008270	GO:0016010	GO:0016020	GO:0016021
EFV60448	GO:0055114	GO:0009055	GO:0020037	GO:0046872	GO:0005739	GO:0070469
EFV60478	GO:0016020
EFV60512	GO:0005509
EFV60513	GO:0031123	GO:0043631	GO:0003723	GO:0004652	GO:0016779	GO:0005634
EFV60533	GO:0042302	GO:0005581	GO:0016020	GO:0016021
EFV60589
EFV60595	GO:0006810	GO:0006886	GO:0015031	GO:0016192	GO:0008565	GO:0016020	GO:0030117
EFV60623	GO:0007218	GO:0030141
EFV60629	GO:0006412	GO:0003735	GO:0008097	GO:0005622	GO:0005840
EFV60646	GO:0006412	GO:0003735	GO:0005622	GO:0005840
EFV60654	GO:0008289
EFV60666	GO:0016567	GO:0030001	GO:0055085	GO:0004842	GO:0016874	GO:0046873	GO:0016020	GO:0016021
EFV60704	GO:0019511	GO:0055114	GO:0004656	GO:0005506	GO:0016491	GO:0016702	GO:0016705	GO:0031418	GO:0005783
EFV60724	GO:0046872
EFV60743	GO:0009168	GO:0019239
EFV60744	GO:0006904	GO:0000145
EFV60745	GO:0008270
EFV60751	GO:0003676	GO:0003723
EFV60786	GO:0007165	GO:0008152	GO:0005509	GO:0016787	GO:0005578
EFV60812
EFV60873	GO:0005515
EFV60907	GO:0005515
EFV60919	GO:0008152	GO:0016787
EFV60920
EFV60961	GO:0035023	GO:0043547	GO:0005089
EFV60966	GO:0006508	GO:0006508	GO:0004252	GO:0008233	GO:0008236	GO:0016787
EFV60969	GO:0070830	GO:0090162	GO:0005515
EFV60978	GO:0010466	GO:0030414	GO:0005576
EFV60982	GO:0006412	GO:0003735	GO:0005622	GO:0005840
EFV60985	GO:0005634	GO:0005737
EFV60986	GO:0000079	GO:0006355	GO:0016538	GO:0019901	GO:0016592
EFV60987	GO:0007015	GO:0008152	GO:0034314	GO:0055085	GO:0005524	GO:0042626	GO:0070569	GO:0005856	GO:0005885
EFV60993	GO:0006777	GO:0032324
EFV61063	GO:0007264	GO:0007265	GO:0035556	GO:0043087	GO:0043547	GO:0005085	GO:0005622
EFV61123	GO:0010951	GO:0004867
EFV61143	GO:0016020
EFV61170	GO:0008152	GO:0005509	GO:0016817	GO:0016020	GO:0016021
EFV61183	GO:0046872
EFV61190	GO:0006810	GO:0006811	GO:0006814	GO:0035725	GO:0005272	GO:0016020	GO:0016021
EFV61199	GO:0005509	GO:0005525
EFV61204
EFV61230	GO:0016020
EFV61233	GO:0015031	GO:0050790	GO:0005093
EFV61244	GO:0016020
EFV61250	GO:0006418	GO:0006434	GO:0000166	GO:0004812	GO:0004828	GO:0005524	GO:0005737
EFV61255	GO:0030001	GO:0055085	GO:0046873	GO:0016020	GO:0016021
EFV61375	GO:0000166	GO:0003676
EFV61397	GO:0007165	GO:0007264	GO:0000166	GO:0005525	GO:0005622	GO:0016020
EFV61402	GO:0000166	GO:0005525
EFV61421	GO:0016020	GO:0016021
EFV61442	GO:0016020	GO:0016021
EFV61446	GO:0006508	GO:0007229	GO:0004222	GO:0008237
EFV61454	GO:0006370	GO:0006397	GO:0004484
EFV61456	GO:0005515
EFV61472	GO:0006355	GO:0007423	GO:0046983
EFV61541	GO:0006950	GO:0032781	GO:0001671	GO:0051087
EFV61552	GO:0006368	GO:0006383	GO:0006810	GO:0055114	GO:1902600	GO:0003677	GO:0003899	GO:0005215	GO:0008121	GO:0016491	GO:0016679	GO:0046872	GO:0051536	GO:0051537	GO:0005666	GO:0008021	GO:0008023	GO:0016020	GO:0016021
EFV61579	GO:0005634	GO:0016020	GO:0016021
EFV61580	GO:0015991	GO:0015078	GO:0016020	GO:0016021	GO:0033179
EFV61591	GO:0006810	GO:0006811	GO:0034220	GO:0055085	GO:0005216	GO:0016020	GO:0016021
EFV61632	GO:0006412	GO:0006418	GO:0006437	GO:0000049	GO:0000166	GO:0003723	GO:0004812	GO:0004831	GO:0005524	GO:0016874	GO:0005737
EFV61654	GO:0016020
EFV61660	GO:0003676	GO:0003723
EFV61691	GO:0016020	GO:0016021
EFV61716	GO:0006810	GO:0015031	GO:0046872	GO:0005739
EFV61745	GO:0008152	GO:0016740	GO:0016020	GO:0016021
EFV61832	GO:0007166	GO:0007186	GO:0004888	GO:0004930	GO:0005886	GO:0016020	GO:0016021
EFV61876	GO:0008152	GO:0000166	GO:0003924	GO:0005525
EFV61879
EFV61969	GO:0006810	GO:0006869	GO:0016020	GO:0016021
EFV61978	GO:0006508	GO:0008233
EFV61981	GO:0003677	GO:0046983
EFV61997	GO:0006810	GO:0015031	GO:0016020
EFV61998	GO:0008152	GO:0016311	GO:0016791
EFV62007	GO:0006289	GO:0006351	GO:0000439
EFV62060	GO:0003779
EFV62081
EFV62093	GO:0008152	GO:0003824	GO:0016020	GO:0016021
EFV62145	GO:0006888	GO:0000139	GO:0005801	GO:0016021
EFV62150	GO:0046872	GO:0016020	GO:0016021
EFV62160	GO:0055085	GO:0016020	GO:0016021
EFV62202	GO:0007165
EFV62220	GO:0003677	GO:0005634
EFV62236	GO:0006220	GO:0003824	GO:0004132	GO:0008270	GO:0046872
EFV62240	GO:0005515
EFV62248	GO:0006289	GO:0032508	GO:0003677	GO:0004003	GO:0005524	GO:0016787
EFV62271	GO:0016020
EFV62291	GO:0003333	GO:0015171	GO:0016020	GO:0016021
EFV62300	GO:0006352	GO:0006355	GO:0007165	GO:0008158	GO:0008270	GO:0017025	GO:0016020	GO:0016021
EFV62314
EFV62321	GO:0005515
EFV62362	GO:0006629	GO:0055114	GO:0016627	GO:0005737	GO:0016020	GO:0016021
EFV62406	GO:0003676	GO:0046872
EFV62441	GO:0005975	GO:0000287	GO:0016868	GO:0046872
EFV62456	GO:0006355	GO:0003677	GO:0043565	GO:0005634
EFV62537	GO:0016020
EFV62552	GO:0000166	GO:0003676
EFV47705	GO:0000166	GO:0003676	GO:0016020	GO:0016021
EFV50046	GO:0006259	GO:0006302	GO:0090305	GO:0004519	GO:0004527	GO:0016787	GO:0030145	GO:0005634
EFV50703	GO:0016020	GO:0016021
EFV51228	GO:0032259	GO:0008168
EFV51367	GO:0005515
EFV52004	GO:0006024	GO:0003824	GO:0016857	GO:0016021
EFV52090	GO:0008270	GO:0046872	GO:0005622
EFV52193
EFV52597	GO:0016020
EFV53046	GO:0006810	GO:0006811	GO:0034220	GO:0003676	GO:0005230	GO:0008270	GO:0046872	GO:0005634	GO:0005886	GO:0016020	GO:0016021
EFV54817	GO:0005737
EFV55223	GO:0007165	GO:0008152	GO:0004114	GO:0008081	GO:0016787	GO:0046872
EFV56341	GO:0006614	GO:0006810	GO:0006886	GO:0008152	GO:0003924	GO:0005047	GO:0005525	GO:0005785
EFV57431	GO:0055085	GO:0005741	GO:0016020	GO:0016021
EFV57748	GO:0006139	GO:0003676
EFV58416	GO:0006412	GO:0003735	GO:0005622	GO:0005840	GO:0032040
EFV58492	GO:0006535
EFV58553	GO:0003676	GO:0008270	GO:0005634
EFV58915
EFV59686	GO:0006351	GO:0006355	GO:0043401	GO:0003677	GO:0003700	GO:0008270	GO:0043565	GO:0046872	GO:0005634
EFV59898	GO:0016020
EFV59922	GO:0006457	GO:0008152	GO:0045454	GO:0003756	GO:0016853	GO:0005783
EFV60190	GO:0006413	GO:0006470	GO:0016311	GO:0035335	GO:0003743	GO:0004721	GO:0004725	GO:0016787	GO:0016791
EFV60540	GO:0016020
EFV60600	GO:0055085	GO:0046872	GO:0016020	GO:0016021
EFV60808	GO:0055114	GO:0005506	GO:0016491	GO:0016705	GO:0031418	GO:0046872
EFV50718	GO:0005488
EFV50939	GO:0008152	GO:0055114	GO:0003676	GO:0008080	GO:0008270	GO:0020037	GO:0046872	GO:0051213
EFV51173	GO:0016020	GO:0016021
EFV54390	GO:0006269	GO:0003896
EFV54808	GO:0045892	GO:0005634
EFV55090	GO:0005515
EFV55586	GO:0006457	GO:0000166	GO:0005524	GO:0051082	GO:0005737
EFV55842	GO:0006810	GO:0006811	GO:0034220	GO:0055085	GO:0005216	GO:0016020	GO:0016021
EFV55872	GO:0006511	GO:0016579	GO:0016787	GO:0036459
EFV56183
EFV56471	GO:0016020
EFV56847	GO:0001510	GO:0006396	GO:0000166	GO:0003676	GO:0008173
EFV58008	GO:0045454	GO:0055114	GO:0016491	GO:0046983	GO:0050660	GO:0005623
EFV59494	GO:0003677	GO:0046872	GO:0005634
EFV59704	GO:0008152	GO:0055114	GO:0016491	GO:0016020	GO:0016021
EFV60103	GO:0006412	GO:0003735	GO:0005622	GO:0005840
EFV60399	GO:0003723	GO:0005525
EFV60479	GO:0006231	GO:0032259	GO:0004799	GO:0008168	GO:0016740
EFV60905	GO:0008152	GO:0003824	GO:0016020	GO:0016021
EFV62419
EFV48137
EFV49306
EFV52768	GO:0008152	GO:0016787
EFV54473	GO:0016020
EFV54670	GO:0000166	GO:0003676
EFV56573	GO:0008033	GO:0090501	GO:0003824	GO:0004540
EFV57233	GO:0046983
EFV57745	GO:0008152	GO:0004408	GO:0016829	GO:0005739	GO:0016020	GO:0016021
EFV58646	GO:0006351	GO:0003899
EFV59707	GO:0003677
EFV59717	GO:0016021
EFV60368	GO:0006260	GO:0006275	GO:0003677	GO:0030337	GO:0005634
EFV60927	GO:0006086	GO:0006281	GO:0008152	GO:0032259	GO:0055114	GO:0003824	GO:0003908	GO:0004739
EFV61392	GO:0008152	GO:0003824
EFV55016	GO:0006457	GO:0000166	GO:0005524	GO:0051082	GO:0005737
EFV56175	GO:0016020
EFV58032	GO:0006461	GO:0034047	GO:0008601
EFV58473	GO:0006412	GO:0006413	GO:0007034	GO:0003743	GO:0005737	GO:0005852
EFV47939	GO:0003723
EFV50493	GO:0008083
EFV51508	GO:0006506	GO:0006897	GO:0016746	GO:0005789	GO:0016020	GO:0016021
EFV52103	GO:0005488
EFV53549	GO:0090305	GO:0003676	GO:0004527
EFV52284	GO:0006412	GO:0003735	GO:0005622	GO:0005840
EFV52642	GO:0005515
EFV53960	GO:0006281	GO:0006281	GO:0006284	GO:0006974	GO:0008152	GO:0004844	GO:0016787	GO:0016798	GO:0016799	GO:0005634	GO:0005739
EFV54137	GO:0006506	GO:0016758	GO:0016012	GO:0016020	GO:0016021
EFV56685	GO:0001731	GO:0006412	GO:0006413	GO:0006446	GO:0000166	GO:0003676	GO:0003723	GO:0003743	GO:0031369	GO:0005737	GO:0005852	GO:0016282	GO:0033290
EFV56960	GO:0008152	GO:0004571	GO:0005509	GO:0016787	GO:0016798	GO:0016020
EFV57197	GO:0006281	GO:0071897	GO:0003684	GO:0003887	GO:0016020	GO:0016021
EFV57656	GO:0006412	GO:0003735	GO:0005622	GO:0005840
EFV58184	GO:0006412	GO:0006418	GO:0006429	GO:0006450	GO:0000166	GO:0002161	GO:0004812	GO:0004823	GO:0005524	GO:0016874	GO:0005737
EFV58820	GO:0006887	GO:0000145
EFV59699	GO:0042351	GO:0003824	GO:0050577	GO:0050662	GO:0016020	GO:0016021
EFV61046	GO:0008152	GO:0016874	GO:0016020	GO:0016021
EFV55343	GO:0000398	GO:0005681	GO:0019013	GO:0030529
EFV56408	GO:0006413	GO:0003743	GO:0008270	GO:0046872
EFV57430	GO:0001172	GO:0003968
EFV59762	GO:0006810	GO:0008152	GO:0045048	GO:0000166	GO:0005524	GO:0016887	GO:0046872	GO:0005737	GO:0005783
EFV60168	GO:0001522	GO:0006396	GO:0009451	GO:0003723	GO:0009982
EFV60530	GO:0051603	GO:0004298	GO:0000502	GO:0005839
EFV52248	GO:0000139	GO:0016020
EFV53588
EFV54606	GO:0016020
EFV57490	GO:0016020
EFV57539	GO:0006508	GO:0004180	GO:0008233	GO:0008237	GO:0008241	GO:0016787	GO:0046872	GO:0016020
EFV59475
EFV62228	GO:0005515
EFV62503	GO:0006334	GO:0003677	GO:0046982	GO:0000786	GO:0005634	GO:0005694
EFV50310	GO:0006457	GO:0006508	GO:0051259	GO:0004222	GO:0008233	GO:0008237	GO:0008270	GO:0016787	GO:0046872	GO:0046983	GO:0051087
EFV50384	GO:0008615	GO:0042823	GO:0055114	GO:0004733	GO:0010181	GO:0016491	GO:0016638
EFV51273
EFV56123	GO:0008152	GO:0009058	GO:0055114	GO:0003824	GO:0004312	GO:0004313	GO:0004314	GO:0004315	GO:0004316	GO:0004317	GO:0004319	GO:0004320	GO:0016295	GO:0016296	GO:0016297	GO:0016491	GO:0016740	GO:0016788
EFV60563	GO:0005515
EFV47704
EFV51048	GO:0006281	GO:0006289	GO:0006351	GO:0008270	GO:0046872	GO:0000439
EFV58524	GO:0006415	GO:0016149	GO:0005737
EFV60834	GO:0003723
EFV50271	GO:0006259	GO:0090305	GO:0003677	GO:0004518
EFV57080	GO:0006810	GO:0016021
EFV61962	GO:0006508	GO:0008152	GO:0008237	GO:0016787
