# Supplementary material for: Comparative Genomic Analysis of Trichinella spiralis Reveals Potential Mechanisms of Adaptive Evolution
Source: Biomed Res Int. 2019 May 21;2019:2948973. doi: 10.1155/2019/2948973 (PMC6556364; doi:10.1155/2019/2948973)
Supplement: Supplementary Materials — 2. Nucleotide sequences with more than 30% identity were selected and a total of 1997 orthologs were obtained (See Supplementary Dataset 1). Orthologs genes of five nematodes (A. ceylanicum, B. malayi, C. elegans, T. spiralis, and T. suis) for positive selection were identified. The data has been deposited in the orthologs genes of five nematodes (A. ceylanicum, B. malayi, C. elegans, T. spiralis, and T. suis) for positive selection repository. See Supplementary Dataset 1. 3. By using CODEML program to infer a dN/dS ratio for each pair of sequences, 986 genes were selected (p-value<0.01) (Supplementary Dataset 2). The data has been deposited in the positive selection genes of T. spiralis by comparing with four related nematodes. See Supplementary Dataset 2. 4. PSGs were grouped into the GO categories of biological processes, cellular components, and molecular functions (Supplementary Dataset 3). The data has been deposited in the GO analysis of PSGs in Trichinella spiralis by comparing with other four related nematodes. See Supplementary Dataset 3. 5. Gene Ontology (GO) term analysis for the positively selected genes of T. spiralis with four related nematodes (Figure 1). The figure has been deposited in the Gene Ontology (GO) term analysis for the positively selected genes of T. spiralis. See Figure 1 (included in the manuscript). 6. Molecular interaction and reaction networks of identified PSGs products were analyzed through KEGG pathway maps, which revealed that some PSGs could be ascribed to specific pathways, including metabolic pathways, the mRNA surveillance pathway, pentose phosphate pathway, amino sugar and nucleotide sugar, synthesis pathways, endocytosis, nucleotide excision repair, calcium signaling pathway, purine metabolism, inositol phosphate metabolism, and the phosphatidylinositol signaling system (Figure 2; Supplementary Dataset 4). The data has been deposited in the Pathway Information of Kyoto Encyclopedia of Genes and Genomes (KEGG) of positively [file 2948973.f1.zip › supplementary files/Supplementary dateset 4 Pathway Information of Kyoto Encyclopedia of Genes and Genomes(KEGG) of positively selected genes of Trichinella spiralis.xlsx]

## Sheet: Pathway Information of Kyoto En
Pathway Information of Kyoto Encyclopedia of Genes and Genomes(KEGG) of positively selected genes of Trichinella spiralis
ko01100 Metabolic pathways	50
	ko:K00010	iolG; myo-inositol 2-dehydrogenase / D-chiro-inositol 1-dehydrogenase [EC:1.1.1.18 1.1.1.369]
	ko:K00020	mmsB; 3-hydroxyisobutyrate dehydrogenase [EC:1.1.1.31]
	ko:K00030	IDH3; isocitrate dehydrogenase (NAD+) [EC:1.1.1.41]
	ko:K00040	uxuB; fructuronate reductase [EC:1.1.1.57]
	ko:K00051	E1.1.1.82; malate dehydrogenase (NADP+) [EC:1.1.1.82]
	ko:K00052	leuB; 3-isopropylmalate dehydrogenase [EC:1.1.1.85]
	ko:K00053	ilvC; ketol-acid reductoisomerase [EC:1.1.1.86]
	ko:K00100	E1.1.1.-
	ko:K00130	betB; betaine-aldehyde dehydrogenase [EC:1.2.1.8]
	ko:K00230	hemG; menaquinone-dependent protoporphyrinogen oxidase [EC:1.3.5.3]
	ko:K00240	sdhB; succinate dehydrogenase / fumarate reductase, iron-sulfur subunit [EC:1.3.5.1 1.3.5.4]
	ko:K00260	gudB; glutamate dehydrogenase [EC:1.4.1.2]
	ko:K00270	pdh; phenylalanine dehydrogenase [EC:1.4.1.20]
	ko:K00290	LYS1; saccharopine dehydrogenase (NAD+, L-lysine forming) [EC:1.5.1.7]
	ko:K00330	nuoA; NADH-quinone oxidoreductase subunit A [EC:1.6.5.3]
	ko:K00340	nuoK; NADH-quinone oxidoreductase subunit K [EC:1.6.5.3]
	ko:K00380	cysJ; sulfite reductase (NADPH) flavoprotein alpha-component [EC:1.8.1.2]
	ko:K00410	fbcH; ubiquinol-cytochrome c reductase cytochrome b/c1 subunit
	ko:K00430	E1.11.1.7; peroxidase [EC:1.11.1.7]
	ko:K00450	E1.13.11.4; gentisate 1,2-dioxygenase [EC:1.13.11.4]
	ko:K00460	ALOX15; arachidonate 15-lipoxygenase [EC:1.13.11.33]
	ko:K00480	E1.14.13.1; salicylate hydroxylase [EC:1.14.13.1]
	ko:K00500	phhA; phenylalanine-4-hydroxylase [EC:1.14.16.1]
	ko:K00511	SQLE; squalene monooxygenase [EC:1.14.13.132]
	ko:K00512	CYP17A; steroid 17alpha-monooxygenase / 17alpha-hydroxyprogesterone aldolase [EC:1.14.99.9 4.1.2.30]
	ko:K00531	anfG; nitrogenase delta subunit [EC:1.18.6.1]
	ko:K00600	glyA; glycine hydroxymethyltransferase [EC:2.1.2.1]
	ko:K00620	argJ; glutamate N-acetyltransferase / amino-acid N-acetyltransferase [EC:2.3.1.35 2.3.1.1]
	ko:K00630	ATS1; glycerol-3-phosphate O-acyltransferase [EC:2.3.1.15]
	ko:K00640	cysE; serine O-acetyltransferase [EC:2.3.1.30]
	ko:K00760	hprT; hypoxanthine phosphoribosyltransferase [EC:2.4.2.8]
	ko:K00770	E2.4.2.24; 1,4-beta-D-xylan synthase [EC:2.4.2.24]
	ko:K00790	murA; UDP-N-acetylglucosamine 1-carboxyvinyltransferase [EC:2.5.1.7]
	ko:K00860	cysC; adenylylsulfate kinase [EC:2.7.1.25]
	ko:K00983	E2.7.7.43; N-acylneuraminate cytidylyltransferase [EC:2.7.7.43]
	ko:K01230	MAN1; mannosyl-oligosaccharide alpha-1,2-mannosidase [EC:3.2.1.113]
	ko:K03008	RPB11; DNA-directed RNA polymerase II subunit RPB11
	ko:K03010	RPB2; DNA-directed RNA polymerase II subunit RPB2 [EC:2.7.7.6]
	ko:K03013	RPB5; DNA-directed RNA polymerases I, II, and III subunit RPABC1
	ko:K03015	RPB7; DNA-directed RNA polymerase II subunit RPB7
	ko:K03018	RPC1; DNA-directed RNA polymerase III subunit RPC1 [EC:2.7.7.6]
	ko:K03020	RPC19; DNA-directed RNA polymerases I and III subunit RPAC2
	ko:K03022	RPC8; DNA-directed RNA polymerase III subunit RPC8
	ko:K03040	rpoA; DNA-directed RNA polymerase subunit alpha [EC:2.7.7.6]
	ko:K03050	rpoE2; DNA-directed RNA polymerase subunit E" [EC:2.7.7.6]
	ko:K03060	rpoZ; DNA-directed RNA polymerase subunit omega [EC:2.7.7.6]
	ko:K03430	phnW; 2-aminoethylphosphonate-pyruvate transaminase [EC:2.6.1.37]
	ko:K04020	eutD; phosphotransacetylase
	ko:K04120	E5.5.1.13; ent-copalyl diphosphate synthase [EC:5.5.1.13]
	ko:K04122	GA3; ent-kaurene oxidase [EC:1.14.13.78]
ko01110 Biosynthesis of secondary metabolites	16
	ko:K00030	IDH3; isocitrate dehydrogenase (NAD+) [EC:1.1.1.41]
	ko:K00052	leuB; 3-isopropylmalate dehydrogenase [EC:1.1.1.85]
	ko:K00053	ilvC; ketol-acid reductoisomerase [EC:1.1.1.86]
	ko:K00230	hemG; menaquinone-dependent protoporphyrinogen oxidase [EC:1.3.5.3]
	ko:K00240	sdhB; succinate dehydrogenase / fumarate reductase, iron-sulfur subunit [EC:1.3.5.1 1.3.5.4]
	ko:K00270	pdh; phenylalanine dehydrogenase [EC:1.4.1.20]
	ko:K00290	LYS1; saccharopine dehydrogenase (NAD+, L-lysine forming) [EC:1.5.1.7]
	ko:K00430	E1.11.1.7; peroxidase [EC:1.11.1.7]
	ko:K00511	SQLE; squalene monooxygenase [EC:1.14.13.132]
	ko:K00600	glyA; glycine hydroxymethyltransferase [EC:2.1.2.1]
	ko:K00620	argJ; glutamate N-acetyltransferase / amino-acid N-acetyltransferase [EC:2.3.1.35 2.3.1.1]
	ko:K00630	ATS1; glycerol-3-phosphate O-acyltransferase [EC:2.3.1.15]
	ko:K00640	cysE; serine O-acetyltransferase [EC:2.3.1.30]
	ko:K00760	hprT; hypoxanthine phosphoribosyltransferase [EC:2.4.2.8]
	ko:K04120	E5.5.1.13; ent-copalyl diphosphate synthase [EC:5.5.1.13]
	ko:K04122	GA3; ent-kaurene oxidase [EC:1.14.13.78]
ko01120 Microbial metabolism in diverse environments	15
	ko:K00010	iolG; myo-inositol 2-dehydrogenase / D-chiro-inositol 1-dehydrogenase [EC:1.1.1.18 1.1.1.369]
	ko:K00030	IDH3; isocitrate dehydrogenase (NAD+) [EC:1.1.1.41]
	ko:K00051	E1.1.1.82; malate dehydrogenase (NADP+) [EC:1.1.1.82]
	ko:K00100	E1.1.1.-
	ko:K00190
	ko:K00240	sdhB; succinate dehydrogenase / fumarate reductase, iron-sulfur subunit [EC:1.3.5.1 1.3.5.4]
	ko:K00380	cysJ; sulfite reductase (NADPH) flavoprotein alpha-component [EC:1.8.1.2]
	ko:K00450	E1.13.11.4; gentisate 1,2-dioxygenase [EC:1.13.11.4]
	ko:K00480	E1.14.13.1; salicylate hydroxylase [EC:1.14.13.1]
	ko:K00531	anfG; nitrogenase delta subunit [EC:1.18.6.1]
	ko:K00600	glyA; glycine hydroxymethyltransferase [EC:2.1.2.1]
	ko:K00640	cysE; serine O-acetyltransferase [EC:2.3.1.30]
	ko:K00860	cysC; adenylylsulfate kinase [EC:2.7.1.25]
	ko:K01040	gctB; glutaconate CoA-transferase, subunit B [EC:2.8.3.12]
	ko:K03430	phnW; 2-aminoethylphosphonate-pyruvate transaminase [EC:2.6.1.37]
ko00230 Purine metabolism	12
	ko:K00760	hprT; hypoxanthine phosphoribosyltransferase [EC:2.4.2.8]
	ko:K00860	cysC; adenylylsulfate kinase [EC:2.7.1.25]
	ko:K03008	RPB11; DNA-directed RNA polymerase II subunit RPB11
	ko:K03010	RPB2; DNA-directed RNA polymerase II subunit RPB2 [EC:2.7.7.6]
	ko:K03013	RPB5; DNA-directed RNA polymerases I, II, and III subunit RPABC1
	ko:K03015	RPB7; DNA-directed RNA polymerase II subunit RPB7
	ko:K03018	RPC1; DNA-directed RNA polymerase III subunit RPC1 [EC:2.7.7.6]
	ko:K03020	RPC19; DNA-directed RNA polymerases I and III subunit RPAC2
	ko:K03022	RPC8; DNA-directed RNA polymerase III subunit RPC8
	ko:K03040	rpoA; DNA-directed RNA polymerase subunit alpha [EC:2.7.7.6]
	ko:K03050	rpoE2; DNA-directed RNA polymerase subunit E" [EC:2.7.7.6]
	ko:K03060	rpoZ; DNA-directed RNA polymerase subunit omega [EC:2.7.7.6]
ko03020 RNA polymerase	10
	ko:K03008	RPB11; DNA-directed RNA polymerase II subunit RPB11
	ko:K03010	RPB2; DNA-directed RNA polymerase II subunit RPB2 [EC:2.7.7.6]
	ko:K03013	RPB5; DNA-directed RNA polymerases I, II, and III subunit RPABC1
	ko:K03015	RPB7; DNA-directed RNA polymerase II subunit RPB7
	ko:K03018	RPC1; DNA-directed RNA polymerase III subunit RPC1 [EC:2.7.7.6]
	ko:K03020	RPC19; DNA-directed RNA polymerases I and III subunit RPAC2
	ko:K03022	RPC8; DNA-directed RNA polymerase III subunit RPC8
	ko:K03040	rpoA; DNA-directed RNA polymerase subunit alpha [EC:2.7.7.6]
	ko:K03050	rpoE2; DNA-directed RNA polymerase subunit E" [EC:2.7.7.6]
	ko:K03060	rpoZ; DNA-directed RNA polymerase subunit omega [EC:2.7.7.6]
ko00240 Pyrimidine metabolism	10
	ko:K03008	RPB11; DNA-directed RNA polymerase II subunit RPB11
	ko:K03010	RPB2; DNA-directed RNA polymerase II subunit RPB2 [EC:2.7.7.6]
	ko:K03013	RPB5; DNA-directed RNA polymerases I, II, and III subunit RPABC1
	ko:K03015	RPB7; DNA-directed RNA polymerase II subunit RPB7
	ko:K03018	RPC1; DNA-directed RNA polymerase III subunit RPC1 [EC:2.7.7.6]
	ko:K03020	RPC19; DNA-directed RNA polymerases I and III subunit RPAC2
	ko:K03022	RPC8; DNA-directed RNA polymerase III subunit RPC8
	ko:K03040	rpoA; DNA-directed RNA polymerase subunit alpha [EC:2.7.7.6]
	ko:K03050	rpoE2; DNA-directed RNA polymerase subunit E" [EC:2.7.7.6]
	ko:K03060	rpoZ; DNA-directed RNA polymerase subunit omega [EC:2.7.7.6]
ko04080 Neuroactive ligand-receptor interaction	10
	ko:K04010	C5AR1; C5a anaphylatoxin chemotactic receptor
	ko:K04130	CHRM2; muscarinic acetylcholine receptor M2
	ko:K04140	ADRA2C; adrenergic receptor alpha-2C
	ko:K04141	ADRB1; adrenergic receptor beta-1
	ko:K04142	ADRB2; adrenergic receptor beta-2
	ko:K04144	DRD1; dopamine receptor D1
	ko:K04145	DRD2; dopamine receptor D2
	ko:K04146	DRD3; dopamine receptor D3
	ko:K04150	HRH2; histamine receptor H2
	ko:K04320	MCHR1; melanin-concentrating hormone receptor 1
ko05169 Epstein-Barr virus infection	9
	ko:K03008	RPB11; DNA-directed RNA polymerase II subunit RPB11
	ko:K03010	RPB2; DNA-directed RNA polymerase II subunit RPB2 [EC:2.7.7.6]
	ko:K03013	RPB5; DNA-directed RNA polymerases I, II, and III subunit RPABC1
	ko:K03015	RPB7; DNA-directed RNA polymerase II subunit RPB7
	ko:K03018	RPC1; DNA-directed RNA polymerase III subunit RPC1 [EC:2.7.7.6]
	ko:K03020	RPC19; DNA-directed RNA polymerases I and III subunit RPAC2
	ko:K03022	RPC8; DNA-directed RNA polymerase III subunit RPC8
	ko:K03030	PSMD14; 26S proteasome regulatory subunit N11
	ko:K04012	CR2; complement receptor type 2
ko01130 Biosynthesis of antibiotics	9
	ko:K00010	iolG; myo-inositol 2-dehydrogenase / D-chiro-inositol 1-dehydrogenase [EC:1.1.1.18 1.1.1.369]
	ko:K00030	IDH3; isocitrate dehydrogenase (NAD+) [EC:1.1.1.41]
	ko:K00053	ilvC; ketol-acid reductoisomerase [EC:1.1.1.86]
	ko:K00240	sdhB; succinate dehydrogenase / fumarate reductase, iron-sulfur subunit [EC:1.3.5.1 1.3.5.4]
	ko:K00270	pdh; phenylalanine dehydrogenase [EC:1.4.1.20]
	ko:K00290	LYS1; saccharopine dehydrogenase (NAD+, L-lysine forming) [EC:1.5.1.7]
	ko:K00511	SQLE; squalene monooxygenase [EC:1.14.13.132]
	ko:K00600	glyA; glycine hydroxymethyltransferase [EC:2.1.2.1]
	ko:K00620	argJ; glutamate N-acetyltransferase / amino-acid N-acetyltransferase [EC:2.3.1.35 2.3.1.1]
ko01230 Biosynthesis of amino acids	8
	ko:K00030	IDH3; isocitrate dehydrogenase (NAD+) [EC:1.1.1.41]
	ko:K00052	leuB; 3-isopropylmalate dehydrogenase [EC:1.1.1.85]
	ko:K00053	ilvC; ketol-acid reductoisomerase [EC:1.1.1.86]
	ko:K00290	LYS1; saccharopine dehydrogenase (NAD+, L-lysine forming) [EC:1.5.1.7]
	ko:K00500	phhA; phenylalanine-4-hydroxylase [EC:1.14.16.1]
	ko:K00600	glyA; glycine hydroxymethyltransferase [EC:2.1.2.1]
	ko:K00620	argJ; glutamate N-acetyltransferase / amino-acid N-acetyltransferase [EC:2.3.1.35 2.3.1.1]
	ko:K00640	cysE; serine O-acetyltransferase [EC:2.3.1.30]
ko04024 cAMP signaling pathway	6
	ko:K04130	CHRM2; muscarinic acetylcholine receptor M2
	ko:K04141	ADRB1; adrenergic receptor beta-1
	ko:K04142	ADRB2; adrenergic receptor beta-2
	ko:K04144	DRD1; dopamine receptor D1
	ko:K04145	DRD2; dopamine receptor D2
	ko:K04630	GNAI; guanine nucleotide-binding protein G(i) subunit alpha
ko04020 Calcium signaling pathway	5
	ko:K04130	CHRM2; muscarinic acetylcholine receptor M2
	ko:K04141	ADRB1; adrenergic receptor beta-1
	ko:K04142	ADRB2; adrenergic receptor beta-2
	ko:K04144	DRD1; dopamine receptor D1
	ko:K04150	HRH2; histamine receptor H2
ko01200 Carbon metabolism	5
	ko:K00030	IDH3; isocitrate dehydrogenase (NAD+) [EC:1.1.1.41]
	ko:K00051	E1.1.1.82; malate dehydrogenase (NADP+) [EC:1.1.1.82]
	ko:K00240	sdhB; succinate dehydrogenase / fumarate reductase, iron-sulfur subunit [EC:1.3.5.1 1.3.5.4]
	ko:K00600	glyA; glycine hydroxymethyltransferase [EC:2.1.2.1]
	ko:K00640	cysE; serine O-acetyltransferase [EC:2.3.1.30]
ko05016 Huntington's disease	4
	ko:K03008	RPB11; DNA-directed RNA polymerase II subunit RPB11
	ko:K03010	RPB2; DNA-directed RNA polymerase II subunit RPB2 [EC:2.7.7.6]
	ko:K03013	RPB5; DNA-directed RNA polymerases I, II, and III subunit RPABC1
	ko:K03015	RPB7; DNA-directed RNA polymerase II subunit RPB7
ko04728 Dopaminergic synapse	4
	ko:K04144	DRD1; dopamine receptor D1
	ko:K04145	DRD2; dopamine receptor D2
	ko:K04146	DRD3; dopamine receptor D3
	ko:K04630	GNAI; guanine nucleotide-binding protein G(i) subunit alpha
ko04623 Cytosolic DNA-sensing pathway	4
	ko:K03013	RPB5; DNA-directed RNA polymerases I, II, and III subunit RPABC1
	ko:K03018	RPC1; DNA-directed RNA polymerase III subunit RPC1 [EC:2.7.7.6]
	ko:K03020	RPC19; DNA-directed RNA polymerases I and III subunit RPAC2
	ko:K03022	RPC8; DNA-directed RNA polymerase III subunit RPC8
ko04022 cGMP-PKG signaling pathway	4
	ko:K04140	ADRA2C; adrenergic receptor alpha-2C
	ko:K04141	ADRB1; adrenergic receptor beta-1
	ko:K04142	ADRB2; adrenergic receptor beta-2
	ko:K04630	GNAI; guanine nucleotide-binding protein G(i) subunit alpha
ko00190 Oxidative phosphorylation	4
	ko:K00240	sdhB; succinate dehydrogenase / fumarate reductase, iron-sulfur subunit [EC:1.3.5.1 1.3.5.4]
	ko:K00330	nuoA; NADH-quinone oxidoreductase subunit A [EC:1.6.5.3]
	ko:K00340	nuoK; NADH-quinone oxidoreductase subunit K [EC:1.6.5.3]
	ko:K00410	fbcH; ubiquinol-cytochrome c reductase cytochrome b/c1 subunit
ko04540 Gap junction	4
	ko:K04141	ADRB1; adrenergic receptor beta-1
	ko:K04144	DRD1; dopamine receptor D1
	ko:K04145	DRD2; dopamine receptor D2
	ko:K04630	GNAI; guanine nucleotide-binding protein G(i) subunit alpha
ko01210 2-Oxocarboxylic acid metabolism	4
	ko:K00030	IDH3; isocitrate dehydrogenase (NAD+) [EC:1.1.1.41]
	ko:K00052	leuB; 3-isopropylmalate dehydrogenase [EC:1.1.1.85]
	ko:K00053	ilvC; ketol-acid reductoisomerase [EC:1.1.1.86]
	ko:K00620	argJ; glutamate N-acetyltransferase / amino-acid N-acetyltransferase [EC:2.3.1.35 2.3.1.1]
ko04261 Adrenergic signaling in cardiomyocytes	3
	ko:K04141	ADRB1; adrenergic receptor beta-1
	ko:K04142	ADRB2; adrenergic receptor beta-2
	ko:K04630	GNAI; guanine nucleotide-binding protein G(i) subunit alpha
ko04924 Renin secretion	3
	ko:K04141	ADRB1; adrenergic receptor beta-1
	ko:K04142	ADRB2; adrenergic receptor beta-2
	ko:K04630	GNAI; guanine nucleotide-binding protein G(i) subunit alpha
ko05032 Morphine addiction	3
	ko:K00910	ADRBK; beta-adrenergic-receptor kinase [EC:2.7.11.15]
	ko:K04144	DRD1; dopamine receptor D1
	ko:K04630	GNAI; guanine nucleotide-binding protein G(i) subunit alpha
ko00520 Amino sugar and nucleotide sugar metabolism	3
	ko:K00770	E2.4.2.24; 1,4-beta-D-xylan synthase [EC:2.4.2.24]
	ko:K00790	murA; UDP-N-acetylglucosamine 1-carboxyvinyltransferase [EC:2.5.1.7]
	ko:K00983	E2.7.7.43; N-acylneuraminate cytidylyltransferase [EC:2.7.7.43]
ko05034 Alcoholism	3
	ko:K04144	DRD1; dopamine receptor D1
	ko:K04145	DRD2; dopamine receptor D2
	ko:K04630	GNAI; guanine nucleotide-binding protein G(i) subunit alpha
ko00650 Butanoate metabolism	3
	ko:K00100	E1.1.1.-
	ko:K00240	sdhB; succinate dehydrogenase / fumarate reductase, iron-sulfur subunit [EC:1.3.5.1 1.3.5.4]
	ko:K01040	gctB; glutaconate CoA-transferase, subunit B [EC:2.8.3.12]
ko04144 Endocytosis	3
	ko:K00910	ADRBK; beta-adrenergic-receptor kinase [EC:2.7.11.15]
	ko:K04141	ADRB1; adrenergic receptor beta-1
	ko:K04142	ADRB2; adrenergic receptor beta-2
ko00500 Starch and sucrose metabolism	3
	ko:K00770	E2.4.2.24; 1,4-beta-D-xylan synthase [EC:2.4.2.24]
	ko:K01210	E3.2.1.58; glucan 1,3-beta-glucosidase [EC:3.2.1.58]
	ko:K01212	sacC; levanase [EC:3.2.1.65]
ko04923 Regulation of lipolysis in adipocytes	3
	ko:K04141	ADRB1; adrenergic receptor beta-1
	ko:K04142	ADRB2; adrenergic receptor beta-2
	ko:K04630	GNAI; guanine nucleotide-binding protein G(i) subunit alpha
ko05012 Parkinson's disease	3
	ko:K04144	DRD1; dopamine receptor D1
	ko:K04145	DRD2; dopamine receptor D2
	ko:K04630	GNAI; guanine nucleotide-binding protein G(i) subunit alpha
ko05030 Cocaine addiction	3
	ko:K04144	DRD1; dopamine receptor D1
	ko:K04145	DRD2; dopamine receptor D2
	ko:K04630	GNAI; guanine nucleotide-binding protein G(i) subunit alpha
ko00920 Sulfur metabolism	3
	ko:K00380	cysJ; sulfite reductase (NADPH) flavoprotein alpha-component [EC:1.8.1.2]
	ko:K00640	cysE; serine O-acetyltransferase [EC:2.3.1.30]
	ko:K00860	cysC; adenylylsulfate kinase [EC:2.7.1.25]
ko04611 Platelet activation	2
	ko:K04350	RASGRP1; RAS guanyl-releasing protein 1
	ko:K04630	GNAI; guanine nucleotide-binding protein G(i) subunit alpha
ko04970 Salivary secretion	2
	ko:K04141	ADRB1; adrenergic receptor beta-1
	ko:K04142	ADRB2; adrenergic receptor beta-2
ko00670 One carbon pool by folate	2
	ko:K00600	glyA; glycine hydroxymethyltransferase [EC:2.1.2.1]
	ko:K00604	MTFMT; methionyl-tRNA formyltransferase [EC:2.1.2.9]
ko00140 Steroid hormone biosynthesis	2
	ko:K00071	HSD11B2; corticosteroid 11-beta-dehydrogenase isozyme 2 [EC:1.1.1.-]
	ko:K00512	CYP17A; steroid 17alpha-monooxygenase / 17alpha-hydroxyprogesterone aldolase [EC:1.14.99.9 4.1.2.30]
ko00290 Valine, leucine and isoleucine biosynthesis	2
	ko:K00052	leuB; 3-isopropylmalate dehydrogenase [EC:1.1.1.85]
	ko:K00053	ilvC; ketol-acid reductoisomerase [EC:1.1.1.86]
ko00562 Inositol phosphate metabolism	2
	ko:K00010	iolG; myo-inositol 2-dehydrogenase / D-chiro-inositol 1-dehydrogenase [EC:1.1.1.18 1.1.1.369]
	ko:K00920	PIP4K2; 1-phosphatidylinositol-5-phosphate 4-kinase [EC:2.7.1.149]
ko00591 Linoleic acid metabolism	2
	ko:K00100	E1.1.1.-
	ko:K00460	ALOX15; arachidonate 15-lipoxygenase [EC:1.13.11.33]
ko03050 Proteasome	2
	ko:K03030	PSMD14; 26S proteasome regulatory subunit N11
	ko:K03420	psmR; proteasome regulatory subunit
ko00400 Phenylalanine, tyrosine and tryptophan biosynthesis	2
	ko:K00270	pdh; phenylalanine dehydrogenase [EC:1.4.1.20]
	ko:K00500	phhA; phenylalanine-4-hydroxylase [EC:1.14.16.1]
ko00860 Porphyrin and chlorophyll metabolism	2
	ko:K00230	hemG; menaquinone-dependent protoporphyrinogen oxidase [EC:1.3.5.3]
	ko:K00510	HMOX; heme oxygenase [EC:1.14.99.3]
ko00260 Glycine, serine and threonine metabolism	2
	ko:K00130	betB; betaine-aldehyde dehydrogenase [EC:1.2.1.8]
	ko:K00600	glyA; glycine hydroxymethyltransferase [EC:2.1.2.1]
ko05200 Pathways in cancer	2
	ko:K04350	RASGRP1; RAS guanyl-releasing protein 1
	ko:K04630	GNAI; guanine nucleotide-binding protein G(i) subunit alpha
ko00910 Nitrogen metabolism	2
	ko:K00260	gudB; glutamate dehydrogenase [EC:1.4.1.2]
	ko:K00531	anfG; nitrogenase delta subunit [EC:1.18.6.1]
ko00350 Tyrosine metabolism	2
	ko:K00270	pdh; phenylalanine dehydrogenase [EC:1.4.1.20]
	ko:K00450	E1.13.11.4; gentisate 1,2-dioxygenase [EC:1.13.11.4]
ko00904 Diterpenoid biosynthesis	2
	ko:K04120	E5.5.1.13; ent-copalyl diphosphate synthase [EC:5.5.1.13]
	ko:K04122	GA3; ent-kaurene oxidase [EC:1.14.13.78]
ko04726 Serotonergic synapse	2
	ko:K00460	ALOX15; arachidonate 15-lipoxygenase [EC:1.13.11.33]
	ko:K04630	GNAI; guanine nucleotide-binding protein G(i) subunit alpha
ko04610 Complement and coagulation cascades	2
	ko:K04010	C5AR1; C5a anaphylatoxin chemotactic receptor
	ko:K04012	CR2; complement receptor type 2
ko00220 Arginine biosynthesis	2
	ko:K00260	gudB; glutamate dehydrogenase [EC:1.4.1.2]
	ko:K00620	argJ; glutamate N-acetyltransferase / amino-acid N-acetyltransferase [EC:2.3.1.35 2.3.1.1]
ko00625 Chloroalkane and chloroalkene degradation	2
	ko:K00100	E1.1.1.-
	ko:K00531	anfG; nitrogenase delta subunit [EC:1.18.6.1]
ko04724 Glutamatergic synapse	2
	ko:K00910	ADRBK; beta-adrenergic-receptor kinase [EC:2.7.11.15]
	ko:K04630	GNAI; guanine nucleotide-binding protein G(i) subunit alpha
ko04810 Regulation of actin cytoskeleton	2
	ko:K00920	PIP4K2; 1-phosphatidylinositol-5-phosphate 4-kinase [EC:2.7.1.149]
	ko:K04130	CHRM2; muscarinic acetylcholine receptor M2
ko00360 Phenylalanine metabolism	2
	ko:K00270	pdh; phenylalanine dehydrogenase [EC:1.4.1.20]
	ko:K00500	phhA; phenylalanine-4-hydroxylase [EC:1.14.16.1]
ko04062 Chemokine signaling pathway	2
	ko:K00910	ADRBK; beta-adrenergic-receptor kinase [EC:2.7.11.15]
	ko:K04630	GNAI; guanine nucleotide-binding protein G(i) subunit alpha
ko00020 Citrate cycle (TCA cycle)	2
	ko:K00030	IDH3; isocitrate dehydrogenase (NAD+) [EC:1.1.1.41]
	ko:K00240	sdhB; succinate dehydrogenase / fumarate reductase, iron-sulfur subunit [EC:1.3.5.1 1.3.5.4]
ko04015 Rap1 signaling pathway	2
	ko:K04145	DRD2; dopamine receptor D2
	ko:K04630	GNAI; guanine nucleotide-binding protein G(i) subunit alpha
ko00051 Fructose and mannose metabolism	2
	ko:K00100	E1.1.1.-
	ko:K00900	E2.7.1.105; 6-phosphofructo-2-kinase [EC:2.7.1.105]
ko00620 Pyruvate metabolism	2
	ko:K00051	E1.1.1.82; malate dehydrogenase (NADP+) [EC:1.1.1.82]
	ko:K04020	eutD; phosphotransacetylase
ko04971 Gastric acid secretion	2
	ko:K04150	HRH2; histamine receptor H2
	ko:K04630	GNAI; guanine nucleotide-binding protein G(i) subunit alpha
ko04725 Cholinergic synapse	2
	ko:K04130	CHRM2; muscarinic acetylcholine receptor M2
	ko:K04630	GNAI; guanine nucleotide-binding protein G(i) subunit alpha
ko00564 Glycerophospholipid metabolism	2
	ko:K00630	ATS1; glycerol-3-phosphate O-acyltransferase [EC:2.3.1.15]
	ko:K00650	LCAT; lecithin-cholesterol acyltransferase [EC:2.3.1.43]
ko00790 Folate biosynthesis	1
	ko:K00310	SE; pyrimidodiazepine synthase [EC:1.5.4.1]
ko00380 Tryptophan metabolism	1
	ko:K00562	INMT; methyltransferase [EC:2.1.1.49 2.1.1.96]
ko04745 Phototransduction - fly	1
	ko:K00910	ADRBK; beta-adrenergic-receptor kinase [EC:2.7.11.15]
ko00710 Carbon fixation in photosynthetic organisms	1
	ko:K00051	E1.1.1.82; malate dehydrogenase (NADP+) [EC:1.1.1.82]
ko00521 Streptomycin biosynthesis	1
	ko:K00010	iolG; myo-inositol 2-dehydrogenase / D-chiro-inositol 1-dehydrogenase [EC:1.1.1.18 1.1.1.369]
ko00100 Steroid biosynthesis	1
	ko:K00511	SQLE; squalene monooxygenase [EC:1.14.13.132]
ko04915 Estrogen signaling pathway	1
	ko:K04630	GNAI; guanine nucleotide-binding protein G(i) subunit alpha
ko04670 Leukocyte transendothelial migration	1
	ko:K04630	GNAI; guanine nucleotide-binding protein G(i) subunit alpha
ko04960 Aldosterone-regulated sodium reabsorption	1
	ko:K00071	HSD11B2; corticosteroid 11-beta-dehydrogenase isozyme 2 [EC:1.1.1.-]
ko02020 Two-component system	1
	ko:K00410	fbcH; ubiquinol-cytochrome c reductase cytochrome b/c1 subunit
ko04530 Tight junction	1
	ko:K04630	GNAI; guanine nucleotide-binding protein G(i) subunit alpha
ko00720 Carbon fixation pathways in prokaryotes	1
	ko:K00240	sdhB; succinate dehydrogenase / fumarate reductase, iron-sulfur subunit [EC:1.3.5.1 1.3.5.4]
ko00550 Peptidoglycan biosynthesis	1
	ko:K00790	murA; UDP-N-acetylglucosamine 1-carboxyvinyltransferase [EC:2.5.1.7]
ko00909 Sesquiterpenoid and triterpenoid biosynthesis	1
	ko:K00511	SQLE; squalene monooxygenase [EC:1.14.13.132]
ko05133 Pertussis	1
	ko:K04630	GNAI; guanine nucleotide-binding protein G(i) subunit alpha
ko00983 Drug metabolism - other enzymes	1
	ko:K00760	hprT; hypoxanthine phosphoribosyltransferase [EC:2.4.2.8]
ko00830 Retinol metabolism	1
	ko:K00061	RDH5; 11-cis-retinol dehydrogenase [EC:1.1.1.315]
ko00624 Polycyclic aromatic hydrocarbon degradation	1
	ko:K00480	E1.14.13.1; salicylate hydroxylase [EC:1.14.13.1]
ko00510 N-Glycan biosynthesis	1
	ko:K01230	MAN1; mannosyl-oligosaccharide alpha-1,2-mannosidase [EC:3.2.1.113]
ko01220 Degradation of aromatic compounds	1
	ko:K00480	E1.14.13.1; salicylate hydroxylase [EC:1.14.13.1]
ko04723 Retrograde endocannabinoid signaling	1
	ko:K04630	GNAI; guanine nucleotide-binding protein G(i) subunit alpha
ko04141 Protein processing in endoplasmic reticulum	1
	ko:K01230	MAN1; mannosyl-oligosaccharide alpha-1,2-mannosidase [EC:3.2.1.113]
ko00660 C5-Branched dibasic acid metabolism	1
	ko:K00052	leuB; 3-isopropylmalate dehydrogenase [EC:1.1.1.85]
ko03015 mRNA surveillance pathway	1
	ko:K00565	RNMT; mRNA (guanine-N7-)-methyltransferase [EC:2.1.1.56]
ko04916 Melanogenesis	1
	ko:K04630	GNAI; guanine nucleotide-binding protein G(i) subunit alpha
ko00940 Phenylpropanoid biosynthesis	1
	ko:K00430	E1.11.1.7; peroxidase [EC:1.11.1.7]
ko00621 Dioxin degradation	1
	ko:K00480	E1.14.13.1; salicylate hydroxylase [EC:1.14.13.1]
ko04917 Prolactin signaling pathway	1
	ko:K00512	CYP17A; steroid 17alpha-monooxygenase / 17alpha-hydroxyprogesterone aldolase [EC:1.14.99.9 4.1.2.30]
ko04360 Axon guidance	1
	ko:K04630	GNAI; guanine nucleotide-binding protein G(i) subunit alpha
ko00480 Glutathione metabolism	1
	ko:K00310	SE; pyrimidodiazepine synthase [EC:1.5.4.1]
ko04014 Ras signaling pathway	1
	ko:K04350	RASGRP1; RAS guanyl-releasing protein 1
ko00460 Cyanoamino acid metabolism	1
	ko:K00600	glyA; glycine hydroxymethyltransferase [EC:2.1.2.1]
ko04640 Hematopoietic cell lineage	1
	ko:K04012	CR2; complement receptor type 2
ko00450 Selenocompound metabolism	1
	ko:K00562	INMT; methyltransferase [EC:2.1.1.49 2.1.1.96]
ko00270 Cysteine and methionine metabolism	1
	ko:K00640	cysE; serine O-acetyltransferase [EC:2.3.1.30]
ko05414 Dilated cardiomyopathy	1
	ko:K04141	ADRB1; adrenergic receptor beta-1
ko04978 Mineral absorption	1
	ko:K00510	HMOX; heme oxygenase [EC:1.14.99.3]
ko05150 Staphylococcus aureus infection	1
	ko:K04010	C5AR1; C5a anaphylatoxin chemotactic receptor
ko00040 Pentose and glucuronate interconversions	1
	ko:K00040	uxuB; fructuronate reductase [EC:1.1.1.57]
ko04921 Oxytocin signaling pathway	1
	ko:K04630	GNAI; guanine nucleotide-binding protein G(i) subunit alpha
ko04727 GABAergic synapse	1
	ko:K04630	GNAI; guanine nucleotide-binding protein G(i) subunit alpha
ko04660 T cell receptor signaling pathway	1
	ko:K04350	RASGRP1; RAS guanyl-releasing protein 1
ko00363 Bisphenol degradation	1
	ko:K00100	E1.1.1.-
ko00280 Valine, leucine and isoleucine degradation	1
	ko:K00020	mmsB; 3-hydroxyisobutyrate dehydrogenase [EC:1.1.1.31]
ko00561 Glycerolipid metabolism	1
	ko:K00630	ATS1; glycerol-3-phosphate O-acyltransferase [EC:2.3.1.15]
ko04913 Ovarian steroidogenesis	1
	ko:K00512	CYP17A; steroid 17alpha-monooxygenase / 17alpha-hydroxyprogesterone aldolase [EC:1.14.99.9 4.1.2.30]
ko04740 Olfactory transduction	1
	ko:K00910	ADRBK; beta-adrenergic-receptor kinase [EC:2.7.11.15]
ko04010 MAPK signaling pathway	1
	ko:K04350	RASGRP1; RAS guanyl-releasing protein 1
ko00310 Lysine degradation	1
	ko:K00290	LYS1; saccharopine dehydrogenase (NAD+, L-lysine forming) [EC:1.5.1.7]
ko00590 Arachidonic acid metabolism	1
	ko:K00460	ALOX15; arachidonate 15-lipoxygenase [EC:1.13.11.33]
ko04070 Phosphatidylinositol signaling system	1
	ko:K00920	PIP4K2; 1-phosphatidylinositol-5-phosphate 4-kinase [EC:2.7.1.149]
ko00430 Taurine and hypotaurine metabolism	1
	ko:K00260	gudB; glutamate dehydrogenase [EC:1.4.1.2]
ko05142 Chagas disease (American trypanosomiasis)	1
	ko:K04630	GNAI; guanine nucleotide-binding protein G(i) subunit alpha
ko00680 Methane metabolism	1
	ko:K00600	glyA; glycine hydroxymethyltransferase [EC:2.1.2.1]
ko04914 Progesterone-mediated oocyte maturation	1
	ko:K04630	GNAI; guanine nucleotide-binding protein G(i) subunit alpha
ko02010 ABC transporters	1
	ko:K02010	afuC; iron(III) transport system ATP-binding protein [EC:3.6.3.30]
ko00300 Lysine biosynthesis	1
	ko:K00290	LYS1; saccharopine dehydrogenase (NAD+, L-lysine forming) [EC:1.5.1.7]
ko04713 Circadian entrainment	1
	ko:K04630	GNAI; guanine nucleotide-binding protein G(i) subunit alpha
ko00643 Styrene degradation	1
	ko:K01040	gctB; glutaconate CoA-transferase, subunit B [EC:2.8.3.12]
ko00970 Aminoacyl-tRNA biosynthesis	1
	ko:K00604	MTFMT; methionyl-tRNA formyltransferase [EC:2.1.2.9]
ko00770 Pantothenate and CoA biosynthesis	1
	ko:K00053	ilvC; ketol-acid reductoisomerase [EC:1.1.1.86]
ko04730 Long-term depression	1
	ko:K04630	GNAI; guanine nucleotide-binding protein G(i) subunit alpha
ko04976 Bile secretion	1
	ko:K03460	SLCO1A; solute carrier organic anion transporter family, member 1A
ko05145 Toxoplasmosis	1
	ko:K04630	GNAI; guanine nucleotide-binding protein G(i) subunit alpha
ko03018 RNA degradation	1
	ko:K00970	pcnB; poly(A) polymerase [EC:2.7.7.19]
ko04071 Sphingolipid signaling pathway	1
	ko:K04630	GNAI; guanine nucleotide-binding protein G(i) subunit alpha
ko00626 Naphthalene degradation	1
	ko:K00480	E1.14.13.1; salicylate hydroxylase [EC:1.14.13.1]
ko04151 PI3K-Akt signaling pathway	1
	ko:K04130	CHRM2; muscarinic acetylcholine receptor M2
ko00630 Glyoxylate and dicarboxylate metabolism	1
	ko:K00600	glyA; glycine hydroxymethyltransferase [EC:2.1.2.1]
ko00250 Alanine, aspartate and glutamate metabolism	1
	ko:K00260	gudB; glutamate dehydrogenase [EC:1.4.1.2]
ko00440 Phosphonate and phosphinate metabolism	1
	ko:K03430	phnW; 2-aminoethylphosphonate-pyruvate transaminase [EC:2.6.1.37]
ko04662 B cell receptor signaling pathway	1
	ko:K04012	CR2; complement receptor type 2
ko05031 Amphetamine addiction	1
	ko:K04144	DRD1; dopamine receptor D1
ko00513 Various types of N-glycan biosynthesis	1
	ko:K01230	MAN1; mannosyl-oligosaccharide alpha-1,2-mannosidase [EC:3.2.1.113]
ko02030 Bacterial chemotaxis	1
	ko:K03410	cheC; chemotaxis protein CheC
ko04310 Wnt signaling pathway	1
	ko:K04512	DAAM; dishevelled associated activator of morphogenesis
